# Supplementary material for: Integrated analysis of long noncoding RNAs and mRNA expression profiles reveals the potential role of lncRNAs in early stage of post-peripheral nerve injury in Sprague-Dawley rats
Source: Aging (Albany NY). 2021 May 8;13(10):13909–25. doi: 10.18632/aging.202989 (PMC8202893; doi:10.18632/aging.202989)
Supplement: Supplementary Table 1 [file aging-13-202989-s001.xlsx]

## Sheet: lncRNA_cis_prediction
Supplementary Table 1. Cis-target gene prediction.
chr	start	end	strands	lncRNA_id	chr	start	end	strands	gene_id	gene_name
1	212319063	212320022	-	NONRATT003317.2	1	212311299	212317244	-	ENSRNOG00000036648	LOC680693
17	70289570	70298696	+	NONRATT012585.2	17	70299182	70325855	-	ENSRNOG00000018091	Gdi2
19	26000504	26001720	-	NONRATT014576.2	19	25983168	26001317	+	ENSRNOG00000003279	Syce2
19	25886497	25886935	-	NONRATT014570.2	19	25821948	25914696	-	ENSRNOG00000002983	Nfix
11	79225185	79229373	+	NONRATT007115.2	11	79205729	79703736	-	ENSRNOG00000031669	Lpp
1	214323946	214324847	+	NONRATT001352.2	1	214328070	214353461	+	ENSRNOG00000018336	Eps8l2
5	139478773	139479967	-	NONRATT023558.2	5	139475933	139505065	-	ENSRNOG00000009963	Ctps1
3	13896140	13896938	-	NONRATT019222.2	3	13871516	13896838	-	ENSRNOG00000018687	Fbxw2
8	85840962	85841768	-	NONRATT028803.2	8	85838868	85840818	-	ENSRNOG00000009439	Eef1a1
X	15038472	15038880	+	NONRATT030437.2	X	15035568	15048440	+	ENSRNOG00000004819	Porcn
11	58798298	58800630	-	NONRATT006981.2	11	58803197	59110562	-	ENSRNOG00000031852	Lsamp
14	44803896	44804652	-	NONRATT009906.2	14	44803107	44804001	-	ENSRNOG00000051349	Rn60_14_0447.1
X	45410545	45411825	-	NONRATT030983.2	X	45410545	45419817	-	ENSRNOG00000060486	Ptges3l1
18	54496748	54497474	+	NONRATT013469.2	18	54243948	54496585	+	ENSRNOG00000050152
8	119439966	119481015	+	NONRATT028098.2	8	119486690	119523964	-	ENSRNOG00000033809	Mlh1
4	84670861	84671281	+	NONRATT020483.2	4	84678974	84740909	-	ENSRNOG00000009636	Scrn1
20	11060578	11124470	+	NONRATT017258.2	20	11114163	11144806	+	ENSRNOG00000001205	Agpat3
16	59116708	59124405	+	NONRATT011538.2	16	59077812	59245848	+	ENSRNOG00000010780	Dlc1
7	12167048	12167759	+	NONRATT025565.2	7	12144161	12168410	+	ENSRNOG00000051499	Tcf3
X	21106364	21106786	+	NONRATT030934.2	X	21063544	21168701	+	ENSRNOG00000002708	Phf8
1	70174337	70210610	-	NONRATT002268.2	1	70210564	70210658	-	ENSRNOG00000054183	MIMT1_1
19	44137443	44139463	-	NONRATT014734.2	19	44137422	44158621	-	ENSRNOG00000021517	Tmem231
1	73609856	73612407	-	NONRATT000343.2	1	73610148	73619356	-	ENSRNOG00000046683	RGD1566307
1	219199570	219217644	+	NONRATT001398.2	1	219199157	219207182	+	ENSRNOG00000017872	Aldh3b2
10	91164785	91165257	+	NONRATT004946.2	10	91164811	91186054	-	ENSRNOG00000003033	Plcd3
18	44614600	44641889	+	NONRATT013423.2	18	44468783	44642050	+	ENSRNOG00000024671	Dmxl1
1	41594111	41594799	+	ENSRNOT00000092014	1	41590493	41592204	+	ENSRNOG00000019358	Esr1
5	13065143	13065457	-	NONRATT023017.2	5	13033917	13097341	-	ENSRNOG00000006833	Rb1cc1
11	82384280	82385297	+	NONRATT006707.2	11	82373869	82392083	+	ENSRNOG00000001783	Tra2b
18	1175933	1177078	+	NONRATT013203.2	18	1142781	1176974	+	ENSRNOG00000015332	Thoc1
7	91511754	91513493	-	NONRATT026924.2	7	91511755	91538673	-	ENSRNOG00000004420	Rad21
8	79083450	79119656	-	NONRATT027837.2	8	79054236	79075122	+	ENSRNOG00000057867	Mns1
13	93657475	93658022	-	NONRATT009008.2	13	93651483	93677377	-	ENSRNOG00000003653	Fh
5	144141760	144142249	+	NONRATT022621.2	5	144114011	144150647	+	ENSRNOG00000025679	Stk40
X	138091150	138093199	+	NONRATT030807.2	X	138098667	138118696	-	ENSRNOG00000024762	Frmd7
4	7264747	7265278	-	NONRATT021107.2	4	7258175	7260317	+	ENSRNOG00000013383	Tmub1
11	47055806	47068906	+	NONRATT006535.2	11	47049241	47049379	+	ENSRNOG00000058009	SNORA70
2	260110332	260113182	-	NONRATT016970.2	2	260110308	260115577	-	ENSRNOG00000009992	Rabggtb
10	74241023	74241835	-	NONRATT004728.2	10	74243811	74298599	-	ENSRNOG00000005447	LOC100364791
11	53052387	53140770	+	NONRATT006562.2	11	53081024	53228556	+	ENSRNOG00000001971	Bbx
14	81563434	81563781	-	NONRATT010037.2	14	81516406	81638934	-	ENSRNOG00000013832	Fam193a
11	47114453	47115024	+	NONRATT006542.2	11	47116885	47122095	-	ENSRNOG00000001611	Rpl24
7	126729824	126732997	+	NONRATT026199.2	7	126711466	126735007	+	ENSRNOG00000015916	Ttc38
8	111223883	111224675	+	NONRATT027985.2	8	111209907	111226226	+	ENSRNOG00000008487	Amotl2
7	68438329	68439806	-	NONRATT026814.2	7	68446192	68512397	-	ENSRNOG00000007839	Slc16a7
10	104343232	104343879	+	NONRATT006267.2	10	104344098	104358253	-	ENSRNOG00000004310	Caskin2
5	73922631	73923028	-	NONRATT023248.2	5	73918746	73986373	-	ENSRNOG00000026271	Tmem245
2	251006789	251008164	+	NONRATT015845.2	2	250995516	251032894	+	ENSRNOG00000014059	Odf2l
1	87984485	87987036	-	NONRATT002488.2	1	87975996	88066101	-	ENSRNOG00000020557	Ryr1
16	59236442	59236915	+	NONRATT011541.2	16	59077812	59245848	+	ENSRNOG00000010780	Dlc1
5	148391876	148392592	-	NONRATT023652.2	5	148382705	148392697	-	ENSRNOG00000013179	Tinagl1
18	6021424	6047242	-	NONRATT013665.2	18	6020266	6083033	-	ENSRNOG00000016800	Ss18
7	117797596	117798069	-	NONRATT027074.2	7	117786206	117788550	-	ENSRNOG00000045765	MGC94207
20	8169556	8170033	+	NONRATT017220.2	20	8165306	8169555	+	ENSRNOG00000000529	Pim1
6	137699549	137702045	+	NONRATT024706.2	6	137711154	137733026	-	ENSRNOG00000013927	Jag2
17	47710211	47713383	-	ENSRNOT00000085839	17	47721976	47817248	+	ENSRNOG00000059510	AABR07027870.1
1	80305184	80306005	+	NONRATT000437.2	1	80306282	80315533	-	ENSRNOG00000018101	Klc3
1	16673162	16674571	-	NONRATT001988.2	1	16659441	16687817	-	ENSRNOG00000055858	Myb
1	81965094	81965551	-	NONRATT002397.2	1	81967273	82003691	-	ENSRNOG00000055650	Pou2f2
X	31816480	31817833	-	NONRATT030953.2	X	31816435	31851715	-	ENSRNOG00000003587	Figf
5	57544361	57545319	-	NONRATT023151.2	5	57555077	57555156	-	ENSRNOG00000055005	SNORD121A
2	198010143	198017086	-	NONRATT016675.2	2	198006315	198009314	+	ENSRNOG00000023816	Aph1a
11	87969050	87971080	+	NONRATT006760.2	11	87975526	87977368	-	ENSRNOG00000001864	Tmem191c
1	267308123	267315545	-	NONRATT003903.2	1	267281763	267315729	-	ENSRNOG00000020376	Obfc1
17	49610782	49612237	+	NONRATT012493.2	17	49610547	49617065	+	ENSRNOG00000013438	LOC500028
20	11515209	11515735	-	NONRATT017663.2	20	11501924	11528332	-	ENSRNOG00000001219	Tspear
5	154646422	154650913	+	NONRATT022750.2	5	154650631	154655132	+	ENSRNOG00000049975	Zfp46
10	50366946	50367381	-	NONRATT005531.2	10	50366951	50402616	-	ENSRNOG00000003384	Hs3st3b1
12	49451734	49452182	+	NONRATT007638.2	12	49419581	49561038	+	ENSRNOG00000052424	2900026A02Rik
7	118151468	118155583	-	NONRATT027076.2	7	118157095	118396728	-	ENSRNOG00000004688	Rbfox2
4	88441071	88513238	+	NONRATT020509.2	4	88441066	88515138	+	ENSRNOG00000006646	Vopp1
1	196863444	196883480	-	NONRATT003143.2	1	196839320	196854180	+	ENSRNOG00000015180	Kdm8
2	25075411	25076422	-	NONRATT015981.2	2	25072876	25095106	-	ENSRNOG00000029304	Aggf1
1	81093270	81098347	+	NONRATT000455.2	1	80973849	81099322	+	ENSRNOG00000032625	Zfp235
3	119284938	119286220	-	NONRATT019660.2	3	119259466	119330345	-	ENSRNOG00000057806	Trpm7
3	110548236	110551420	-	NONRATT019595.2	3	110540716	110541170	+	ENSRNOG00000055241	AABR07053500.1
4	115060757	115064689	-	NONRATT021538.2	4	115046692	115056140	+	ENSRNOG00000021866	Bola3
3	56802713	56839435	+	NONRATT018232.2	3	56802713	56838918	+	ENSRNOG00000056087	Erich2
X	123527450	123528043	-	NONRATT031260.2	X	123528491	123600890	-	ENSRNOG00000043182	2021-09-06
16	20061928	20062759	-	NONRATT011852.2	16	20051987	20052243	-	ENSRNOG00000059288	AC122603.2
3	60057890	60061449	-	NONRATT019380.2	3	60051534	60105212	-	ENSRNOG00000018485	Gpr155
5	165389468	165390249	+	NONRATT022845.2	5	165374950	165398217	+	ENSRNOG00000010719	Exosc10
1	221836212	221836896	+	NONRATT001481.2	1	221801523	221908045	+	ENSRNOG00000021103	Nrxn2
2	187899547	187902544	+	NONRATT015425.2	2	187911529	187914905	-	ENSRNOG00000019908	Lamtor2
19	10004307	10012038	+	NONRATT014013.2	19	9972536	10012043	+	ENSRNOG00000011933	Csnk2a2
16	7741976	7758100	-	NONRATT011761.2	16	7758995	7791243	+	ENSRNOG00000019656	Btd
2	209161077	209186430	+	NONRATT015678.2	2	209118921	209160653	-	ENSRNOG00000017723	Cept1
1	198690065	198690339	+	NONRATT001219.2	1	198682229	198684398	+	ENSRNOG00000017837	Zfp553
13	74418216	74420001	-	NONRATT008853.2	13	74410009	74474681	+	ENSRNOG00000004712	Angptl1
9	82385664	82386506	-	NONRATT030180.2	9	82373962	82377010	-	ENSRNOG00000018697	Abcb6
4	84678969	84680975	-	NONRATT021436.2	4	84678974	84740909	-	ENSRNOG00000009636	Scrn1
3	113906209	113926627	+	NONRATT018528.2	3	113918650	113957195	+	ENSRNOG00000022141	Ctdspl2
18	25784273	25784844	+	NONRATT013303.2	18	25749097	25965916	+	ENSRNOG00000020478	Camk4
6	105303406	105313050	-	NONRATT025172.2	6	105302557	105316024	-	ENSRNOG00000006976	Med6
19	37905807	37906627	-	NONRATT014644.2	19	37905863	37907714	-	ENSRNOG00000019353	Ctrl
7	12571201	12572260	-	NONRATT026526.2	7	12561315	12569126	-	ENSRNOG00000012379	Wdr18
X	156650767	156651574	+	NONRATT000899.2	X	156655959	156705233	+	ENSRNOG00000056659	Mecp2
4	7283007	7286028	+	NONRATT020131.2	4	7288854	7292901	-	ENSRNOG00000008380	Asic3
16	86672538	86675075	+	NONRATT011683.2	16	86631063	86675049	+	ENSRNOG00000014648	Efnb2
9	119681841	119682231	-	NONRATT030391.2	9	119676627	119818310	-	ENSRNOG00000014319	Smchd1
18	71832376	71883374	-	NONRATT013930.2	18	71463485	71829881	-	ENSRNOG00000018342	Ctif
1	154132178	154132491	+	NONRATT000937.2	1	154131925	154132330	+	ENSRNOG00000022941	LOC680217
2	230301448	230302074	-	NONRATT016859.2	2	230286891	230356834	-	ENSRNOG00000023373	Sec24b
5	127847120	127851520	-	NONRATT023461.2	5	127847128	127878792	-	ENSRNOG00000010859	Zyg11b
18	68485173	68486498	-	NONRATT013908.2	18	68488941	68551558	-	ENSRNOG00000012176	Rab27b
1	267282514	267283573	-	NONRATT003900.2	1	267281763	267315729	-	ENSRNOG00000020376	Obfc1
2	63096203	63098439	-	NONRATT015094.2	2	63101738	63166509	-	ENSRNOG00000013535	Cdh6
17	30537462	30573325	+	NONRATT012408.2	17	30556925	30573310	+	ENSRNOG00000029549	Eci3
15	50901966	50903131	+	NONRATT010559.2	15	50891126	50903162	+	ENSRNOG00000015075	Stc1
6	91878809	91881399	-	NONRATT025075.2	6	91885297	92007917	-	ENSRNOG00000004826	Sos2
1	166864889	166865213	+	NONRATT001039.2	1	166739635	166866093	+	ENSRNOG00000019693	Clpb
1	80259518	80263616	+	NONRATT000431.2	1	80267724	80271001	-	ENSRNOG00000016825	Cd3eap
5	173288194	173289604	+	NONRATT022938.2	5	173288446	173292929	+	ENSRNOG00000019244	Mxra8
3	13824958	13838015	-	ENSRNOT00000080186	3	13838303	13842762	+	ENSRNOG00000018294	Hspa5
5	128877418	128889965	-	NONRATT023469.2	5	128865388	128899792	+	ENSRNOG00000037710	Calr4
2	260112354	260116493	-	NONRATT016974.2	2	260110308	260115577	-	ENSRNOG00000009992	Rabggtb
3	8909647	8910483	-	NONRATT019134.2	3	8909539	8924032	-	ENSRNOG00000017295	Sh3glb2
14	85302164	85302891	+	NONRATT009540.2	14	85311832	85313187	+	ENSRNOG00000008951	Rasl10a
1	220891068	220891616	+	NONRATT001440.2	1	220882183	220883062	-	ENSRNOG00000055506	1700020D05Rik
19	56736593	56737926	+	NONRATT014395.2	19	56681978	56731372	-	ENSRNOG00000017919	Nup133
14	106378947	106380129	-	NONRATT010182.2	14	106378941	106393670	-	ENSRNOG00000008103	Mdh1
6	94641267	94663315	+	NONRATT024379.2	6	94636221	94739026	+	ENSRNOG00000004345	Daam1
19	22621344	22632069	-	NONRATT014530.2	19	22600867	22632071	-	ENSRNOG00000059579	Gpt2
4	62300992	62303077	+	NONRATT020353.2	4	62299043	62376533	+	ENSRNOG00000010397	Agbl3
9	114523786	114542735	-	NONRATT030371.2	9	114491418	114619711	-	ENSRNOG00000025527	Mtcl1
8	77237933	77238952	+	NONRATT028736.2	8	77107535	77237483	+	ENSRNOG00000054257	Adam10
5	146742889	146743612	-	NONRATT023624.2	5	146383941	146739418	+	ENSRNOG00000007057	Csmd2
10	72282870	72283245	+	NONRATT004689.2	10	72272247	72281067	+	ENSRNOG00000002916	Car4
1	266348765	266352139	+	NONRATT001814.2	1	266358727	266415296	+	ENSRNOG00000020020	Wbp1l
10	109541162	109542500	-	NONRATT006355.2	10	109539547	109551362	-	ENSRNOG00000036699	RGD1306926
19	10832399	10844421	+	NONRATT014037.2	19	10770573	10826895	-	ENSRNOG00000060931	Rspry1
1	254714946	254715848	+	NONRATT003728.2	1	254697246	254720087	+	ENSRNOG00000018718	Rpp30
9	63638509	63639009	+	NONRATT029395.2	9	63459094	63637677	-	ENSRNOG00000010188	Satb2
2	148722448	148745897	+	NONRATT015310.2	2	148718279	148722263	-	ENSRNOG00000011763	Serp1
14	83561210	83562280	+	NONRATT009513.2	14	83560540	83572473	+	ENSRNOG00000018859	Pik3ip1
8	115068268	115068828	+	NONRATT028002.2	8	115069094	115076130	+	ENSRNOG00000010789	Dusp7
20	11120140	11120841	+	NONRATT017261.2	20	11114163	11144806	+	ENSRNOG00000001205	Agpat3
5	73994587	73995745	-	NONRATT023250.2	5	74000226	74029238	-	ENSRNOG00000043103	Frrs1l
17	1798080	1798689	-	NONRATT012713.2	17	1798387	1830001	-	ENSRNOG00000018886	Aaed1
10	56845456	56846416	-	NONRATT005615.2	10	56848368	56850085	-	ENSRNOG00000018881	Rnasek
1	87089569	87092103	-	NONRATT002473.2	1	87078019	87147308	-	ENSRNOG00000020433	Actn4
8	116522142	116532146	-	NONRATT028975.2	8	116535402	116635851	-	ENSRNOG00000018333	Rbm6
10	15216757	15217132	-	NONRATT005297.2	10	15205533	15211325	-	ENSRNOG00000019930	Rhot2
1	101308957	101311935	-	NONRATT002628.2	1	101293408	101323960	-	ENSRNOG00000020714	Trpm4
9	65239553	65240138	-	NONRATT030043.2	9	65177510	65265149	+	ENSRNOG00000033923	Aox2
20	6877770	6898974	+	NONRATT017180.2	20	6869796	6903852	+	ENSRNOG00000000524	RGD735065
1	78382522	78383101	+	NONRATT000380.2	1	78354933	78390907	+	ENSRNOG00000015229	Zc3h4
4	123875883	123876293	+	NONRATT021637.2	4	123865724	123962881	+	ENSRNOG00000010213	Fgd5
18	48157183	48161302	+	NONRATT013433.2	18	48132413	48173971	+	ENSRNOG00000017832	Snx2
6	132738484	132739473	-	NONRATT025341.2	6	132735882	132747828	-	ENSRNOG00000004351	Slc25a29
6	22128398	22135726	-	NONRATT024826.2	6	22126869	22138286	-	ENSRNOG00000005610	Yipf4
4	175701003	175702499	+	NONRATT021005.2	4	175431903	175700238	+	ENSRNOG00000025042	Pde3a
5	59085113	59088784	+	NONRATT022222.2	5	59084625	59085676	-	ENSRNOG00000043023	Msmp
5	73570406	73571333	+	NONRATT022287.2	5	73561449	73621070	-	ENSRNOG00000010593	Ctnnal1
10	68045088	68049395	-	NONRATT005776.2	10	67866939	68142864	-	ENSRNOG00000003276	Myo1d
19	55392650	55393307	+	NONRATT014363.2	19	55389461	55423150	-	ENSRNOG00000014461	Galns
20	2099381	2101337	-	NONRATT017495.2	20	2089060	2092436	+	ENSRNOG00000000779	Znrd1
7	3342634	3343758	-	NONRATT026408.2	7	3342629	3346238	-	ENSRNOG00000007784	Bloc1s1
16	53980181	53980601	-	NONRATT012000.2	16	53957857	53978865	+	ENSRNOG00000009846	Frg1
18	28377973	28379145	+	NONRATT013329.2	18	28361282	28390696	+	ENSRNOG00000019875	Matr3
8	115913207	115913947	-	NONRATT028958.2	8	115912476	115912607	+	ENSRNOG00000053403	SNORA17
15	38113401	38130925	-	NONRATT010948.2	15	38104422	38104570	-	ENSRNOG00000061336	U1
4	6556224	6556747	-	NONRATT021091.2	4	6559544	6799632	+	ENSRNOG00000009085	Prkag2
1	169529797	169530748	-	NONRATT003027.2	1	169447385	169534896	-	ENSRNOG00000017191	Trim5
4	153025111	153026330	-	NONRATT021801.2	4	152995864	153018394	+	ENSRNOG00000011153	Il17ra
1	170652293	170653877	-	NONRATT003043.2	1	170652293	170653920	-	ENSRNOG00000019497	Mrpl17
13	70744408	70745144	-	NONRATT008821.2	13	70656726	70783515	-	ENSRNOG00000002680	Lamc1
19	39386189	39389831	+	NONRATT014245.2	19	39357813	39391672	+	ENSRNOG00000011142	Cyb5b
5	138344651	138346080	-	NONRATT023546.2	5	138354323	138361687	+	ENSRNOG00000046174	Gm17728
2	187698809	187699299	+	NONRATT015418.2	2	187708268	187735361	+	ENSRNOG00000019590	Smg5
5	169290097	169292349	+	NONRATT022887.2	5	169288870	169293137	+	ENSRNOG00000021814	Tnfrsf25
4	149910910	149912215	+	NONRATT020839.2	4	149908374	149908980	+	ENSRNOG00000014552	Zfp239
10	56276172	56276759	-	NONRATT005579.2	10	56271256	56276764	-	ENSRNOG00000030628	Eif4a1
5	136718355	136719659	-	NONRATT023520.2	5	136718351	136721379	-	ENSRNOG00000019655	Atp6v0b
7	80777484	80786293	+	NONRATT025934.2	7	80792599	80796670	-	ENSRNOG00000007999	Abra
8	36318718	36320033	-	NONRATT028395.2	8	36321992	36374673	-	ENSRNOG00000009993	Dcps
19	32396607	32398446	-	NONRATT014601.2	19	32401660	32528965	-	ENSRNOG00000011697	Zfp827
13	90650755	90651257	-	NONRATT008984.2	13	90650326	90650631	+	ENSRNOG00000055143	Metazoa_SRP
8	93323802	93349109	-	NONRATT028833.2	8	93324475	93390305	-	ENSRNOG00000027728	Ibtk
15	58626309	58657583	+	NONRATT010607.2	15	58654912	58658153	+	ENSRNOG00000001030	Tsc22d1
7	142994118	142995026	-	NONRATT027338.2	7	142994118	143016040	-	ENSRNOG00000025994	Krt80
8	127719501	127719942	+	NONRATT028145.2	8	127702533	127726127	+	ENSRNOG00000046257	Ctdspl
7	95378551	95379971	-	NONRATT026935.2	7	95309927	95387680	+	ENSRNOG00000004412	Mtbp
8	12284624	12312439	+	NONRATT027418.2	8	12284527	12333316	+	ENSRNOG00000005923	Mtmr2
15	60832510	60838135	-	NONRATT011115.2	15	60803097	60959769	-	ENSRNOG00000010065	Dgkh
12	22124565	22125445	+	NONRATT007368.2	12	22125570	22126350	-	ENSRNOG00000051023	Sap25
13	84076467	84077102	-	NONRATT008913.2	13	84083805	84217332	-	ENSRNOG00000003581	Pou2f1
1	53122325	53124691	-	NONRATT002169.2	1	53122321	53152866	-	ENSRNOG00000055093	Fgfr1op
8	49715428	49717488	+	NONRATT027646.2	8	49710476	49716955	+	ENSRNOG00000016469	Fxyd2
9	65902246	65916780	-	NONRATT030065.2	9	65885245	65917132	-	ENSRNOG00000024085	Tmem237
18	6177473	6182393	+	NONRATT013229.2	18	6114700	6182535	+	ENSRNOG00000030363	Psma8
19	24706996	24731985	-	NONRATT014546.2	19	24705480	24732024	-	ENSRNOG00000021808	Tecr
6	107531505	107536350	+	NONRATT025221.2	6	107517667	107522952	+	ENSRNOG00000046864	Acot4
3	161267515	161270582	-	NONRATT019946.2	3	161259734	161272460	-	ENSRNOG00000015187	Acot8
14	40015257	40027780	+	NONRATT009342.2	14	39964587	40049354	+	ENSRNOG00000002360	Gabrg1
5	58998212	58998863	-	NONRATT023185.2	5	58995248	58997953	+	ENSRNOG00000017253	Ccdc107
8	116305491	116306354	+	NONRATT028023.2	8	116302512	116306870	+	ENSRNOG00000021602	Zmynd10
13	47416963	47419351	-	NONRATT008677.2	13	47415350	47440682	-	ENSRNOG00000004162	Pfkfb2
8	126346700	126382588	-	NONRATT029070.2	8	126305190	126390801	-	ENSRNOG00000053820	AABR07071661.1
4	168846452	168846881	+	NONRATT020982.2	4	168832909	168851652	+	ENSRNOG00000008412	Gprc5a
8	79676026	79676398	+	NONRATT028718.2	8	79660656	79692039	+	ENSRNOG00000053428	Ccpg1
14	2173853	2174319	+	NONRATT009169.2	14	2100105	2174318	+	ENSRNOG00000000048	Gak
12	11232963	11240390	-	NONRATT007745.2	12	11240760	11251004	+	ENSRNOG00000000990	Pdap1
1	221676369	221678294	+	NONRATT001469.2	1	221673589	221693518	+	ENSRNOG00000027456	Cdc42bpg
14	46643221	46645093	+	NONRATT031966.1	14	46649970	46650381	+	ENSRNOG00000055956	AABR07015078.1
20	7131128	7131614	-	NONRATT017618.2	20	7136006	7138980	+	ENSRNOG00000000488	Hmga1
4	124050081	124052176	-	NONRATT020734.2	4	124036654	124048417	-	ENSRNOG00000010912	Mrps25
1	146089382	146091974	-	NONRATT002850.2	1	146069770	146226462	-	ENSRNOG00000012442	Cemip
7	18516249	18519137	-	NONRATT026597.2	7	18510353	18515503	+	ENSRNOG00000039204	Pram1
4	89693319	89693675	-	NONRATT021460.2	4	89693279	89695928	-	ENSRNOG00000023657	Gprin3
10	58772692	58773146	-	NONRATT005656.2	10	58780596	58784374	-	ENSRNOG00000014618	Med31
11	64747298	64747738	-	NONRATT006604.2	11	64723185	64752544	-	ENSRNOG00000003075	Tmem39a
20	7902041	7902630	+	NONRATT017215.2	20	7895082	7906142	+	ENSRNOG00000000504	Fance
6	23434627	23443880	-	NONRATT024835.2	6	23448685	23448761	-	ENSRNOG00000060589	SNORD53_SNORD92
7	14137772	14138994	-	NONRATT026556.2	7	14138494	14189688	-	ENSRNOG00000004346	Notch3
3	176886533	176887931	+	NONRATT018988.2	3	176890805	176926722	-	ENSRNOG00000014592	Zbtb46
10	58869186	58869538	+	NONRATT004521.2	10	58875825	58878445	+	ENSRNOG00000014953	Fbxo39
12	43946190	43946532	+	NONRATT007579.2	12	43920563	43940798	-	ENSRNOG00000001123	RGD1562310
3	11424018	11429217	+	NONRATT018046.2	3	11414185	11417546	-	ENSRNOG00000013973	Lcn2
4	91016577	91016935	+	NONRATT020520.2	4	90990087	91038748	+	ENSRNOG00000024986	Mmrn1
17	9990537	9991049	-	NONRATT012788.2	17	9990077	10004321	-	ENSRNOG00000016763	Fgfr4
16	35927851	35928209	-	NONRATT011948.2	16	35934969	36062719	+	ENSRNOG00000012037	Galnt7
7	137673500	137674256	-	NONRATT027279.2	7	137680529	137795655	+	ENSRNOG00000004831	Arid2
1	146037675	146038449	+	NONRATT000881.2	1	146027821	146029840	-	ENSRNOG00000012349	Mesdc1
8	64540378	64541157	+	NONRATT027766.2	8	64531593	64539367	+	ENSRNOG00000025979	Gramd2
7	66842497	66843449	-	NONRATT026811.2	7	66845692	66909470	-	ENSRNOG00000004314	Ppm1h
20	14426208	14440826	-	NONRATT017694.2	20	14421140	14545772	-	ENSRNOG00000001304	Bcr
6	137974429	137976369	+	NONRATT024715.2	6	137967400	137980217	+	ENSRNOG00000005153	LOC690422
7	2897379	2897802	+	NONRATT025467.2	7	2906136	2909179	-	ENSRNOG00000054140	LOC102551071
7	109129913	109159979	-	NONRATT026989.2	7	109037787	109205369	-	ENSRNOG00000025140	Zfat
12	31362163	31362588	+	NONRATT007442.2	12	31335371	31360254	+	ENSRNOG00000000936	Stx2
13	88536810	88547691	+	NONRATT008441.2	13	88556087	88557347	+	ENSRNOG00000059957	AABR07021734.2
17	18671037	18671839	-	NONRATT012359.2	17	18671043	18682876	-	ENSRNOG00000046547	Rbm24
18	26569183	26569697	+	NONRATT013309.2	18	26569041	26569175	+	ENSRNOG00000058981	SNORA13
10	62650752	62654210	+	NONRATT004569.2	10	62643452	62648844	-	ENSRNOG00000015002	Abhd15
14	16370514	16372687	-	NONRATT009775.2	14	16341535	16364326	+	ENSRNOG00000002125	Ccni
16	46535180	46540015	-	ENSRNOT00000090945	16	46532718	46532823	+	ENSRNOG00000056684	U6
2	252331529	252333038	-	NONRATT016934.2	2	252314425	252359798	-	ENSRNOG00000015678	Spata1
3	80092232	80093090	-	NONRATT019456.2	3	80081646	80093658	+	ENSRNOG00000014429	Arfgap2
6	1516165	1516866	+	NONRATT023970.2	6	1516157	1517618	+	ENSRNOG00000040303	Cebpzos
3	4042567	4044927	+	NONRATT017917.2	3	4034920	4043936	+	ENSRNOG00000019388	Egfl7
2	263650888	263653318	+	NONRATT015900.2	2	263212050	263650441	+	ENSRNOG00000021410	Negr1
9	92511949	92512389	-	NONRATT030241.2	9	92503596	92524739	-	ENSRNOG00000017072	Slc16a14
3	81295953	81296320	-	NONRATT019471.2	3	81287241	81292573	+	ENSRNOG00000006539	Pex16
5	157342052	157344523	-	NONRATT023760.2	5	157346285	157368450	-	ENSRNOG00000017037	Otud3
3	93904784	93905373	+	NONRATT018406.2	3	93909155	93931871	+	ENSRNOG00000009401	Lmo2
4	124749186	124749866	+	NONRATT021630.2	4	124660261	124858250	-	ENSRNOG00000023257	Adamts9
8	13301126	13302651	-	NONRATT028266.2	8	13305151	13352489	+	ENSRNOG00000009506	Mre11a
1	190741048	190742444	+	NONRATT001156.2	1	190681093	190742444	+	ENSRNOG00000025110	Vwa3a
3	25148813	25149093	+	NONRATT018105.2	3	25148521	25148657	+	ENSRNOG00000058641	SNORA70
16	8321354	8321603	+	NONRATT011305.2	16	8302949	8323293	+	ENSRNOG00000019768	Ncoa4
2	230302441	230302815	-	NONRATT016860.2	2	230286891	230356834	-	ENSRNOG00000023373	Sec24b
3	67857061	67862469	+	NONRATT018306.2	3	67849965	67862475	+	ENSRNOG00000008868	Dusp19
1	226106710	226107267	+	NONRATT001540.2	1	226114412	226152524	-	ENSRNOG00000020440	Fads2
7	104669169	104670024	-	NONRATT026921.2	7	104670075	104801045	-	ENSRNOG00000058733	Asap1
10	46876095	46877467	+	NONRATT004360.2	10	46840112	46896054	+	ENSRNOG00000059219	Myo15b
17	87679463	87681268	+	NONRATT012673.2	17	87274943	87681317	+	ENSRNOG00000008666	Etl4
3	153263537	153287418	-	NONRATT018811.2	3	153263691	153321352	-	ENSRNOG00000006921	Rbl1
8	115167299	115167696	-	NONRATT028947.2	8	115155469	115165706	+	ENSRNOG00000012406	Pcbp4
8	21388974	21394775	-	NONRATT028297.2	8	21380503	21384131	-	ENSRNOG00000048394	Zfp560
2	93693062	93696353	+	NONRATT015153.2	2	93675202	93696232	+	ENSRNOG00000010482	Impa1
13	73708857	73720429	+	NONRATT008339.2	13	73708814	73720429	+	ENSRNOG00000048267	Tor1aip2
7	63094376	63094901	+	NONRATT025830.2	7	63094910	63165159	+	ENSRNOG00000004476	Wif1
4	99741273	99749928	-	NONRATT021484.2	4	99738791	99746560	-	ENSRNOG00000008546	Mrpl35
1	62312796	62314577	-	NONRATT002231.2	1	62314275	62316450	-	ENSRNOG00000061533	Zfp945
19	55391341	55393794	-	NONRATT014794.2	19	55389461	55423150	-	ENSRNOG00000014461	Galns
1	79956060	79956572	+	NONRATT000417.2	1	79931155	79959461	+	ENSRNOG00000014353	Sympk
4	99397991	99398771	+	NONRATT020546.2	4	99398493	99415192	+	ENSRNOG00000007272	Rnf103
14	36148100	36149872	+	NONRATT009317.2	14	36071375	36149525	+	ENSRNOG00000002272	Lnx1
7	130258842	130259260	+	NONRATT026228.2	7	130227476	130259609	+	ENSRNOG00000026425	Ppp6r2
12	48625474	48627242	-	NONRATT008082.2	12	48628277	48656096	+	ENSRNOG00000000702	Sart3
4	145267123	145271240	+	NONRATT020783.2	4	145264461	145280857	+	ENSRNOG00000008142	Brpf1
14	3506970	3507393	-	NONRATT009701.2	14	3506338	3682545	+	ENSRNOG00000002093	Tgfbr3
4	168666573	168667325	+	NONRATT020975.2	4	168639939	168656673	-	ENSRNOG00000007126	Gpr19
1	263250647	263250914	-	NONRATT003798.2	1	263246247	263269762	-	ENSRNOG00000016356	Got1
14	38081522	38085281	+	NONRATT009331.2	14	38030188	38085919	+	ENSRNOG00000025925	Txk
12	19680355	19681224	+	NONRATT007360.2	12	19680711	19681832	+	ENSRNOG00000051906	AABR07035561.2
4	2053747	2063823	+	NONRATT020097.2	4	2055614	2065818	+	ENSRNOG00000005691	Rnf32
14	33335610	33362193	+	NONRATT009300.2	14	33354806	33362551	+	ENSRNOG00000024689	Hopx
1	48188090	48188713	+	NONRATT002145.2	1	48176105	48264477	+	ENSRNOG00000014997	Igf2r
8	87257323	87297889	-	NONRATT028811.2	8	87268180	87282156	-	ENSRNOG00000011521	Filip1
1	166119375	166120978	-	ENSRNOT00000082638	1	166125473	166394059	+	ENSRNOG00000019319	Fchsd2
4	126604096	126615402	+	NONRATT020743.2	4	126617243	126644895	-	ENSRNOG00000012952	Lrig1
15	34611072	34612409	-	NONRATT010921.2	15	34622122	34625121	-	ENSRNOG00000049096	Mcpt8l2
10	94252069	94254046	+	NONRATT004982.2	10	94260196	94268222	+	ENSRNOG00000008405	Taco1
10	39718246	39719353	+	NONRATT004273.2	10	39726506	39751398	+	ENSRNOG00000026596	RGD1566120
10	65601611	65602053	+	NONRATT005751.2	10	65591621	65606202	+	ENSRNOG00000011366	Pigs
15	43674690	43675434	-	NONRATT010526.2	15	43673959	43733182	-	ENSRNOG00000011158	Ppp2r2a
X	111099421	111100100	-	NONRATT018180.2	X	111099929	111102464	-	ENSRNOG00000061101	Ripply1
10	76172806	76184014	-	NONRATT004706.2	10	76164045	76166251	-	ENSRNOG00000002373	Akap1
2	166424765	166427768	+	NONRATT015352.2	2	166402837	166428331	+	ENSRNOG00000009310	Nmd3
12	42493826	42494330	-	NONRATT008021.2	12	42480559	42492526	-	ENSRNOG00000008706	Tbx3
14	45978998	45982041	-	NONRATT009912.2	14	45982243	46040373	+	ENSRNOG00000002192	Rell1
4	152968620	152969931	+	NONRATT020861.2	4	152892387	152972201	+	ENSRNOG00000010591	Kdm5a
19	26179607	26180668	+	NONRATT014159.2	19	26151899	26171808	+	ENSRNOG00000003970	Tnpo2
9	16076434	16080851	+	NONRATT029178.2	9	16003057	16080152	+	ENSRNOG00000015813	Ubr2
5	58371747	58372061	+	NONRATT022204.2	5	58359497	58383070	+	ENSRNOG00000000129	RGD1559864
4	62258682	62265698	+	NONRATT020351.2	4	62221010	62290229	+	ENSRNOG00000010233	Cald1
15	108775783	108776080	+	NONRATT010705.2	15	108608203	108838235	+	ENSRNOG00000014075	Clybl
10	39839609	39850893	+	NONRATT004277.2	10	39850817	39870188	+	ENSRNOG00000009104	Fnip1
10	31902599	31915355	+	NONRATT004194.2	10	31880917	31915247	+	ENSRNOG00000038894	Timd4
2	198418649	198419319	+	NONRATT015585.2	2	198411954	198412350	-	ENSRNOG00000032224	Hist1h4b
8	47257991	47259983	-	NONRATT028454.2	8	47259403	47339343	-	ENSRNOG00000008924	Arhgef12
5	16413352	16415228	+	NONRATT022065.2	5	16413355	16446881	+	ENSRNOG00000008156	Tgs1
5	167995892	167997909	-	NONRATT023888.2	5	167988384	167999853	-	ENSRNOG00000018289	Park7
5	172374270	172378007	+	NONRATT022911.2	5	172367397	172384269	+	ENSRNOG00000014044	Pank4
6	95930888	95931299	-	NONRATT025107.2	6	95929059	95934296	-	ENSRNOG00000022777	Six1
3	159381346	159385319	+	NONRATT018854.2	3	159368272	159384775	+	ENSRNOG00000033573	Sgk2
4	34649025	34649539	-	NONRATT021238.2	4	34635508	34779776	-	ENSRNOG00000008628	Ica1
16	21281739	21282264	+	NONRATT011436.2	16	21275310	21282246	+	ENSRNOG00000020602	Ndufa13
4	67463662	67520349	-	NONRATT021364.2	4	67396191	67520356	-	ENSRNOG00000010957	Braf
6	1342754	1345664	-	NONRATT024751.2	6	1330313	1410339	-	ENSRNOG00000025926	Heatr5b
8	103687204	103691333	+	NONRATT027951.2	8	103673410	103770947	+	ENSRNOG00000010027	Atr
16	21037089	21038895	-	NONRATT011889.2	16	21029595	21037078	+	ENSRNOG00000033318	Rfxank
10	45833260	45835013	-	NONRATT005478.2	10	45833263	45851984	-	ENSRNOG00000003129	Zfp496
7	98061619	98062280	-	NONRATT026958.2	7	98063734	98098268	-	ENSRNOG00000006738	Fbxo32
16	54044339	54045046	+	NONRATT011527.2	16	54040846	54137660	-	ENSRNOG00000010155	Pcm1
7	58413654	58419520	+	NONRATT025805.2	7	58419196	58423581	+	ENSRNOG00000053060	Zfc3h1
7	120854030	120854589	-	NONRATT027124.2	7	120847304	120882392	-	ENSRNOG00000021795	Fam227a
7	116982150	116982584	+	NONRATT026036.2	7	116985922	116986060	+	ENSRNOG00000059884	RNaseP_nuc
1	214292417	214293269	-	NONRATT003348.2	1	214283789	214317466	-	ENSRNOG00000017960	Deaf1
4	15845025	15859132	-	NONRATT021152.2	4	15710416	16130848	-	ENSRNOG00000033531	Cacna2d1
7	18613033	18613291	+	NONRATT025636.2	7	18599761	18612118	-	ENSRNOG00000007648	Rab11b
1	240919107	240920212	+	NONRATT001610.2	1	240908482	240933198	+	ENSRNOG00000014215	Klf9
1	165420552	165423384	+	NONRATT001009.2	1	165382689	165479655	+	ENSRNOG00000017608	C2cd3
8	117347943	117348689	+	NONRATT028041.2	8	117347028	117351610	+	ENSRNOG00000031965	Impdh2
4	157752678	157755167	+	NONRATT020918.2	4	157735747	157743199	-	ENSRNOG00000027552	Tapbpl
3	103856169	103857088	-	NONRATT019565.2	3	103852138	103857158	-	ENSRNOG00000005719	Emc4
7	141908588	141909159	+	NONRATT026287.2	7	141889443	141924785	+	ENSRNOG00000061088	Atf1
12	23552993	23553403	-	NONRATT007859.2	12	23544286	23564569	+	ENSRNOG00000001427	Orai2
8	63444692	63453168	-	NONRATT028642.2	8	63379189	63445642	+	ENSRNOG00000009029	Nptn
17	77287579	77288044	-	NONRATT013116.2	17	77287187	77304530	-	ENSRNOG00000018044	Phyh
19	52694646	52695474	+	NONRATT014340.2	19	52647069	52705131	+	ENSRNOG00000016752	Crispld2
10	15160035	15160823	-	NONRATT005286.2	10	15159802	15161938	-	ENSRNOG00000019684	Fam173a
6	107295403	107365806	-	NONRATT024507.2	6	107279919	107325345	-	ENSRNOG00000009653	Numb
8	127962719	127963319	-	NONRATT029073.2	8	127920348	128009951	-	ENSRNOG00000013136	Oxsr1
7	29573250	29573870	-	NONRATT026653.2	7	29492065	29701586	-	ENSRNOG00000006841	Ano4
7	15332432	15856677	-	NONRATT026586.2	7	15360699	15364203	-	ENSRNOG00000026582	RGD1310212
17	15032975	15096881	+	NONRATT012327.2	17	15022950	15030364	-	ENSRNOG00000027311	Nutm2f
16	46927093	46929017	+	NONRATT011495.2	16	46731402	46926245	+	ENSRNOG00000012802	Tenm3
1	164570254	164571112	+	NONRATT000992.2	1	164502388	164593139	+	ENSRNOG00000030404	Arrb1
5	144119429	144120055	+	NONRATT022620.2	5	144114011	144150647	+	ENSRNOG00000025679	Stk40
13	96843000	96843403	-	NONRATT009035.2	13	96775356	97173469	-	ENSRNOG00000028624	Kif26b
6	104611020	104613993	+	NONRATT024447.2	6	104611025	104615302	+	ENSRNOG00000005513	Srsf5
17	24656330	24656708	+	NONRATT012389.2	17	24654901	24670457	+	ENSRNOG00000015522	Tfap2a
9	92704898	92748917	+	NONRATT029596.2	9	92753956	92775816	-	ENSRNOG00000017273	RGD1563917
7	2616788	2619195	+	NONRATT025450.2	7	2605718	2621852	+	ENSRNOG00000031612	Gls2
7	40314818	40315578	-	NONRATT026703.2	7	40306042	40316532	-	ENSRNOG00000006973	RGD1307947
7	97782784	97792907	+	NONRATT025970.2	7	97760133	97839663	+	ENSRNOG00000006103	Tbc1d31
6	59951050	59955917	+	NONRATT024253.2	6	59948576	59950586	-	ENSRNOG00000004282	Arl4a
2	211628605	211638740	-	NONRATT016792.2	2	211595658	211638788	-	ENSRNOG00000020392	Stxbp3
2	198360970	198362028	+	NONRATT015582.2	2	198360997	198361378	+	ENSRNOG00000045753	LOC100912338
3	21804526	21812731	+	NONRATT018093.2	3	21698031	21815379	+	ENSRNOG00000009402	Rabgap1
2	207324930	207350514	-	NONRATT016746.2	2	207305751	207350812	-	ENSRNOG00000013538	Capza1
20	5344606	5410527	+	NONRATT017132.2	20	5414447	5418015	+	ENSRNOG00000038999	RT1-A1
4	183656064	183665754	+	NONRATT021062.2	4	183656012	183665754	+	ENSRNOG00000036918	Mettl20
16	19983420	19983894	-	NONRATT011847.2	16	19992983	19996716	-	ENSRNOG00000042658	Nxnl1
1	83968056	83969017	+	NONRATT000503.2	1	83965607	83969559	+	ENSRNOG00000028891	Cyp2t1
7	12534004	12536789	+	NONRATT025585.2	7	12532874	12536797	+	ENSRNOG00000013545	Polr2e
1	219672405	219672758	-	NONRATT003432.2	1	219668351	219682287	-	ENSRNOG00000019220	Rhod
4	145682320	145682815	+	NONRATT020800.2	4	145686192	145699577	-	ENSRNOG00000010628	Sec13
1	224972219	224973039	-	NONRATT003547.2	1	224970806	224972168	+	ENSRNOG00000019266	Tmem223
7	78462313	78512283	+	NONRATT026893.2	7	78092036	78592521	+	ENSRNOG00000004201	Rims2
11	82373865	82385352	+	NONRATT006706.2	11	82373869	82392083	+	ENSRNOG00000001783	Tra2b
1	190840231	190842435	+	NONRATT001158.2	1	190780235	190842324	+	ENSRNOG00000016448	Eef2k
18	56516064	56518066	-	NONRATT013846.2	18	56520739	56534415	-	ENSRNOG00000018082	Slc26a2
2	52263453	52263950	-	NONRATT016126.2	2	52189528	52282548	-	ENSRNOG00000026842	Nnt
9	13475192	13476376	+	NONRATT029140.2	9	13446895	13490669	+	ENSRNOG00000053945	Daam2
6	50929138	50929910	-	NONRATT024955.2	6	50928396	50941248	-	ENSRNOG00000008155	Dus4l
13	93095820	93113195	-	NONRATT009003.2	13	93095199	93307199	-	ENSRNOG00000021984	Rgs7
5	62154527	62155958	-	NONRATT023223.2	5	62157148	62187930	-	ENSRNOG00000008901	Coro2a
11	31813128	31813576	+	NONRATT006444.2	11	31780486	31805728	-	ENSRNOG00000028292	Gart
5	90184029	90184690	-	NONRATT023329.2	5	90040494	90282327	-	ENSRNOG00000006503	Frmd3
4	157662539	157666340	+	NONRATT020912.2	4	157647081	157658390	+	ENSRNOG00000018453	Nop2
15	12407581	12407998	+	NONRATT010287.2	15	12407523	12416105	+	ENSRNOG00000006751	Psmd6
6	129835935	129879427	+	NONRATT024602.2	6	129835918	129902793	+	ENSRNOG00000005274	Vrk1
14	72889070	72889566	+	NONRATT009427.2	14	72889037	72949307	+	ENSRNOG00000057056	Rab5a
1	82565281	82566156	-	NONRATT002423.2	1	82550891	82580761	-	ENSRNOG00000020716	Axl
17	15997659	15998027	+	NONRATT012339.2	17	15966233	16032420	+	ENSRNOG00000016684	Wnk2
X	112117196	112118254	+	NONRATT019330.2	X	112020645	112121943	+	ENSRNOG00000060542	Mid2
2	43292095	43292601	+	NONRATT015009.2	2	43266738	43291943	+	ENSRNOG00000013121	Mier3
1	144238642	144352643	+	NONRATT000872.2	1	144239019	144561247	+	ENSRNOG00000010840	Adamtsl3
1	276242377	276272556	+	NONRATT001874.2	1	276240702	276290008	+	ENSRNOG00000016265	Acsl5
14	76981740	76990071	-	NONRATT009982.2	14	76989918	77023726	+	ENSRNOG00000028498	Wdr1
1	213613510	213614052	-	NONRATT003329.2	1	213606598	213612904	+	ENSRNOG00000013256	Ric8a
10	63776271	63778822	+	NONRATT005712.2	10	63778754	63795899	+	ENSRNOG00000056954	Inpp5k
4	77548648	77548923	+	NONRATT020428.2	4	77554268	77580714	+	ENSRNOG00000026981	Zfp282
7	125340437	125341384	-	NONRATT026787.2	7	125340474	125407806	-	ENSRNOG00000052725	RGD1566029
20	38966969	38970070	-	NONRATT017783.2	20	38967237	38985036	-	ENSRNOG00000029360	Serinc1
15	39735106	39744954	-	NONRATT010965.2	15	39712860	39742103	-	ENSRNOG00000021680	Setdb2
2	25985211	25992046	-	NONRATT015988.2	2	25738513	26011429	-	ENSRNOG00000016544	Arhgef28
10	46977539	46978792	-	NONRATT005495.2	10	46972037	46974806	+	ENSRNOG00000028208	Mief2
4	10993307	10994300	-	NONRATT021142.2	4	10992341	10995792	-	ENSRNOG00000052731	AABR07059243.1
10	75678951	75716190	-	NONRATT004711.2	10	75681392	76039964	-	ENSRNOG00000025338	Msi2
10	104459953	104460344	+	NONRATT006260.2	10	104451221	104457001	+	ENSRNOG00000049642	Smim5
3	105616311	105618149	-	NONRATT019572.2	3	105570291	105640463	-	ENSRNOG00000008912	Aqr
7	10999140	10999483	-	NONRATT026426.2	7	10988531	11001933	-	ENSRNOG00000005874	Tle2
4	157523549	157552364	+	NONRATT020898.2	4	157513413	157516746	+	ENSRNOG00000017052	Pianp
8	48732979	48733835	-	NONRATT028478.2	8	48723190	48727154	-	ENSRNOG00000011904	Trappc4
3	121624067	121626581	+	NONRATT019678.2	3	121596790	121624048	+	ENSRNOG00000018205	Ttl
1	81487443	81488649	+	NONRATT000474.2	1	81474552	81492631	+	ENSRNOG00000055259	Phldb3
13	89661761	89668391	-	NONRATT008967.2	13	89661762	89668473	-	ENSRNOG00000003706	Ufc1
6	29483441	29596208	+	NONRATT024895.2	6	29518415	29522567	+	ENSRNOG00000051471	AABR07063346.1
7	120867519	120867908	-	NONRATT027125.2	7	120865881	120882392	-	ENSRNOG00000021795	Fam227a
X	43269120	43269541	-	NONRATT030979.2	X	43276764	43276890	-	ENSRNOG00000051820	SNORA17
14	7169636	7171805	+	NONRATT009202.2	14	7171612	7214220	+	ENSRNOG00000002214	Klhl8
10	15485252	15486371	+	NONRATT004118.2	10	15485904	15495377	+	ENSRNOG00000020374	Tmem8a
5	122551370	122552222	-	NONRATT023424.2	5	122551404	122642202	-	ENSRNOG00000006999	Wdr78
7	15242446	15242990	+	NONRATT025616.2	7	15247680	15250411	+	ENSRNOG00000004572	Zfp472
1	178390100	178412836	+	NONRATT001121.2	1	178351679	178431395	+	ENSRNOG00000013176	Far1
3	160017191	160018039	-	NONRATT019920.2	3	159995063	160013274	+	ENSRNOG00000009076	Ttpal
20	22742001	22742773	+	NONRATT017354.2	20	22728207	22746474	+	ENSRNOG00000000641	LOC100363472
1	88879425	88881469	-	NONRATT002504.2	1	88885936	88892615	+	ENSRNOG00000025111	Nfkbid
15	24543762	24552829	+	NONRATT010342.2	15	24479760	24553197	+	ENSRNOG00000012255	Ktn1
6	78544542	78545816	-	NONRATT025041.2	6	78545803	78549669	-	ENSRNOG00000009284	Foxa1
3	134418078	134441893	+	NONRATT018658.2	3	134440194	134441540	+	ENSRNOG00000050784	AABR07054000.1
20	11246735	11247221	+	NONRATT017265.2	20	11228843	11243205	+	ENSRNOG00000001210	Pwp2
1	85508377	85510137	-	NONRATT002460.2	1	85496936	85504190	+	ENSRNOG00000051208	Selv
13	90823432	90823810	-	NONRATT008475.2	13	90807198	90814119	-	ENSRNOG00000008301	Tagln2
19	56046164	56047556	-	NONRATT014808.2	19	56040528	56054142	-	ENSRNOG00000028904	Vps9d1
10	14451460	14452297	+	NONRATT004101.2	10	14461838	14476785	-	ENSRNOG00000016774	Telo2
8	115387289	115387679	-	NONRATT028950.2	8	115360712	115388266	-	ENSRNOG00000013201	Tex264
4	120843498	120852126	+	NONRATT020706.2	4	120843452	120854529	+	ENSRNOG00000016665	Tpra1
10	35876766	35878868	+	NONRATT004223.2	10	35870231	35878775	+	ENSRNOG00000003399	Hnrnph1
8	76853139	76861155	-	NONRATT027850.2	8	76865687	76940094	-	ENSRNOG00000060750	Rnf111
20	11482117	11482879	+	NONRATT017270.2	20	11478089	11478186	+	ENSRNOG00000057911	snoZ6
4	117004975	117005652	-	NONRATT021558.2	4	116993913	117111653	-	ENSRNOG00000037871	Sfxn5
11	72182189	72201224	-	NONRATT007093.2	11	72164565	72378895	-	ENSRNOG00000038597	Dlg1
5	57532088	57533090	+	NONRATT022196.2	5	57472314	57530987	+	ENSRNOG00000010727	Ube2r2
7	126687409	126688030	-	NONRATT027209.2	7	126695497	126701872	-	ENSRNOG00000029591	Pkdrej
4	6670353	6673645	-	NONRATT021094.2	4	6559544	6799632	+	ENSRNOG00000009085	Prkag2
7	29020823	29021351	+	NONRATT025704.2	7	29029262	29044251	+	ENSRNOG00000005270	Sycp3
2	202527658	202529050	+	NONRATT015626.2	2	202470486	202526849	+	ENSRNOG00000019754	Gdap2
16	7745610	7758332	-	NONRATT011762.2	16	7758995	7791243	+	ENSRNOG00000019656	Btd
19	54616326	54616947	+	NONRATT014354.2	19	54553418	54613477	+	ENSRNOG00000018784	Jph3
13	25512115	25513827	-	NONRATT008631.2	13	25513891	25652473	-	ENSRNOG00000014866	Pign
7	14041672	14042274	+	NONRATT025609.2	7	14044585	14054639	-	ENSRNOG00000028512	Ilvbl
10	53742976	53744276	+	NONRATT004409.2	10	53740840	53764610	+	ENSRNOG00000049695	Myh1
8	61273343	61273794	-	NONRATT028602.2	8	61274016	61290240	-	ENSRNOG00000017193	Lingo1
4	171166997	171167461	-	NONRATT021932.2	4	171069190	171176581	-	ENSRNOG00000027592	Rerg
10	63659317	63659901	+	NONRATT005724.2	10	63635250	63658360	+	ENSRNOG00000003495	Prpf8
2	143674622	143687635	+	NONRATT015286.2	2	143656844	143688087	+	ENSRNOG00000012660	Postn
7	123242583	123259570	-	NONRATT027157.2	7	123238332	123259636	-	ENSRNOG00000005577	Desi1
15	4073543	4074151	+	NONRATT010239.2	15	4077950	4084314	+	ENSRNOG00000040122	Myoz1
1	197855360	197856162	-	NONRATT003159.2	1	197856902	197858016	-	ENSRNOG00000047124	Atp2a1
4	157052297	157063922	-	NONRATT021831.2	4	157043924	157078130	-	ENSRNOG00000011156	Clstn3
3	3823965	3826055	-	NONRATT019084.2	3	3827501	3834210	-	ENSRNOG00000018876	Sdccag3
19	10009816	10010836	+	NONRATT014014.2	19	9972536	10012043	+	ENSRNOG00000011933	Csnk2a2
19	52596460	52597048	+	NONRATT014338.2	19	52566606	52608817	+	ENSRNOG00000016509	Usp10
17	43050802	43051155	+	NONRATT012473.2	17	43050960	43339403	+	ENSRNOG00000016576	Lrrc16a
6	92670492	92671119	-	NONRATT025087.2	6	92660504	92760018	-	ENSRNOG00000007031	Trim9
8	13897893	13903127	-	NONRATT028278.2	8	13871212	13909188	-	ENSRNOG00000010999	Cep295
9	1570632	1571307	+	NONRATT029122.2	9	1145699	1746397	+	ENSRNOG00000010637	Tbc1d5
3	3397709	3398394	-	NONRATT019064.2	3	3389611	3390443	+	ENSRNOG00000032635	LOC100360117
10	75375635	75382014	+	NONRATT005830.2	10	75365821	75381555	+	ENSRNOG00000009819	Vezf1
2	181831919	181861982	-	NONRATT016500.2	2	181831243	181874223	-	ENSRNOG00000025823	Rbm46
4	117293934	117295943	-	NONRATT021567.2	4	117293619	117296082	-	ENSRNOG00000015719	Egr4
10	72158046	72158519	-	NONRATT005798.2	10	72147815	72148783	+	ENSRNOG00000053557
10	13578648	13579591	-	NONRATT005250.2	10	13586647	13591953	-	ENSRNOG00000007436	LOC100158225
1	142863231	142864227	+	NONRATT000859.2	1	142834156	142870995	+	ENSRNOG00000060206	Zfp592
1	236310922	236311318	+	NONRATT001592.2	1	236031987	236313858	+	ENSRNOG00000012036	Pcsk5
7	124412757	124413367	-	NONRATT027186.2	7	124412761	124423832	-	ENSRNOG00000010539	Mcat
9	86347056	86347495	-	NONRATT030218.2	9	86312500	86419044	-	ENSRNOG00000053200	Dock10
13	110033960	110036308	-	NONRATT009129.2	13	110007009	110031895	+	ENSRNOG00000003915	Tmem206
3	163845950	163846406	-	NONRATT019987.2	3	163850784	163935617	-	ENSRNOG00000046949	Kcnb1
4	140155574	140156405	+	NONRATT020760.2	4	140139002	140220487	-	ENSRNOG00000006813	Sumf1
4	48854031	48900183	-	NONRATT021257.2	4	48852826	48928372	-	ENSRNOG00000059016	Tspan12
6	135259636	135268350	+	ENSRNOT00000089556	6	135231605	135251073	-	ENSRNOG00000007850	Mok
18	16539749	16544003	-	NONRATT013701.2	18	16544507	16581116	+	ENSRNOG00000015301	Elp2
1	61455646	61456654	+	NONRATT000263.2	1	61445671	61509765	+	ENSRNOG00000058436	AABR07001899.1
13	84142155	84151613	-	NONRATT008917.2	13	84083805	84217332	-	ENSRNOG00000003581	Pou2f1
10	84684302	84686507	-	NONRATT005943.2	10	84682459	84698886	-	ENSRNOG00000008830	Nfe2l1
2	33917564	33917950	-	NONRATT016063.2	2	33881023	33920837	-	ENSRNOG00000047137	Erbb2ip
1	221744079	221746790	+	NONRATT001473.2	1	221735516	221749086	+	ENSRNOG00000021085	Sf1
7	139343183	139344382	-	NONRATT027312.2	7	139342062	139394166	-	ENSRNOG00000054420	Vdr
19	25693771	25694160	+	NONRATT014130.2	19	25526750	25749550	+	ENSRNOG00000052707	Cacna1a
3	127528409	127530493	-	NONRATT019722.2	3	127528433	127569093	-	ENSRNOG00000024852	Tmx4
13	51240542	51255799	+	NONRATT008233.2	13	51229889	51236463	+	ENSRNOG00000003973	Cyb5r1
7	132916910	132922578	+	NONRATT026238.2	7	132857627	133018584	+	ENSRNOG00000004048	Lrrk2
13	85430770	85437749	+	NONRATT008431.2	13	85376715	85443976	-	ENSRNOG00000003917	Uck2
6	42676664	42681798	+	NONRATT024162.2	6	42656615	42745098	+	ENSRNOG00000005344	Nol10
8	58972876	58976429	-	NONRATT028581.2	8	58932579	59077690	-	ENSRNOG00000009170	Dmxl2
6	102076811	102078091	-	NONRATT025145.2	6	102048371	102073041	+	ENSRNOG00000009432	Eif2s1
2	118857040	118857646	+	NONRATT015207.2	2	118831349	118861454	+	ENSRNOG00000056371	Pik3ca
5	16843263	16847809	+	NONRATT022066.2	5	16845630	16847776	+	ENSRNOG00000031769	Chchd7
1	256647649	256648359	+	NONRATT001708.2	1	256585409	256734719	-	ENSRNOG00000016117	Myof
X	74205991	74211588	+	NONRATT030611.2	X	74201156	74211588	+	ENSRNOG00000037919	Chic1
4	170910582	170911293	-	NONRATT021924.2	4	170913922	170932618	-	ENSRNOG00000005809	Arhgdib
14	86040153	86040696	+	NONRATT009551.2	14	86029334	86044364	+	ENSRNOG00000012378	Dbnl
8	53417274	53417869	+	NONRATT027669.2	8	53411315	53429420	+	ENSRNOG00000008058	Tmprss5
2	127723016	127754562	-	NONRATT016357.2	2	127707689	127754648	-	ENSRNOG00000012729	Mfsd8
3	148328058	148350921	+	NONRATT018754.2	3	148344940	148345090	-	ENSRNOG00000051455	snoU109
1	185568770	185569150	-	NONRATT003081.2	1	185558035	185569190	-	ENSRNOG00000053659	RGD1311703
6	93448778	93461300	-	NONRATT025091.2	6	93437382	93441873	+	ENSRNOG00000007851	Psma3
5	100919475	100921461	-	NONRATT023348.2	5	100924621	100977902	-	ENSRNOG00000010484	Zdhhc21
4	19222644	19223414	-	NONRATT021165.2	4	19224309	19413484	-	ENSRNOG00000007202	Sema3d
2	57274168	57274473	+	NONRATT015078.2	2	57276918	57348481	+	ENSRNOG00000042118	RGD1310081
12	6342928	6345060	+	NONRATT007244.2	12	6322667	6341902	-	ENSRNOG00000000902	Hsph1
4	155635523	155635969	-	NONRATT021823.2	4	155549985	155631856	-	ENSRNOG00000008376	Slc2a3
1	199689739	199691053	-	NONRATT003240.2	1	199682687	199688809	+	ENSRNOG00000020039	Slc5a2
18	76646305	76660811	+	NONRATT013940.2	18	76637784	76653056	-	ENSRNOG00000053370	Adnp2
19	57454555	57454947	-	NONRATT014825.2	19	57430130	57484742	-	ENSRNOG00000018884	Ttc13
14	81515896	81517008	-	NONRATT010035.2	14	81516406	81638934	-	ENSRNOG00000013832	Fam193a
X	15682652	15683492	-	NONRATT030897.2	X	15669190	15676050	+	ENSRNOG00000010092	Magix
6	133725511	133733670	+	NONRATT024637.2	6	133711153	133716847	-	ENSRNOG00000048751	Rtl1
5	145314283	145316034	+	NONRATT022642.2	5	145311374	145315185	+	ENSRNOG00000014352	Smim12
14	87412632	87417040	+	NONRATT009465.2	14	87312202	87421659	+	ENSRNOG00000059479	Adcy1
10	87056352	87057313	-	NONRATT005988.2	10	87057135	87067456	-	ENSRNOG00000010665	Ccr7
16	3100204	3101927	+	NONRATT011251.2	16	3051448	3105531	+	ENSRNOG00000014750	Fam208a
10	109526923	109527724	-	NONRATT006353.2	10	109519133	109520846	-	ENSRNOG00000036701	Actg1
19	25369671	25375377	-	NONRATT014562.2	19	25367542	25378974	-	ENSRNOG00000008319	Ccdc130
13	60399117	60400320	-	NONRATT008782.2	13	60403770	60496511	-	ENSRNOG00000003258	Cdc73
1	72357979	72358500	+	NONRATT002316.2	1	72363275	72366455	-	ENSRNOG00000028628	Zfp865
15	85946528	85962795	-	NONRATT011149.2	15	85930043	86105273	-	ENSRNOG00000009431	Tbc1d4
14	104514465	104523301	-	NONRATT010168.2	14	104505318	104523297	-	ENSRNOG00000027282	Cep68
5	159525481	159526071	+	NONRATT022814.2	5	159534201	159539750	+	ENSRNOG00000008257	Mfap2
16	6584367	6587624	+	NONRATT011267.2	16	6596578	6596679	-	ENSRNOG00000060064	U6
1	200111653	200112378	+	NONRATT001260.2	1	200037748	200116524	+	ENSRNOG00000020388	Inpp5f
20	3429881	3430444	-	NONRATT017525.2	20	3435965	3438360	-	ENSRNOG00000000826	Flot1
15	34233865	34237504	+	NONRATT010437.2	15	34234192	34244504	+	ENSRNOG00000018825	Dcaf11
6	2880470	2883639	-	NONRATT024761.2	6	2880517	2886465	-	ENSRNOG00000027360	Srsf7
10	45326420	45327068	+	NONRATT004334.2	10	45322247	45335030	+	ENSRNOG00000002915	Trim11
13	109513892	109520976	+	NONRATT008567.2	13	109505696	109520419	+	ENSRNOG00000003795	Angel2
16	8204617	8207449	-	NONRATT011766.2	16	8207222	8236292	+	ENSRNOG00000019760	Oxnad1
1	276373392	276546052	+	NONRATT001880.2	1	276310071	276487667	+	ENSRNOG00000042786	Vti1a
17	76992991	76994109	-	NONRATT013110.2	17	76995042	77093308	-	ENSRNOG00000017933	Ccdc3
8	128708012	128708264	-	NONRATT029084.2	8	128702132	128711221	-	ENSRNOG00000037085	Xirp1
3	3375689	3381885	-	NONRATT019063.2	3	3389611	3390443	+	ENSRNOG00000032635	LOC100360117
2	227718788	227719555	-	NONRATT016848.2	2	227719169	227719299	-	ENSRNOG00000053898	SNORA24
1	91363482	91365159	+	NONRATT000602.2	1	91363491	91366164	+	ENSRNOG00000010918	Cebpa
16	32225189	32225691	-	NONRATT011936.2	16	32062335	32227491	-	ENSRNOG00000010358	Sh3rf1
6	28543870	28544758	+	NONRATT024119.2	6	28515075	28544756	+	ENSRNOG00000003988	Dnajc27
2	116215339	116215707	-	NONRATT016299.2	2	116189861	116219750	-	ENSRNOG00000009057	Sec62
4	50682925	50684722	-	NONRATT021267.2	4	50674036	50674174	-	ENSRNOG00000041968	5S_rRNA
14	64694783	64695300	+	NONRATT009406.2	14	64686792	64739694	+	ENSRNOG00000004279	Adgra3
11	32298677	32299118	-	NONRATT006881.2	11	32306887	32307067	-	ENSRNOG00000061734	U2
20	27544746	27552164	-	NONRATT017738.2	20	27535323	27552349	-	ENSRNOG00000042916	Rwdd1
4	100302628	100303496	+	NONRATT020566.2	4	100297477	100303047	-	ENSRNOG00000013520	Mat2a
4	89149481	89150717	-	NONRATT021456.2	4	89149316	89151184	-	ENSRNOG00000007808	Nap1l5
10	84121230	84122057	+	NONRATT004794.2	10	84119883	84123390	+	ENSRNOG00000007573	Hoxb9
12	40741561	40742019	-	NONRATT008008.2	12	40713840	40822159	-	ENSRNOG00000001352	Hectd4
3	45407275	45411940	+	NONRATT018162.2	3	45277347	45414613	+	ENSRNOG00000005504	Pkp4
12	36754220	36761257	+	NONRATT007460.2	12	36734371	36760752	+	ENSRNOG00000000981	Scarb1
7	124791605	124794585	+	NONRATT026176.2	7	124758377	124929025	-	ENSRNOG00000011094	Efcab6
5	14356287	14356591	-	NONRATT023019.2	5	14262348	14356692	-	ENSRNOG00000030862	Atp6v1h
7	70558333	70558804	+	NONRATT025873.2	7	70556023	70571287	+	ENSRNOG00000025481	Dctn2
6	104873005	104878409	+	NONRATT024458.2	6	104718511	104877980	+	ENSRNOG00000005998	Smoc1
16	7000981	7001675	-	NONRATT011734.2	16	6992170	7007051	-	ENSRNOG00000017689	Itih3
5	153682687	153685131	-	NONRATT023713.2	5	153675623	153708114	-	ENSRNOG00000018194	Srrm1
1	89384741	89385749	-	NONRATT002527.2	1	89383518	89399041	-	ENSRNOG00000021053	Lsr
10	56187081	56195305	+	NONRATT004445.2	10	56187019	56198448	+	ENSRNOG00000010756	Tp53
1	161992562	161992796	-	NONRATT002936.2	1	161922192	162006949	+	ENSRNOG00000011476	Nars2
1	219413896	219414635	-	NONRATT003415.2	1	219406201	219412888	-	ENSRNOG00000021689	Rps6kb2
14	36147863	36149490	-	NONRATT009844.2	14	36071375	36149525	+	ENSRNOG00000002272	Lnx1
14	16637334	16686502	+	NONRATT009248.2	14	16622759	16903242	-	ENSRNOG00000002208	Shroom3
13	99471867	99472457	-	NONRATT009063.2	13	99410025	99468778	-	ENSRNOG00000003629	Nvl
8	48925394	48933798	+	NONRATT027630.2	8	48925603	48958026	+	ENSRNOG00000053932	Ddx6
9	82637266	82638875	+	NONRATT029546.2	9	82647070	82668920	+	ENSRNOG00000019985	Asic4
3	113423709	113424480	+	NONRATT018524.2	3	113428854	113445435	-	ENSRNOG00000014436	Ppip5k1
11	61994177	61996918	-	NONRATT006971.2	11	61971034	61987719	+	ENSRNOG00000056574	Tigit
1	281095140	281101536	-	NONRATT003956.2	1	281065167	281101438	-	ENSRNOG00000009523	Rab11fip2
1	195077105	195096710	-	NONRATT003128.2	1	195074329	195096694	-	ENSRNOG00000054391	Snurf
1	277191125	277218260	+	NONRATT001891.2	1	277104513	277181414	-	ENSRNOG00000016714	Nrap
16	11100188	11100713	+	NONRATT011320.2	16	11032530	11106589	+	ENSRNOG00000052513	Wapal
1	266032520	266033023	+	NONRATT001798.2	1	265904686	266033107	+	ENSRNOG00000026048	Gbf1
18	83501935	83502493	+	NONRATT013639.2	18	83471341	83584357	+	ENSRNOG00000014006	Neto1
1	263246518	263247598	-	NONRATT003797.2	1	263246247	263269762	-	ENSRNOG00000016356	Got1
1	78836767	78837275	+	NONRATT000394.2	1	78833156	78837623	+	ENSRNOG00000016756	Ptgir
6	107467941	107468329	+	NONRATT025222.2	6	107423217	107461041	-	ENSRNOG00000038183	Heatr4
5	152927613	152928396	+	NONRATT022726.2	5	152774854	152920343	-	ENSRNOG00000017087	Man1c1
4	157978266	157979021	-	NONRATT021863.2	4	157977161	158010166	-	ENSRNOG00000019556	Cd9
18	79409991	79410526	+	NONRATT013623.2	18	79326737	79407285	+	ENSRNOG00000016516	Mbp
3	110246404	110249559	-	NONRATT019587.2	3	110245935	110249627	-	ENSRNOG00000007512	Srp14
5	153276208	153276899	+	NONRATT022733.2	5	153269525	153277563	+	ENSRNOG00000060597	Syf2
16	60196967	60205561	-	NONRATT012039.2	16	60128200	60208462	-	ENSRNOG00000011431	Mfhas1
3	12020691	12022039	-	NONRATT019198.2	3	12011109	12011239	+	ENSRNOG00000054973	SNORA65
8	55152910	55153312	-	NONRATT028546.2	8	55094513	55162421	-	ENSRNOG00000010260	Dixdc1
1	198866277	198868667	-	NONRATT003212.2	1	198866136	198869009	-	ENSRNOG00000018379	Zfp688
1	199294582	199295186	+	NONRATT001239.2	1	199287894	199294979	+	ENSRNOG00000019302	Stx4
10	82136581	82137773	-	NONRATT005894.2	10	82129505	82197848	-	ENSRNOG00000060528	Cacna1g
10	94445862	94450165	+	NONRATT004988.2	10	94448340	94448466	+	ENSRNOG00000053830	SNORA51
4	117253303	117254143	-	NONRATT021564.2	4	117256769	117268178	-	ENSRNOG00000033202	Fbxo41
12	38284306	38286646	+	NONRATT007492.2	12	38274348	38294292	+	ENSRNOG00000001238	Rsrc2
5	59508391	59508718	+	NONRATT022230.2	5	59512871	59543101	-	ENSRNOG00000014365	Gne
16	82177810	82184222	-	ENSRNOT00000092096	16	82184386	82245038	+	ENSRNOG00000017085	Tubgcp3
5	33603018	33604487	-	NONRATT023097.2	5	33581027	33604564	+	ENSRNOG00000025145	Rmdn1
9	101583396	102613788	-	NONRATT030322.2	9	102542593	102542690	-	ENSRNOG00000051658	SNORA17
20	2082259	2082739	-	NONRATT017491.2	20	2057688	2079467	+	ENSRNOG00000022107	RT1-M6-1
6	135288639	135290798	+	NONRATT025368.2	6	135290529	135304422	-	ENSRNOG00000008035	Cinp
14	19441391	19442174	+	NONRATT009268.2	14	19434752	19446376	+	ENSRNOG00000003052	Cox18
2	98427390	98427742	-	NONRATT016249.2	2	98423568	98610368	-	ENSRNOG00000008765	Zfhx4
2	48487711	48488611	-	NONRATT016113.2	2	48487735	48501436	-	ENSRNOG00000012556	Isl1
5	107289155	107291659	+	ENSRNOT00000079931	5	107288648	107289081	-	ENSRNOG00000052092	AABR07049134.2
2	211480119	211482147	-	NONRATT016789.2	2	211460372	211478007	+	ENSRNOG00000020360	Clcc1
15	42972970	42974099	+	NONRATT011005.2	15	42960306	42976792	+	ENSRNOG00000009449	Trim35
14	37253870	37262829	-	NONRATT009854.2	14	37213827	37294472	-	ENSRNOG00000002152	Dcun1d4
5	57777763	57779315	-	NONRATT023155.2	5	57738320	57778723	+	ENSRNOG00000012004	Ubap1
16	47667676	47670935	+	NONRATT011498.2	16	47665815	47669093	+	ENSRNOG00000022736	Cdkn2aip
1	101685229	101685640	+	NONRATT000708.2	1	101688296	101692804	+	ENSRNOG00000021027	Dbp
9	41307747	41311197	-	NONRATT029906.2	9	41305569	41337498	-	ENSRNOG00000023467	Fam168b
15	34447172	34447565	-	NONRATT010908.2	15	34452115	34453171	+	ENSRNOG00000020399	Ltb4r
1	198911043	198913964	+	NONRATT001223.2	1	198911910	198916184	+	ENSRNOG00000018518	Prr14
19	41944010	41944700	+	NONRATT014261.2	19	41941076	41960083	-	ENSRNOG00000000262	Zfp821
10	56618526	56619924	-	NONRATT005607.2	10	56605139	56609233	+	ENSRNOG00000017657	Phf23
20	5162969	5163659	-	NONRATT017577.2	20	5139889	5153399	-	ENSRNOG00000000852	Prrc2a
20	45326735	45334876	-	NONRATT017812.2	20	45321404	45342948	-	ENSRNOG00000000587	Rpf2
10	71341692	71344988	-	NONRATT005788.2	10	71342034	71358190	-	ENSRNOG00000058372	Ac1576
4	182744428	182744786	-	NONRATT021992.2	4	182745447	182746381	+	ENSRNOG00000031041	Rps4y2
12	38412314	38412861	+	NONRATT007500.2	12	38377033	38452652	+	ENSRNOG00000001247	Clip1
13	1945659	1946053	-	NONRATT008598.2	13	1942659	1946683	-	ENSRNOG00000032307	Dsel
8	48652231	48659314	+	NONRATT027619.2	8	48644261	48652071	-	ENSRNOG00000009719	C2cd2l
X	71174856	71175959	+	NONRATT030578.2	X	71183886	71187623	+	ENSRNOG00000003848	Med12
4	21884315	21884934	+	NONRATT020185.2	4	21862312	21902762	+	ENSRNOG00000005908	Dmtf1
11	68568567	68570605	-	NONRATT007033.2	11	68493034	68578995	+	ENSRNOG00000032327	Pdia5
X	71307729	71308109	-	NONRATT031060.2	X	71299661	71313530	-	ENSRNOG00000003707	Zmym3
12	40621699	40622373	-	NONRATT008004.2	12	40619376	40625883	+	ENSRNOG00000001348	Erp29
5	144255586	144257594	-	NONRATT023605.2	5	144250418	144274981	-	ENSRNOG00000010237	Map7d1
13	99221003	99221753	-	NONRATT009058.2	13	99220509	99253176	+	ENSRNOG00000003310	Tmem63a
5	172519534	172526458	-	NONRATT023935.2	5	172488707	172547058	+	ENSRNOG00000014642	Morn1
X	15462620	15463125	-	NONRATT030881.2	X	15449187	15452937	+	ENSRNOG00000007766	Pqbp1
1	240932606	240934980	+	NONRATT001612.2	1	240908482	240933198	+	ENSRNOG00000014215	Klf9
7	13045273	13048688	+	NONRATT025601.2	7	13039903	13055632	+	ENSRNOG00000000175	Mier2
1	164573195	164574562	+	NONRATT000994.2	1	164502388	164593139	+	ENSRNOG00000030404	Arrb1
7	26602904	26603254	+	NONRATT025684.2	7	26522313	26607861	+	ENSRNOG00000008713	Slc41a2
9	46671041	46671383	+	NONRATT029336.2	9	46657921	46782545	+	ENSRNOG00000014013	Map4k4
7	51424202	51425672	-	NONRATT026732.2	7	51404918	51515373	-	ENSRNOG00000004925	Ppp1r12a
7	139715477	139716303	+	NONRATT026269.2	7	139685572	139721950	+	ENSRNOG00000057988	Pfkm
5	59068763	59069547	-	NONRATT023196.2	5	59068080	59079719	-	ENSRNOG00000016364	Gba2
10	57647517	57653916	-	NONRATT005641.2	10	57622021	57638485	-	ENSRNOG00000007054	Dhx33
10	89002153	89003011	-	NONRATT006037.2	10	89002115	89005213	-	ENSRNOG00000020022	Psmc3ip
18	40519301	40557948	+	NONRATT013408.2	18	40542093	40542431	+	ENSRNOG00000056247	7SK
7	63659422	63661250	-	NONRATT026791.2	7	63655246	63687978	-	ENSRNOG00000005528	Tbk1
4	87048147	87048744	+	NONRATT020507.2	4	87048854	87048962	-	ENSRNOG00000056206	U6
6	143909820	143913762	+	NONRATT024724.2	6	143901279	143917575	+	ENSRNOG00000004268	Zfp386
12	45217944	45220308	+	NONRATT007591.2	12	45199576	45221512	+	ENSRNOG00000001139	Suds3
6	132069050	132089979	-	NONRATT025331.2	6	132023944	132075875	-	ENSRNOG00000006587	LOC100910833
2	256899211	256899721	-	NONRATT016947.2	2	256897777	256915563	-	ENSRNOG00000022218	Ifi44
10	89102841	89104634	+	NONRATT004901.2	10	89089645	89103614	+	ENSRNOG00000020277	Cntnap1
13	25514439	25542221	-	NONRATT008632.2	13	25513891	25652473	-	ENSRNOG00000014866	Pign
17	19538186	19540029	+	NONRATT012370.2	17	19543274	19580929	-	ENSRNOG00000017250	Gmpr
4	120825703	120826314	-	NONRATT021609.2	4	120785494	120817377	-	ENSRNOG00000016255	Podxl2
9	93371671	93374520	-	NONRATT030247.2	9	93370598	93370678	-	ENSRNOG00000060216	SNORD20
3	164341720	164342262	-	NONRATT019995.2	3	164343832	164366684	-	ENSRNOG00000025580	LOC100362142
2	84681991	84682313	+	NONRATT015130.2	2	84678947	84693988	+	ENSRNOG00000022347	Fam173b
5	141157688	141158273	-	NONRATT023584.2	5	141040751	141229781	-	ENSRNOG00000016047	Macf1
10	10835879	10836659	+	NONRATT004007.2	10	10829866	10831782	-	ENSRNOG00000003224	Nudt16l1
X	15187252	15187691	+	NONRATT030446.2	X	15171498	15185191	+	ENSRNOG00000039576	Suv39h1l1
1	255664713	255665682	-	NONRATT003735.2	1	255579473	255654932	+	ENSRNOG00000017938	Btaf1
10	25860699	25861923	-	NONRATT005357.2	10	25861489	25890639	-	ENSRNOG00000059894	Hmmr
11	45463843	45464756	-	NONRATT006942.2	11	45401402	45459821	+	ENSRNOG00000001642	Tbc1d23
1	265298913	265312520	+	NONRATT001780.2	1	265318525	265420503	-	ENSRNOG00000046211	Fbxw4
5	7798356	7798888	-	NONRATT022991.2	5	7628237	7941822	-	ENSRNOG00000005391	Prex2
9	53443000	53443652	+	NONRATT029373.2	9	53440271	53440595	+	ENSRNOG00000038738	LOC685203
20	4093099	4093555	+	NONRATT017073.2	20	4096431	4097190	+	ENSRNOG00000033215	RT1-Db1
8	44171216	44171594	-	NONRATT027734.2	8	44165366	44327551	-	ENSRNOG00000053577	Gramd1b
2	187766830	187767186	-	NONRATT016561.2	2	187772012	187786712	-	ENSRNOG00000025269	Slc25a44
14	12206747	12218916	+	NONRATT009237.2	14	12218552	12315229	+	ENSRNOG00000002361	Prkg2
1	196852662	196853380	+	NONRATT001190.2	1	196839320	196854180	+	ENSRNOG00000015180	Kdm8
3	150188329	150228184	+	NONRATT018787.2	3	150188454	150227405	+	ENSRNOG00000046585	AABR07054370.1
7	117325086	117326111	+	NONRATT026045.2	7	117326278	117349957	+	ENSRNOG00000029590	Spatc1
3	154417249	154424473	+	NONRATT019889.2	3	154395186	154424625	+	ENSRNOG00000034031	Vstm2l
13	88315174	88315838	-	NONRATT008937.2	13	88288045	88307988	-	ENSRNOG00000002826	Hsd17b7
8	57248616	57250884	-	NONRATT028564.2	8	57248619	57255263	-	ENSRNOG00000025463	LOC100125362
18	27114768	27119064	+	NONRATT013314.2	18	27047417	27105531	+	ENSRNOG00000020423	Apc
13	51579676	51581940	+	NONRATT008235.2	13	51534024	51578052	+	ENSRNOG00000004756	Syt2
6	135545291	135548316	+	NONRATT025366.2	6	135549136	135552144	+	ENSRNOG00000049783	Rcor1
1	255066993	255086235	+	NONRATT001691.2	1	254974788	255086207	+	ENSRNOG00000018532	Pcgf5
14	7219317	7219980	+	NONRATT009203.2	14	7226585	7325645	-	ENSRNOG00000002232	Aff1
6	111145874	111150804	-	NONRATT025246.2	6	111135348	111176918	-	ENSRNOG00000012146	Pomt2
17	22281406	22281740	-	NONRATT012874.2	17	22278797	22311392	-	ENSRNOG00000014460	Hivep1
1	273732788	273733176	-	NONRATT003912.2	1	273708216	273758247	-	ENSRNOG00000012084	Xpnpep1
8	94863282	94874231	-	NONRATT028848.2	8	94821246	94857057	+	ENSRNOG00000010545	Mrap2
2	219817889	219818333	-	NONRATT015722.2	2	219788233	219842986	-	ENSRNOG00000016214	Agl
1	222198129	222200456	+	NONRATT001485.2	1	222198533	222207453	+	ENSRNOG00000021147	Bad
1	100781199	100783007	+	NONRATT000673.2	1	100755681	100783004	+	ENSRNOG00000026517	Vrk3
10	51681516	51682010	-	NONRATT005541.2	10	51685227	51778939	-	ENSRNOG00000003669	Myocd
15	42671813	42673057	-	NONRATT010534.2	15	42671202	42693694	-	ENSRNOG00000016648	Gulo
16	48231703	48232776	+	NONRATT011504.2	16	48121429	48222285	+	ENSRNOG00000009590	Stox2
5	173646049	173647542	-	NONRATT023959.2	5	173654859	173659675	-	ENSRNOG00000020302	Klhl17
X	123772427	123773474	+	NONRATT030773.2	X	123773435	123788898	-	ENSRNOG00000006899	Akap14
9	95076676	95092615	-	NONRATT030259.2	9	95072111	95143092	-	ENSRNOG00000018395	Usp40
4	160535029	160706905	-	NONRATT020952.2	4	160530725	160605107	-	ENSRNOG00000051620	Tspan9
19	38306852	38307354	-	NONRATT014648.2	19	38237964	38321528	-	ENSRNOG00000000257	Smpd3
9	75018404	75019552	-	NONRATT030125.2	9	75021789	75528644	-	ENSRNOG00000014248	Erbb4
5	148342890	148343285	+	NONRATT022673.2	5	148320437	148343886	+	ENSRNOG00000013972	Pef1
2	156682541	156793497	-	NONRATT016445.2	2	156792499	156807305	-	ENSRNOG00000059120	AABR07011031.1
19	41565073	41565825	-	NONRATT014680.2	19	41559486	41567013	-	ENSRNOG00000016971	Zfp612
8	129608527	129608928	+	NONRATT028184.2	8	129617811	129627372	+	ENSRNOG00000054172	Ctnnb1
19	43750746	43834328	+	NONRATT014286.2	19	43826992	43848937	-	ENSRNOG00000019036	Ldhd
13	52667339	52680873	+	NONRATT008253.2	13	52667968	52680794	+	ENSRNOG00000033734	Tnnt2
8	67768273	67771417	-	NONRATT028673.2	8	67771719	67869019	-	ENSRNOG00000034272	Pias1
10	55962133	55964452	-	NONRATT005567.2	10	55943445	55965216	-	ENSRNOG00000009722	Chd3
1	185528478	185529391	+	NONRATT001130.2	1	185356974	185538694	+	ENSRNOG00000024602	Plekha7
1	136739206	136841574	-	NONRATT002769.2	1	136805482	136805785	+	ENSRNOG00000057041	7SK
1	61349454	61367704	+	NONRATT000258.2	1	61374378	61377590	+	ENSRNOG00000042347	Zfp53
10	83304743	83309088	+	NONRATT004785.2	10	83313215	83313466	+	ENSRNOG00000060404	AABR07030378.1
10	45182939	45183808	+	NONRATT004327.2	10	45169408	45185411	+	ENSRNOG00000051868	Gm12258
10	75719316	75719711	-	NONRATT004710.2	10	75681392	76039964	-	ENSRNOG00000025338	Msi2
X	124860175	124860567	-	NONRATT031279.2	X	124832627	124870329	-	ENSRNOG00000002585	Cul4b
7	137806065	137806823	-	NONRATT027282.2	7	137804018	137856485	-	ENSRNOG00000005263	LOC688906
14	10421511	10445693	-	NONRATT009741.2	14	10440690	10446909	-	ENSRNOG00000002178	Mrps18c
9	119880821	119881374	+	NONRATT029750.2	9	119840325	119871382	-	ENSRNOG00000013727	Ndc80
8	87261373	87261859	-	NONRATT028812.2	8	87268180	87282156	-	ENSRNOG00000011521	Filip1
18	29505137	29507021	+	NONRATT013363.2	18	29506127	29509296	+	ENSRNOG00000002908	Slc35a4
4	58813139	58813529	+	NONRATT020334.2	4	58693383	58817691	+	ENSRNOG00000054514	Mkln1
5	92038215	92039002	-	NONRATT023332.2	5	92038049	92039146	-	ENSRNOG00000023946	Tmem261
17	5606534	5606797	+	NONRATT012217.2	17	5513929	5614435	+	ENSRNOG00000018651	Agtpbp1
10	45564431	45579147	-	NONRATT005476.2	10	45563546	45579029	-	ENSRNOG00000060229	Arf1
20	20376222	20378753	-	NONRATT017721.2	20	20259262	20480623	+	ENSRNOG00000053288	Ank3
4	157355808	157358111	-	NONRATT021838.2	4	157332739	157347803	-	ENSRNOG00000015409	LOC100911959
1	247063837	247110516	-	NONRATT003691.2	1	247084227	247087077	+	ENSRNOG00000015268	Ppapdc2
5	166209743	166210242	-	NONRATT023873.2	5	166156032	166259069	-	ENSRNOG00000014986	Ube4b
10	107364996	107373393	-	NONRATT006321.2	10	107363510	107376645	-	ENSRNOG00000033143	Cep295nl
9	78332714	78342157	-	NONRATT030134.2	9	78294833	78369031	-	ENSRNOG00000014960	Bard1
8	65508024	65508393	-	NONRATT028654.2	8	65481591	65587427	-	ENSRNOG00000012015	Lrrc49
1	81437996	81438766	+	NONRATT000470.2	1	81447986	81450094	-	ENSRNOG00000024065	Zfp575
13	52624913	52635019	+	NONRATT008246.2	13	52624877	52637297	+	ENSRNOG00000009073	Tnni1
3	23075469	23075954	-	NONRATT019258.2	3	23033774	23066658	-	ENSRNOG00000013232	Nr6a1
2	30440575	30440940	-	NONRATT016030.2	2	30376418	30458542	-	ENSRNOG00000033693	Naip6
7	130067753	130068264	+	NONRATT026222.2	7	130071121	130082014	+	ENSRNOG00000060120	Selo
9	16649296	16649544	+	NONRATT029194.2	9	16647597	16661464	+	ENSRNOG00000018168	Klc4
3	2678989	2679769	-	NONRATT019039.2	3	2678955	2680622	-	ENSRNOG00000015294	RGD1306215
10	56578984	56582007	-	NONRATT005603.2	10	56591291	56600232	+	ENSRNOG00000017352	Ctdnep1
16	49561675	49563317	-	NONRATT011991.2	16	49543141	49574390	-	ENSRNOG00000012658	Pdlim3
14	2044001	2045139	-	NONRATT009675.2	14	2050482	2056089	+	ENSRNOG00000000041	Slc26a1
20	3306817	3307262	-	ENSRNOT00000092081	20	3300290	3306395	+	ENSRNOG00000025806	Prr3
8	122245221	122245589	-	NONRATT029053.2	8	122197026	122240357	+	ENSRNOG00000009729	Ubp1
2	178360030	178362967	+	NONRATT015364.2	2	178354889	178366685	+	ENSRNOG00000027408	Ppid
17	43632392	43632703	+	NONRATT012479.2	17	43626127	43626538	-	ENSRNOG00000050478	Hist1h3a
4	66443476	66444595	-	NONRATT021349.2	4	66445265	66624912	-	ENSRNOG00000007034	Hipk2
12	38245170	38245809	-	NONRATT007960.2	12	38200462	38274036	-	ENSRNOG00000033658	Kntc1
1	225925941	225937826	-	NONRATT003558.2	1	225925772	225948626	-	ENSRNOG00000032929	Incenp
5	122492048	122493302	+	NONRATT022437.2	5	122390521	122491203	+	ENSRNOG00000006357	Sgip1
4	118432680	118433287	+	NONRATT020671.2	4	118431754	118432775	+	ENSRNOG00000017710	AC139642.1
5	154266262	154266976	+	NONRATT022744.2	5	154260061	154268124	+	ENSRNOG00000009260	Cnr2
5	128180680	128182084	-	NONRATT023463.2	5	128190707	128210445	+	ENSRNOG00000008841	Orc1
19	59876341	59876772	-	NONRATT014847.2	19	59863420	59873411	-	ENSRNOG00000019980	Tomm20
17	49722001	49722579	+	NONRATT012496.2	17	49714293	49727664	+	ENSRNOG00000013454	Rala
7	108549039	108549536	-	NONRATT026985.2	7	108549154	108551589	-	ENSRNOG00000054367	AABR07058287.1
7	40217268	40219069	+	NONRATT025757.2	7	40171962	40217056	-	ENSRNOG00000006749	Tmtc3
10	85333668	85337115	+	NONRATT004821.2	10	85301874	85330397	+	ENSRNOG00000059008	Socs7
10	57231894	57233699	+	NONRATT004496.2	10	57218086	57237775	+	ENSRNOG00000033508	Mink1
13	78918327	78918762	+	NONRATT008385.2	13	78921201	78929624	-	ENSRNOG00000002875	Klhl20
7	40222158	40224630	+	NONRATT025758.2	7	40171962	40217056	-	ENSRNOG00000006749	Tmtc3
X	71098387	71099060	-	NONRATT031053.2	X	70994076	71127278	-	ENSRNOG00000004036	Snx12
5	103478856	103479773	-	NONRATT023363.2	5	103479766	103654247	+	ENSRNOG00000006761	Sh3gl2
1	59140549	59140850	+	NONRATT000246.2	1	59129950	59146776	+	ENSRNOG00000012692	Riok2
11	83921582	83926546	-	NONRATT007148.2	11	83908108	83926524	-	ENSRNOG00000001738	Eif4g1
20	22084664	22085275	+	NONRATT017351.2	20	22060223	22086108	+	ENSRNOG00000000638	Zfp365
19	37014860	37015685	-	NONRATT014615.2	19	37025374	37034285	+	ENSRNOG00000013808	Ces2g
11	79513213	79513646	-	NONRATT006685.2	11	79205729	79703736	-	ENSRNOG00000031669	Lpp
2	210977116	210977464	+	NONRATT015696.2	2	210977937	210982579	+	ENSRNOG00000045665	Amigo1
18	29491967	29492725	+	NONRATT013362.2	18	29494013	29497410	-	ENSRNOG00000018089	Sra1
10	67058059	67058728	-	NONRATT004598.2	10	66942397	67048308	+	ENSRNOG00000014135	Rab11fip4
13	48065266	48066716	-	NONRATT008682.2	13	48031409	48056394	-	ENSRNOG00000025100	Ikbke
3	177040782	177044195	+	NONRATT018990.2	3	177040706	177043381	+	ENSRNOG00000015202	Dnajc5
1	281370827	281376834	-	NONRATT003959.2	1	281347535	281376834	-	ENSRNOG00000009830	Fam204a
10	43511327	43511557	+	NONRATT004312.2	10	43502930	43512287	-	ENSRNOG00000027259	Faxdc2
9	27381672	27382134	-	NONRATT029859.2	9	27368271	27447877	-	ENSRNOG00000013484	Gsta1
15	89260230	89261019	-	NONRATT011165.2	15	89268279	89339323	-	ENSRNOG00000009836	Rbm26
6	29129392	29129785	+	NONRATT024900.2	6	29106140	29162330	+	ENSRNOG00000058973	Atad2b
6	41023179	41023572	-	NONRATT024919.2	6	41016729	41039437	-	ENSRNOG00000004110	Trib2
18	74350607	74352447	+	NONRATT013607.2	18	74299930	74395547	+	ENSRNOG00000052894	Epg5
10	46168677	46172114	-	NONRATT005484.2	10	46154744	46172166	-	ENSRNOG00000003302	Flcn
10	76361726	76365407	+	NONRATT005821.2	10	76363796	76364091	+	ENSRNOG00000059270	AC119015.2
2	88385987	88387277	-	NONRATT016222.2	2	88384795	88414012	-	ENSRNOG00000010891	Lrrcc1
3	173961634	173962061	+	NONRATT020084.2	3	173969272	174019766	+	ENSRNOG00000053332	Cdh26
19	17364969	17367329	-	NONRATT014495.2	19	17357745	17357874	+	ENSRNOG00000053426	SNORA17
2	78214960	78253049	+	NONRATT015112.2	2	78262838	78276927	+	ENSRNOG00000010589	Fam134b
4	118493999	118500987	-	NONRATT021575.2	4	118495004	118534280	-	ENSRNOG00000017838	Gmcl1
8	61813699	61814375	+	NONRATT027724.2	8	61805696	61816800	+	ENSRNOG00000030654	Man2c1
4	159367219	159367584	-	NONRATT020960.2	4	159371258	159399634	-	ENSRNOG00000061684	Ndufa9
16	37135369	37136841	-	NONRATT011963.2	16	37131344	37159745	-	ENSRNOG00000010502	Fbxo8
18	41152061	41152818	+	NONRATT013411.2	18	41022551	41154932	+	ENSRNOG00000003958	Commd10
10	46560135	46560666	+	NONRATT004353.2	10	46511270	46571583	+	ENSRNOG00000060615	Rai1
14	38230957	38233060	+	NONRATT009335.2	14	38192869	38233852	+	ENSRNOG00000058588	Nfxl1
9	95350720	95352856	-	NONRATT030263.2	9	95349085	95362014	-	ENSRNOG00000022911	Hjurp
1	266048833	266050145	-	NONRATT003861.2	1	266053001	266059256	+	ENSRNOG00000019311	Nfkb2
5	60589906	60590289	-	NONRATT023208.2	5	60572557	60588243	+	ENSRNOG00000012664	Polr1e
6	138006387	138007961	+	NONRATT024719.2	6	137997334	137998291	+	ENSRNOG00000005174	Tmem121
18	76837004	76854575	-	NONRATT013588.2	18	76809143	76878981	-	ENSRNOG00000053640	Kcng2
11	44211562	44212316	-	NONRATT006937.2	11	44192939	44237100	+	ENSRNOG00000001653	St3gal6
2	225864460	225866279	+	NONRATT015753.2	2	225854628	225866357	+	ENSRNOG00000025025	Dnttip2
16	7095148	7095967	+	NONRATT011277.2	16	7099929	7100009	-	ENSRNOG00000057398	SNORD19B
9	99136057	99152772	-	NONRATT030294.2	9	99150764	99150904	+	ENSRNOG00000052997	SNORA44
5	168937229	168938265	-	NONRATT023899.2	5	168947201	169017295	-	ENSRNOG00000042627	Camta1
12	1678618	1680164	-	NONRATT007674.2	12	1682526	1816414	-	ENSRNOG00000029986	Insr
15	104227436	104229705	+	NONRATT010678.2	15	104186852	104226434	+	ENSRNOG00000010352	Dnajc3
4	48879767	48927622	-	NONRATT021258.2	4	48852826	48928372	-	ENSRNOG00000059016	Tspan12
15	33091670	33104082	+	NONRATT010404.2	15	33074440	33083655	+	ENSRNOG00000010947	Mmp14
9	73334908	73444452	+	NONRATT030121.2	9	73378056	73459371	+	ENSRNOG00000011841	Map2
19	37813776	37814188	+	NONRATT014219.2	19	37812750	37819789	-	ENSRNOG00000024178	Cenpt
5	81722794	81751893	-	NONRATT023317.2	5	81732194	81732301	-	ENSRNOG00000060805	U6
5	173078811	173079279	-	NONRATT023941.2	5	173052062	173078046	+	ENSRNOG00000017213	Cdk11b
14	92495747	92501423	+	NONRATT009571.2	14	92342997	92495894	-	ENSRNOG00000004281	Cobl
6	43719043	43720220	+	NONRATT024215.2	6	43644829	43722113	+	ENSRNOG00000061415	Taf1b
4	162941706	162942462	+	NONRATT020814.2	4	162937773	162943981	+	ENSRNOG00000059538	Clec2g
15	12412180	12414061	+	NONRATT010288.2	15	12407523	12416105	+	ENSRNOG00000006751	Psmd6
15	33729324	33731472	-	NONRATT010880.2	15	33721319	33725188	-	ENSRNOG00000025634	Zfhx2
6	25100497	25102457	+	NONRATT024063.2	6	25074954	25100977	+	ENSRNOG00000007744	Ehd3
18	3555189	3555685	-	NONRATT013661.2	18	3565165	3590739	+	ENSRNOG00000023376	Riok3
2	198040793	198045314	+	NONRATT015572.2	2	198040535	198057003	+	ENSRNOG00000021168	Anp32e
15	34286122	34286537	+	NONRATT010442.2	15	34270647	34282495	+	ENSRNOG00000019438	Rnf31
9	71419387	71421708	+	NONRATT030101.2	9	71398709	71434493	+	ENSRNOG00000023807	Ccnyl1
8	113945196	113955770	-	NONRATT028931.2	8	113939885	113954832	+	ENSRNOG00000013059	Aste1
7	125853575	125854426	-	NONRATT027197.2	7	125857045	125893168	-	ENSRNOG00000031269	RGD1304694
20	30802917	30803412	+	NONRATT017389.2	20	30812352	30888735	-	ENSRNOG00000000563	Adamts14
2	186601093	186601725	-	NONRATT016536.2	2	186595050	186606172	-	ENSRNOG00000016164	Fcrl2
1	162352420	162360952	+	NONRATT000969.2	1	162342050	162362141	+	ENSRNOG00000012292	Alg8
11	70286420	70286832	-	NONRATT007051.2	11	70236887	70322690	-	ENSRNOG00000001793	Heg1
2	104946631	104952524	-	NONRATT016269.2	2	104917142	104958034	-	ENSRNOG00000011146	Gyg1
1	78758740	78758962	+	NONRATT000387.2	1	78739929	78765692	+	ENSRNOG00000016145	Strn4
10	90026391	90030628	-	NONRATT006073.2	10	90000053	90030423	-	ENSRNOG00000059683	Mpp2
1	216681414	216682497	+	NONRATT001381.2	1	216677372	216700641	+	ENSRNOG00000020562	Slc22a18
1	102670031	102670901	-	NONRATT002678.2	1	102669867	102699442	-	ENSRNOG00000011672	Tph1
8	55308760	55310390	-	NONRATT028553.2	8	55279372	55301320	+	ENSRNOG00000010922	Ppp2r1b
12	22665157	22673831	+	NONRATT007374.2	12	22677606	22680630	-	ENSRNOG00000001416	LOC100909521
16	54042231	54043394	-	NONRATT012005.2	16	54040846	54137660	-	ENSRNOG00000010155	Pcm1
8	91314947	91315349	-	NONRATT028825.2	8	91310629	91338843	-	ENSRNOG00000009773	Elovl4
10	105114131	105114596	-	NONRATT006285.2	10	105123326	105228547	-	ENSRNOG00000009351	Srp68
1	88884748	88887298	+	NONRATT000581.2	1	88885936	88892615	+	ENSRNOG00000025111	Nfkbid
2	123271349	123276628	+	NONRATT015234.2	2	123275882	123281856	-	ENSRNOG00000015423	Ccna2
3	152616756	152617149	+	NONRATT019872.2	3	152626756	152648244	+	ENSRNOG00000020086	Aar2
7	9774948	9775526	-	NONRATT026414.2	7	9747420	9834707	-	ENSRNOG00000051152	LOC102549817
5	150726836	150727679	+	NONRATT022694.2	5	150719568	150723321	-	ENSRNOG00000013300	Atpif1
2	22430343	22430842	+	NONRATT014924.2	2	22427473	22435307	+	ENSRNOG00000023837	Mtx3
17	795752	825062	+	NONRATT012177.2	17	833508	955615	-	ENSRNOG00000016889	Fancc
3	8547555	8552697	+	NONRATT017983.2	3	8547348	8598918	+	ENSRNOG00000015396	Sptan1
6	9481689	9482429	-	NONRATT024798.2	6	9483593	9491667	+	ENSRNOG00000060463	AABR07062799.2
8	116869465	116869858	-	NONRATT028987.2	8	116862624	116872215	-	ENSRNOG00000029572	Apeh
20	7151595	7152345	-	NONRATT017620.2	20	7140244	7142213	-	ENSRNOG00000054374	AC095263.1
8	128807127	128808756	+	NONRATT028168.2	8	128790347	128802986	+	ENSRNOG00000018552	Slc25a38
5	59069813	59070229	+	NONRATT022219.2	5	59068080	59079719	-	ENSRNOG00000016364	Gba2
12	18532106	18534765	+	NONRATT007339.2	12	18531989	18534836	+	ENSRNOG00000028166	Asmtl
10	82129075	82131828	-	NONRATT005892.2	10	82129505	82197848	-	ENSRNOG00000060528	Cacna1g
6	86808604	86810187	+	NONRATT024335.2	6	86785770	86810316	+	ENSRNOG00000004521	Prpf39
16	6789103	6789510	+	NONRATT011272.2	16	6779280	6895299	+	ENSRNOG00000016645	Sfmbt1
4	66238599	66241527	+	NONRATT020370.2	4	66165844	66233230	+	ENSRNOG00000005564	Ubn2
1	265904651	265966833	+	NONRATT001789.2	1	265925646	265925753	-	ENSRNOG00000059887	U6
1	264778116	264778720	-	NONRATT003832.2	1	264776397	264794938	-	ENSRNOG00000032946	Pdzd7
10	10825229	10829495	+	NONRATT004005.2	10	10829866	10831782	-	ENSRNOG00000003224	Nudt16l1
15	4893106	4893883	+	NONRATT010260.2	15	4894212	4951917	-	ENSRNOG00000000341	Nid2
16	7728622	7734927	-	NONRATT011760.2	16	7714464	7758189	-	ENSRNOG00000019630	Hacl1
5	140651905	140656832	+	NONRATT022595.2	5	140642884	140657745	-	ENSRNOG00000014008	Mfsd2a
18	29497865	29501118	-	NONRATT013761.2	18	29506127	29509296	+	ENSRNOG00000002908	Slc35a4
1	265527050	265527765	-	NONRATT003849.2	1	265507450	265542276	-	ENSRNOG00000017822	Mgea5
4	65640007	65643047	+	NONRATT020366.2	4	65637406	65684743	+	ENSRNOG00000013251	Trim24
X	88312690	88314544	-	NONRATT031122.2	X	88298265	88309290	+	ENSRNOG00000037770	AABR07039936.1
5	146922565	146923434	+	NONRATT022648.2	5	146882755	146931444	+	ENSRNOG00000006004	Phc2
3	147713900	147743513	+	NONRATT018732.2	3	147713820	147757862	+	ENSRNOG00000005276	Csnk2a1
11	37798424	37799673	+	NONRATT006502.2	11	37798369	37880821	+	ENSRNOG00000001953	Bace2
13	83866816	83867566	-	NONRATT008909.2	13	83855443	83917021	-	ENSRNOG00000003283	Rcsd1
11	31856965	31867960	-	NONRATT006877.2	11	31837838	31847490	-	ENSRNOG00000002012	Donson
16	21263999	21266056	+	NONRATT011433.2	16	21275310	21282246	+	ENSRNOG00000020602	Ndufa13
11	81797312	81797693	+	NONRATT006701.2	11	81769177	81794366	+	ENSRNOG00000026458	Tbccd1
8	132245995	132246430	+	NONRATT028224.2	8	132241133	132246694	+	ENSRNOG00000004540	LOC100912012
1	166871056	166871827	+	NONRATT001043.2	1	166739635	166866093	+	ENSRNOG00000019693	Clpb
20	3170033	3199279	-	ENSRNOT00000087909	20	3167078	3170945	+	ENSRNOG00000000795	RT1-N3
8	103877710	103878935	+	NONRATT027957.2	8	103774357	103878899	+	ENSRNOG00000042951	LOC100911537
16	47667427	47668184	+	NONRATT011497.2	16	47665815	47669093	+	ENSRNOG00000022736	Cdkn2aip
3	142775049	142776135	-	NONRATT019758.2	3	142781423	142783593	-	ENSRNOG00000024799	Cd93
17	5382009	5409481	+	NONRATT012209.2	17	5411806	5463158	-	ENSRNOG00000018417	Naa35
5	160323743	160324632	-	NONRATT023803.2	5	160325106	160352927	-	ENSRNOG00000012503	Dnajc16
8	132106952	132107753	+	NONRATT028220.2	8	132032943	132103927	+	ENSRNOG00000060356	Kif15
1	65675935	65677200	-	NONRATT002252.2	1	65677620	65681440	-	ENSRNOG00000031113	Zscan22
10	3362056	3363752	+	NONRATT003975.2	10	3338826	3357087	+	ENSRNOG00000003285	Mpv17l
5	156416280	156461381	+	NONRATT022776.2	5	156439632	156563827	+	ENSRNOG00000014368	Eif4g3
19	39353334	39354425	-	NONRATT014663.2	19	39357813	39391672	+	ENSRNOG00000011142	Cyb5b
3	119583817	119588033	-	NONRATT019667.2	3	119561289	119577806	+	ENSRNOG00000011778	Blvra
10	103975081	103975609	+	NONRATT006274.2	10	103967311	103972668	-	ENSRNOG00000003626	Atp5h
1	100505234	100506141	+	NONRATT000665.2	1	100495118	100501437	-	ENSRNOG00000019532	Emc10
9	16019155	16019495	+	NONRATT029174.2	9	16003057	16080152	+	ENSRNOG00000015813	Ubr2
14	114174573	114175579	-	NONRATT010208.2	14	114127024	114173670	+	ENSRNOG00000004621	Rtn4
1	135135832	135162693	+	ENSRNOT00000076363	1	135083973	135162685	+	ENSRNOG00000012369	Fam174b
2	84211619	84227396	-	NONRATT016210.2	2	84226247	84226407	-	ENSRNOG00000054199	U1
8	61834975	61836793	-	NONRATT028613.2	8	61833325	61836945	-	ENSRNOG00000018671	Commd4
1	37977364	38007302	-	NONRATT002084.2	1	37988254	37990007	-	ENSRNOG00000056694
4	145533943	145535593	+	NONRATT020791.2	4	145489868	145551479	+	ENSRNOG00000061085	Fancd2
4	157377783	157378438	+	NONRATT020893.2	4	157375183	157381105	-	ENSRNOG00000016143	Gpr162
8	52827626	52828927	-	NONRATT028519.2	8	52829084	52830609	+	ENSRNOG00000005918	RGD1563941
10	85798754	85800327	-	NONRATT005963.2	10	85799202	85825735	-	ENSRNOG00000036882	Fbxo47
12	29967215	30004674	-	NONRATT007906.2	12	29961119	29988959	-	ENSRNOG00000000895	Rabgef1
8	48577907	48578766	-	NONRATT028465.2	8	48571322	48577853	+	ENSRNOG00000039086	Ccdc153
3	113283925	113284301	-	NONRATT019625.2	3	113272849	113312127	-	ENSRNOG00000014436	Ppip5k1
9	27486587	27539217	-	NONRATT029860.2	9	27475272	27511176	-	ENSRNOG00000033402	LOC501110
13	84535623	84536255	+	NONRATT008428.2	13	84474361	84530031	+	ENSRNOG00000025151	Ildr2
1	135797070	135798102	-	NONRATT002766.2	1	135799749	136073540	-	ENSRNOG00000032798	Slco3a1
9	16002922	16011557	+	NONRATT029172.2	9	16003057	16080152	+	ENSRNOG00000015813	Ubr2
7	9747657	9826425	-	NONRATT026413.2	7	9747420	9834707	-	ENSRNOG00000051152	LOC102549817
9	65545205	65547806	-	NONRATT030056.2	9	65534703	65587251	+	ENSRNOG00000012473	Cflar
6	136003657	136005428	+	NONRATT025355.2	6	136004213	136011406	+	ENSRNOG00000010218	Eif5
8	48436975	48437309	-	NONRATT028461.2	8	48437917	48443240	+	ENSRNOG00000039107	Mfrp
1	87995114	87999224	-	NONRATT002490.2	1	87975996	88066101	-	ENSRNOG00000020557	Ryr1
1	277605290	277607339	-	NONRATT003942.2	1	277606994	277629196	-	ENSRNOG00000051680	Ccdc186
6	91878451	91879720	-	NONRATT025074.2	6	91885297	92007917	-	ENSRNOG00000004826	Sos2
6	28336482	28336861	+	NONRATT024114.2	6	28323646	28340577	+	ENSRNOG00000026649	Dnmt3a
14	81209166	81210198	-	NONRATT010027.2	14	81105138	81254637	-	ENSRNOG00000011073	Htt
11	3142756	3164730	+	NONRATT006395.2	11	3119884	3164751	+	ENSRNOG00000028774	Vgll3
5	61026316	61026763	-	NONRATT023214.2	5	60971256	61077627	-	ENSRNOG00000011503	Shb
1	207892135	207962863	+	NONRATT001304.2	1	207887208	207987136	+	ENSRNOG00000015717	Ptpre
2	196498417	196498916	-	NONRATT016662.2	2	196487683	196496986	+	ENSRNOG00000021138	Cers2
19	26206026	26207843	+	NONRATT014160.2	19	26196836	26216267	+	ENSRNOG00000023910	Man2b1
1	59146710	59147571	+	NONRATT000248.2	1	59156250	59214452	+	ENSRNOG00000012988	Lix1
7	144078496	144081906	+	NONRATT026343.2	7	144090327	144090509	+	ENSRNOG00000055213	uc_338
1	78818387	78818948	+	NONRATT000391.2	1	78800753	78812483	+	ENSRNOG00000052256	Dact3
1	141433589	141434546	-	NONRATT002797.2	1	141434624	141451075	-	ENSRNOG00000026857	Kif7
10	53485336	53485982	+	NONRATT004403.2	10	53466869	53481770	+	ENSRNOG00000037852	Pirt
14	69865444	69865781	+	NONRATT009410.2	14	69800155	69897384	+	ENSRNOG00000003787	Lcorl
10	92552590	92553824	-	NONRATT006139.2	10	92554080	92602082	-	ENSRNOG00000005904	Cdc27
15	8895383	8901941	+	NONRATT010278.2	15	8890577	9086282	-	ENSRNOG00000006649	Thrb
10	93815814	93816648	+	NONRATT004972.2	10	93811504	94127129	+	ENSRNOG00000052840	Tanc2
4	161679673	161685000	-	NONRATT021870.2	4	161680026	161681660	-	ENSRNOG00000028517	Rhno1
16	61795628	61796036	+	NONRATT011553.2	16	61795431	61814733	+	ENSRNOG00000013254	Dctn6
10	56193707	56195463	+	NONRATT004447.2	10	56187019	56198448	+	ENSRNOG00000010756	Tp53
2	154588073	154590662	+	NONRATT015326.2	2	154556028	154590643	+	ENSRNOG00000051151	Gmps
6	107633762	107635236	-	NONRATT024505.2	6	107636855	107678156	-	ENSRNOG00000010653	Elmsan1
18	30446634	30446889	+	NONRATT013374.2	18	30435118	30437458	+	ENSRNOG00000020073	Pcdhb8
18	63394712	63395210	-	NONRATT013900.2	18	63394899	63409600	+	ENSRNOG00000017729	Psmg2
6	93548235	93549488	+	NONRATT024361.2	6	93549483	93562314	-	ENSRNOG00000008222	Timm9
17	60892963	60895625	-	NONRATT013054.2	17	60888016	60946426	-	ENSRNOG00000018698	Wac
3	155309073	155312003	+	NONRATT019876.2	3	155297618	155356462	+	ENSRNOG00000015928	Dhx35
15	8890578	8891909	-	NONRATT010747.2	15	8890577	9086282	-	ENSRNOG00000006649	Thrb
13	49282391	49283121	-	NONRATT008690.2	13	49277721	49280151	+	ENSRNOG00000028752	Tmem81
9	65301198	65302259	-	NONRATT030047.2	9	65296777	65307995	-	ENSRNOG00000025768	Clk1
5	172328258	172329616	-	NONRATT023929.2	5	172328261	172335892	-	ENSRNOG00000013820	Tnfrsf14
4	115680083	115685478	+	NONRATT020633.2	4	115681827	115681956	+	ENSRNOG00000060457	SNORA5
18	55954048	55954549	-	NONRATT013837.2	18	55955388	55992885	-	ENSRNOG00000019014	Ndst1
12	39173043	39185147	-	NONRATT007984.2	12	39164289	39185168	-	ENSRNOG00000001331	Rnf34
2	120520397	120529940	-	NONRATT016329.2	2	120512898	120570355	-	ENSRNOG00000051480	Fxr1
4	113888109	113888791	+	NONRATT020603.2	4	113887114	113890101	+	ENSRNOG00000007842	Aup1
4	157399552	157400328	-	NONRATT021846.2	4	157383051	157408176	-	ENSRNOG00000016294	Cd4
3	3365653	3366552	+	NONRATT017901.2	3	3325769	3363459	+	ENSRNOG00000017283	Kcnt1
X	67653204	67653977	-	NONRATT031040.2	X	67656252	67829026	+	ENSRNOG00000005639	Ar
4	81818530	81819453	-	NONRATT021429.2	4	81818568	81968832	-	ENSRNOG00000012228	Skap2
10	59189373	59230871	+	NONRATT004527.2	10	59173267	59254453	+	ENSRNOG00000010041	Ube2g1
1	166042164	166056138	+	NONRATT001023.2	1	166031271	166037424	-	ENSRNOG00000019283	P2ry2
8	117438769	117446026	-	NONRATT028999.2	8	117455261	117476734	+	ENSRNOG00000020288	Slc25a20
12	30444170	30446075	+	NONRATT007434.2	12	30450309	30464373	+	ENSRNOG00000000920	Phkg1
9	46062711	46065449	+	NONRATT029334.2	9	45901740	46081880	+	ENSRNOG00000013408	Npas2
18	3573695	3574037	+	NONRATT013216.2	18	3565165	3590739	+	ENSRNOG00000023376	Riok3
16	6153684	6154500	-	NONRATT011729.2	16	6113167	6245644	-	ENSRNOG00000013147	Cacna1d
11	73936748	73937843	+	NONRATT006660.2	11	73936749	73963852	+	ENSRNOG00000001724	Atp13a3
9	95347734	95348418	-	NONRATT030261.2	9	95349085	95362014	-	ENSRNOG00000022911	Hjurp
6	137716769	137717482	-	NONRATT025381.2	6	137711154	137733026	-	ENSRNOG00000013927	Jag2
1	7219544	7252366	+	NONRATT000021.2	1	7252348	7259035	+	ENSRNOG00000025587	Plagl1
15	42878222	42878818	-	NONRATT010529.2	15	42827309	42947656	-	ENSRNOG00000027839	Ptk2b
13	44578318	44578944	+	NONRATT008171.2	13	44585885	44586016	+	ENSRNOG00000054237	SNORA36
2	257439509	257445096	+	NONRATT015872.2	2	257453346	257484587	-	ENSRNOG00000012512	Nexn
17	16373681	16381053	+	NONRATT012350.2	17	16386234	16386366	+	ENSRNOG00000055463	SNORA17
1	174335749	174338680	+	NONRATT001086.2	1	174338883	174350196	-	ENSRNOG00000013713	LOC499240
15	36944118	36944573	-	NONRATT010927.2	15	36939634	36942924	+	ENSRNOG00000051238	Mphosph8
14	10735604	10749021	-	NONRATT009745.2	14	10718843	10749120	-	ENSRNOG00000023650	Cops4
2	218975047	218975857	+	NONRATT015719.2	2	218951140	218971259	+	ENSRNOG00000014323	Extl2
1	46937016	46937989	-	NONRATT002127.2	1	46942191	46978261	-	ENSRNOG00000017889	Serac1
9	42939700	42943166	-	NONRATT029915.2	9	42899432	42943152	-	ENSRNOG00000015417	Kansl3
8	116371174	116373043	-	NONRATT028969.2	8	116354072	116361343	-	ENSRNOG00000016512	Sema3b
6	132958190	132958569	-	NONRATT025343.2	6	132936969	132958546	-	ENSRNOG00000004650	Begain
7	11810791	11824520	-	NONRATT026485.2	7	11786104	11824742	-	ENSRNOG00000032546	Dot1l
1	16882655	16882974	+	NONRATT000063.2	1	16819248	16895650	+	ENSRNOG00000014531	Hbs1l
4	115002455	115003637	+	NONRATT020620.2	4	115004447	115015965	-	ENSRNOG00000010833	Mthfd2
8	115135940	115136649	-	NONRATT028943.2	8	115141579	115149419	-	ENSRNOG00000011936	Abhd14a
18	28361286	28380933	+	NONRATT013324.2	18	28361282	28390696	+	ENSRNOG00000019875	Matr3
3	162851375	162867574	-	NONRATT019982.2	3	162791354	162872831	-	ENSRNOG00000006052	Sulf2
17	87779331	87780028	-	NONRATT013178.2	17	87725866	87826421	-	ENSRNOG00000008659	Arhgap21
3	164933779	164934473	-	NONRATT020001.2	3	164937197	164964702	-	ENSRNOG00000010975	Adnp
13	48763106	48763647	+	NONRATT008197.2	13	48745859	48766283	+	ENSRNOG00000007591	Slc45a3
12	47646585	47653658	-	NONRATT008073.2	12	47638273	47653638	-	ENSRNOG00000001191	Tchp
5	126746166	126746967	-	NONRATT023447.2	5	126746171	126782726	-	ENSRNOG00000009398	Tceanc2
18	76707964	76708756	-	NONRATT013590.2	18	76704219	76714486	-	ENSRNOG00000055647	Rbfa
3	112954872	112956921	+	NONRATT018511.2	3	112916216	112949728	+	ENSRNOG00000023874	Tmem62
18	17692551	17693071	+	NONRATT013268.2	18	17698037	17716880	-	ENSRNOG00000014503	Celf4
19	34179489	34180332	-	NONRATT014609.2	19	34139996	34402436	+	ENSRNOG00000013152	Arhgap10
10	102077189	102083016	-	NONRATT006239.2	10	101754829	102084035	-	ENSRNOG00000031213	Slc39a11
4	29083110	29092706	-	NONRATT021216.2	4	29082364	29092753	-	ENSRNOG00000011008	Bet1
3	6539098	6581345	+	NONRATT017935.2	3	6430200	6571377	+	ENSRNOG00000008749	Col5a1
7	142244964	142260372	-	NONRATT027326.2	7	142244294	142260896	-	ENSRNOG00000048932	Smagp
5	154103183	154103879	+	NONRATT022739.2	5	154103439	154103865	+	ENSRNOG00000054640	AC135901.1
3	2429359	2429906	-	NONRATT019022.2	3	2428296	2428401	+	ENSRNOG00000058281	U6
3	161260837	161261332	-	NONRATT019945.2	3	161259734	161272460	-	ENSRNOG00000015187	Acot8
2	140730273	140731122	-	NONRATT016378.2	2	140708396	140727281	+	ENSRNOG00000061857	Mgst2
9	116060923	116061395	-	NONRATT030377.2	9	116058609	116222440	-	ENSRNOG00000017065	Arhgap28
5	142844260	142845077	-	NONRATT023591.2	5	142845113	142850111	+	ENSRNOG00000025424	Yrdc
2	217017000	217024453	+	NONRATT015711.2	2	216863427	217056523	+	ENSRNOG00000023148	Col11a1
16	2107997	2108923	+	NONRATT011235.2	16	2113977	2227309	-	ENSRNOG00000011307	Slmap
2	251453929	251470016	+	NONRATT015852.2	2	251466862	251466969	-	ENSRNOG00000060828	U6
10	104692793	104695693	-	NONRATT005055.2	10	104682373	104689178	-	ENSRNOG00000008256	Mrpl38
11	67618710	67623924	+	NONRATT006617.2	11	67598418	67618704	-	ENSRNOG00000031653	Ccdc58
3	94062537	94064123	-	NONRATT019523.2	3	94064233	94182714	-	ENSRNOG00000011132	LOC100362814
6	138237173	138238948	-	NONRATT025392.2	6	138239269	138249382	-	ENSRNOG00000034190	Ighm
10	7068046	7077411	-	NONRATT005193.2	10	7077487	7080798	+	ENSRNOG00000027087	Tmem186
7	94379823	94380536	+	NONRATT025961.2	7	94375019	94383024	+	ENSRNOG00000008697	Nov
7	54767933	54778815	-	NONRATT026744.2	7	54756042	54767471	+	ENSRNOG00000004035	Krr1
10	14943520	14944210	+	NONRATT004105.2	10	14932347	14937336	-	ENSRNOG00000018841	Sox8
5	71800543	71822153	+	NONRATT022282.2	5	71742910	71823139	+	ENSRNOG00000032048	Zfp462
6	7909287	7910523	+	NONRATT024001.2	6	7900971	7933796	+	ENSRNOG00000005151	Dync2li1
10	56527633	56531392	-	NONRATT005601.2	10	56524467	56526987	+	ENSRNOG00000016360	Gps2
16	14090542	14093519	-	NONRATT011806.2	16	14095057	14210449	-	ENSRNOG00000022781	Ccser2
8	103338860	103339691	+	NONRATT027949.2	8	103342928	103351680	+	ENSRNOG00000033654	LOC501038
6	145577444	145584954	+	NONRATT024736.2	6	145546594	145625236	+	ENSRNOG00000005271	Rapgef5
19	56029558	56031500	+	NONRATT014378.2	19	56024902	56032605	+	ENSRNOG00000016088	Cdk10
1	259434850	259442073	-	NONRATT003756.2	1	259376932	259484569	-	ENSRNOG00000015658	Sorbs1
11	71593301	71594992	-	NONRATT007083.2	11	71593301	71601662	-	ENSRNOG00000001758	Tctex1d2
17	14053895	14054477	-	NONRATT012823.2	17	14053895	14058642	-	ENSRNOG00000014538	Nxnl2
2	186974238	186974844	-	NONRATT016539.2	2	186980991	187101571	+	ENSRNOG00000015026	Arhgef11
2	236343084	236344557	+	NONRATT015774.2	2	236353444	236395067	-	ENSRNOG00000010697	Hadh
16	7784731	7785479	+	NONRATT011298.2	16	7758995	7791243	+	ENSRNOG00000019656	Btd
10	90349240	90350811	+	NONRATT004934.2	10	90351899	90356242	-	ENSRNOG00000020994	Slc25a39
13	100313184	100314626	-	NONRATT009069.2	13	100300053	100405339	-	ENSRNOG00000031934	Enah
3	2745041	2745686	-	NONRATT019049.2	3	2746074	2770620	-	ENSRNOG00000006238	Traf2
3	161039970	161045320	+	NONRATT018874.2	3	161036702	161040511	-	ENSRNOG00000042526	Wfdc6a
10	96663869	96871963	+	NONRATT005007.2	10	96661695	96662166	+	ENSRNOG00000052124	AABR07030630.1
1	166915056	166920714	-	NONRATT002998.2	1	166915044	166919302	-	ENSRNOG00000019890	Folr2
1	278327180	278327691	+	NONRATT001902.2	1	278311243	278418336	+	ENSRNOG00000017321	Trub1
1	198196150	198197757	+	NONRATT001201.2	1	198192772	198198975	+	ENSRNOG00000053583	Mapk3
15	33192796	33193544	-	NONRATT010854.2	15	33198985	33199100	-	ENSRNOG00000055128	SNORA68
10	105649024	105649940	+	NONRATT005094.2	10	105650861	105668593	-	ENSRNOG00000012083	St6galnac2
19	38039768	38062297	+	NONRATT014226.2	19	38039728	38114003	+	ENSRNOG00000054264	Nfatc3
14	44057258	44057532	-	NONRATT009895.2	14	44038613	44078897	-	ENSRNOG00000027152	N4bp2
5	164318093	164320462	-	NONRATT023829.2	5	164316006	164348713	-	ENSRNOG00000054488	AABR07050417.1
8	127976577	127977638	+	NONRATT028148.2	8	127920348	128009951	-	ENSRNOG00000013136	Oxsr1
7	11351750	11352231	-	NONRATT026452.2	7	11356117	11380913	+	ENSRNOG00000020407	Atcay
4	153832499	153834373	+	NONRATT020872.2	4	153805992	153834430	+	ENSRNOG00000037198	Usp18
2	198704075	198704724	-	NONRATT016683.2	2	198702586	198706428	-	ENSRNOG00000021209	Polr3gl
14	86688972	86695048	-	NONRATT010011.2	14	86688688	86688857	+	ENSRNOG00000052548	SNORA73
10	64359851	64360464	+	NONRATT005701.2	10	64368808	64375816	-	ENSRNOG00000055236	Gemin4
7	97880372	97880934	+	NONRATT025972.2	7	97855635	97881955	+	ENSRNOG00000006251	Fam83a
7	119998638	119999071	-	NONRATT027103.2	7	120000020	120026755	-	ENSRNOG00000008401	Card10
3	12182045	12182696	-	NONRATT019203.2	3	12178852	12415073	-	ENSRNOG00000016910	LOC100365556
10	58782379	58784409	-	NONRATT005658.2	10	58780596	58784374	-	ENSRNOG00000014618	Med31
1	64181008	64181672	+	NONRATT000271.2	1	64172539	64175099	-	ENSRNOG00000060293	AC103574.4
2	2949098	2953399	+	NONRATT014871.2	2	2903491	3004553	+	ENSRNOG00000040297	Ttc37
14	114891244	114891998	-	NONRATT010215.2	14	114891245	115052450	-	ENSRNOG00000042419	Acyp2
1	87089319	87089719	-	NONRATT002472.2	1	87078019	87147308	-	ENSRNOG00000020433	Actn4
9	97975138	97975459	-	NONRATT030280.2	9	97927980	97989297	-	ENSRNOG00000019648	Col6a3
2	183213044	183275370	-	NONRATT016512.2	2	183149173	183213228	-	ENSRNOG00000010124	Trim2
10	11138274	11138827	+	NONRATT004015.2	10	11090313	11143683	+	ENSRNOG00000004146	Coro7
4	14112320	14112885	+	NONRATT020174.2	4	14071506	14109104	+	ENSRNOG00000043176	RGD1565355
6	132536154	132536465	+	NONRATT024611.2	6	132510756	132589928	+	ENSRNOG00000014476	Evl
2	144867877	144869627	+	NONRATT015295.2	2	144861444	144939389	+	ENSRNOG00000032922	Dclk1
1	278021294	278022666	-	NONRATT003948.2	1	277870367	278042312	-	ENSRNOG00000046333	Ablim1
12	48831811	48832310	+	NONRATT007632.2	12	48817319	48857724	-	ENSRNOG00000053045	Wscd2
1	264171816	264173058	-	NONRATT003820.2	1	264175838	264175957	+	ENSRNOG00000047325	5S_rRNA
10	62303722	62304540	+	NONRATT004560.2	10	62303661	62306888	+	ENSRNOG00000037275	Tlcd2
4	123638614	123641167	-	NONRATT021625.2	4	123642615	123713464	-	ENSRNOG00000009019	Slc6a6
10	38606714	38607094	-	NONRATT005421.2	10	38601623	38642397	-	ENSRNOG00000016596	Hspa4
14	79919716	79922403	-	NONRATT009999.2	14	79919716	79988110	-	ENSRNOG00000060665	Afap1
4	7264024	7264589	+	NONRATT020130.2	4	7258175	7260317	+	ENSRNOG00000013383	Tmub1
3	37440934	37442790	-	NONRATT019289.2	3	37434619	37445907	-	ENSRNOG00000004673	Rbm43
X	10407106	10413987	-	NONRATT030860.2	X	10402724	10413995	-	ENSRNOG00000023383	Ddx3x
6	105266256	105266852	-	NONRATT025169.2	6	105224165	105261549	-	ENSRNOG00000006399	Synj2bp
9	45020911	45021956	-	NONRATT029953.2	9	44839959	45292047	-	ENSRNOG00000018830	Aff3
1	274108311	274119924	+	NONRATT001865.2	1	274096572	274107100	-	ENSRNOG00000014833	Smndc1
6	38423906	38425374	-	NONRATT024913.2	6	38422887	38453797	-	ENSRNOG00000006652	Ddx1
9	29628664	29629544	-	NONRATT029872.2	9	29634178	29647903	-	ENSRNOG00000014142	Ogfrl1
11	31817675	31823761	+	NONRATT006447.2	11	31806617	31823761	+	ENSRNOG00000002021	Son
5	57125306	57168146	-	NONRATT023146.2	5	57121768	57168610	-	ENSRNOG00000059461	B4galt1
9	81877313	81880095	-	NONRATT030167.2	9	81844137	81868086	-	ENSRNOG00000022414	Zfp142
1	100895298	100896813	+	NONRATT000679.2	1	100892005	100896550	+	ENSRNOG00000053084	Fuz
2	257452938	257454195	-	NONRATT016950.2	2	257453346	257484587	-	ENSRNOG00000012512	Nexn
8	62307752	62308500	+	NONRATT027736.2	8	62317293	62322883	+	ENSRNOG00000054468	Fam219b
3	152942334	152943777	+	NONRATT019865.2	3	152933770	152943777	+	ENSRNOG00000020317	RGD1307752
2	93827563	93830820	+	NONRATT015155.2	2	93817888	93817994	+	ENSRNOG00000061847	U6
14	2597604	2612963	-	NONRATT009691.2	14	2509362	2610929	-	ENSRNOG00000024545	Ccdc18
15	34428081	34431217	-	NONRATT010906.2	15	34424015	34431325	-	ENSRNOG00000020264	Dhrs1
3	164932734	164933422	-	NONRATT020000.2	3	164937197	164964702	-	ENSRNOG00000010975	Adnp
19	37266812	37267494	-	NONRATT014621.2	19	37266782	37281933	-	ENSRNOG00000025231	Lrrc29
4	147839711	147840222	+	NONRATT020811.2	4	147832135	147837298	+	ENSRNOG00000011144	Rho
10	64379922	64387495	-	NONRATT004586.2	10	64375923	64376938	+	ENSRNOG00000007771	Dbil5
6	50775935	50782472	-	NONRATT024953.2	6	50772828	50786967	-	ENSRNOG00000007253	Cbll1
15	34539625	34541670	+	NONRATT010454.2	15	34548294	34550860	-	ENSRNOG00000020503	Cbln3
2	206223622	206224645	+	NONRATT015652.2	2	206219418	206222248	-	ENSRNOG00000019211	Olfml3
16	19792840	19793995	+	NONRATT011376.2	16	19781278	19791832	-	ENSRNOG00000023485	Ushbp1
16	83329431	83342629	-	NONRATT012155.2	16	83326300	83342667	-	ENSRNOG00000015021	Carkd
2	40582902	40592883	+	NONRATT015003.2	2	40554145	41464064	+	ENSRNOG00000042536	Pde4d
1	274573249	274587160	+	NONRATT001870.2	1	274391931	274589816	+	ENSRNOG00000014705	Rbm20
16	26906513	26907114	+	NONRATT011463.2	16	26906715	27014813	+	ENSRNOG00000043387	Cpe
10	59172416	59173751	-	NONRATT005662.2	10	59173267	59254453	+	ENSRNOG00000010041	Ube2g1
1	134758939	134760650	-	NONRATT002758.2	1	134760083	134867001	-	ENSRNOG00000012716	Chd2
12	9752735	9753235	+	NONRATT007262.2	12	9728485	9793428	+	ENSRNOG00000000955	Lnx2
7	12345145	12346475	-	NONRATT026506.2	7	12331415	12346475	-	ENSRNOG00000024549	Mum1
10	10766212	10767390	-	NONRATT005209.2	10	10766207	10767389	-	ENSRNOG00000042344	Smim22
1	245235677	245236805	-	NONRATT003679.2	1	245237735	245269205	+	ENSRNOG00000027491	Vldlr
11	11065374	11075920	-	NONRATT006800.2	11	11062789	11214141	-	ENSRNOG00000029598	Robo2
11	31161140	31181453	-	NONRATT006861.2	11	31104786	31180636	-	ENSRNOG00000002051	Synj1
2	23236572	23237419	-	NONRATT015972.2	2	23236574	23256158	-	ENSRNOG00000011200	Bhmt
13	82247230	82248405	+	NONRATT008405.2	13	82231029	82254318	+	ENSRNOG00000025318	Scyl3
2	206453538	206473945	+	NONRATT015656.2	2	206454207	206493030	+	ENSRNOG00000019785	Phtf1
1	191880914	191881759	+	NONRATT003117.2	1	191889327	191948975	-	ENSRNOG00000060008	Cog7
12	38879897	38880485	+	NONRATT007516.2	12	38880376	38894582	+	ENSRNOG00000042607	LOC687609
17	81818879	81819389	+	NONRATT012642.2	17	81798755	82017481	+	ENSRNOG00000018378	Cacnb2
7	12440508	12441962	-	NONRATT026520.2	7	12433932	12441048	+	ENSRNOG00000024349	Dos
7	107264234	107367929	-	NONRATT026982.2	7	107273418	107391184	-	ENSRNOG00000025460	Tmem71
17	60189711	60190195	+	NONRATT012559.2	17	60059948	60250352	+	ENSRNOG00000018760	Mpp7
1	167076033	167090799	-	NONRATT003000.2	1	167066515	167090296	+	ENSRNOG00000000417	Numa1
9	98204928	98268155	+	NONRATT029660.2	9	98190828	98257735	+	ENSRNOG00000019892	Lrrfip1
9	13492442	13493154	+	NONRATT029143.2	9	13446895	13490669	+	ENSRNOG00000053945	Daam2
2	30505872	30522675	-	NONRATT016034.2	2	30494824	30522727	-	ENSRNOG00000018230	Gtf2h2
10	12994267	12995674	+	NONRATT004052.2	10	13000089	13002862	+	ENSRNOG00000003648	Cldn6
10	94348383	94349845	-	NONRATT006156.2	10	94280702	94349368	+	ENSRNOG00000061424	Map3k3
1	78924790	78925483	+	NONRATT000399.2	1	78933371	78936700	+	ENSRNOG00000027936	Ccdc8
1	199048150	199048540	-	NONRATT003217.2	1	199037543	199052172	+	ENSRNOG00000018840	Rnf40
4	77556848	77567732	+	NONRATT020429.2	4	77554268	77580714	+	ENSRNOG00000026981	Zfp282
12	6712592	6740373	-	NONRATT007715.2	12	6711746	6740714	-	ENSRNOG00000000906	Medag
10	65168218	65171558	-	NONRATT004624.2	10	65176647	65200109	-	ENSRNOG00000024964	Nufip2
1	85437779	85438753	+	NONRATT000539.2	1	85438104	85466635	+	ENSRNOG00000032034	Supt5h
19	25812901	25813444	+	NONRATT014140.2	19	25821948	25914696	-	ENSRNOG00000002983	Nfix
12	46718559	46718946	+	NONRATT007604.2	12	46704274	46718355	-	ENSRNOG00000022014	Rab35
11	53515281	53528286	-	NONRATT006961.2	11	53518725	53575060	-	ENSRNOG00000001964	Cd47
2	7649765	7650343	-	NONRATT015935.2	2	7648624	7651673	-	ENSRNOG00000053036	AC123427.1
8	125555890	125563556	+	NONRATT028131.2	8	124840159	125645898	-	ENSRNOG00000025881	Rbms3
1	100896240	100896589	+	NONRATT000680.2	1	100892005	100896550	+	ENSRNOG00000053084	Fuz
10	29189407	29191033	+	ENSRNOT00000088987	10	29191685	29196252	-	ENSRNOG00000003902	Fabp6
1	208001785	208002130	-	NONRATT003293.2	1	207993894	208020454	-	ENSRNOG00000028137	Mki67
2	196470325	196480150	-	NONRATT016658.2	2	196487683	196496986	+	ENSRNOG00000021138	Cers2
X	153000955	153002621	+	NONRATT000882.2	X	152999015	153031444	+	ENSRNOG00000051704	Zfp185
1	247136727	247139120	+	NONRATT001653.2	1	247144490	247169693	-	ENSRNOG00000052506	Ak3
X	114127491	114128735	-	NONRATT031181.2	X	114131897	114232939	-	ENSRNOG00000022166	Ammecr1
4	150547348	150551047	-	NONRATT021770.2	4	150547466	150616895	-	ENSRNOG00000006717	Ankrd26
4	44358963	44360410	+	NONRATT020261.2	4	44321882	44360405	+	ENSRNOG00000051952	Tes
15	4025456	4026625	-	NONRATT010729.2	15	4031503	4035064	-	ENSRNOG00000009274	Fut11
13	51583381	51585009	-	NONRATT008731.2	13	51534024	51578052	+	ENSRNOG00000004756	Syt2
3	124515990	124529912	+	NONRATT018632.2	3	124515977	124531316	+	ENSRNOG00000021259	Prnp
9	119153919	119155128	+	NONRATT029742.2	9	118842786	119158196	+	ENSRNOG00000016196	Dlgap1
3	11812615	11813283	+	NONRATT018051.2	3	11813574	11820549	-	ENSRNOG00000039315	LOC499781
X	10771113	10771721	-	NONRATT030869.2	X	10771111	10772633	-	ENSRNOG00000023261	Ube2q2l
14	66762709	66771692	-	NONRATT009951.2	14	66749808	66771750	-	ENSRNOG00000004140	Pacrgl
X	29550867	29562140	-	NONRATT030943.2	X	29525255	29547294	+	ENSRNOG00000030443	Rab9a
3	176690571	176692268	+	NONRATT018974.2	3	176698304	176706896	-	ENSRNOG00000012987	Ptk6
10	7081409	7082212	+	NONRATT003996.2	10	7077487	7080798	+	ENSRNOG00000027087	Tmem186
20	6217147	6219753	+	NONRATT017166.2	20	6211419	6219893	+	ENSRNOG00000000517	Kctd20
7	2903326	2904716	+	NONRATT025469.2	7	2906136	2909179	-	ENSRNOG00000054140	LOC102551071
19	37664455	37665330	+	NONRATT014213.2	19	37652968	37668019	+	ENSRNOG00000024452	Rltpr
20	132978	158399	+	NONRATT017002.2	20	154657	157665	-	ENSRNOG00000050210	RT1-CE10
20	3818404	3820654	-	NONRATT017536.2	20	3812286	3813673	-	ENSRNOG00000000467	Ring1
18	70196740	70197870	+	NONRATT013562.2	18	70192492	70197867	+	ENSRNOG00000014614	Cxxc1
1	154424709	154457124	+	NONRATT000939.2	1	154377464	154457290	+	ENSRNOG00000018322	Picalm
6	28679556	28692303	-	NONRATT024890.2	6	28677564	28931843	-	ENSRNOG00000004068	Ncoa1
3	154845325	154848947	-	NONRATT018829.2	3	154849407	154849539	-	ENSRNOG00000058944	SNORA71
1	164571209	164573182	+	NONRATT000993.2	1	164502388	164593139	+	ENSRNOG00000030404	Arrb1
19	10109125	10113205	-	NONRATT014449.2	19	10119252	10123232	+	ENSRNOG00000013460	Zfp319
15	44793627	44794379	-	NONRATT010516.2	15	44799333	44804574	+	ENSRNOG00000013658	Nefl
4	140709242	140709947	+	NONRATT020765.2	4	140703618	140709319	+	ENSRNOG00000007152	Bhlhe40
9	94569286	94576678	-	NONRATT030252.2	9	94569285	94601852	-	ENSRNOG00000016653	LOC100912512
1	277540444	277574901	+	ENSRNOT00000083048	1	277537584	277538985	+	ENSRNOG00000017002	Adrb1
4	124776114	124776972	-	NONRATT020730.2	4	124660261	124858250	-	ENSRNOG00000023257	Adamts9
11	43987593	43992576	-	NONRATT006933.2	11	44001578	44003664	+	ENSRNOG00000039680	Gpr15
1	218627697	218628115	-	NONRATT003394.2	1	218569509	218629678	+	ENSRNOG00000014254	Cpt1a
10	13528400	13529290	-	NONRATT005246.2	10	13537032	13542077	-	ENSRNOG00000006542	Atp6v0c
6	133770722	133773340	+	NONRATT024640.2	6	133770705	133770779	+	ENSRNOG00000059106	SNORD113
15	37709860	37714823	+	NONRATT010478.2	15	37710847	37711222	-	ENSRNOG00000057750	AABR07018058.1
2	236458275	236460686	-	NONRATT016879.2	2	236458278	236480502	-	ENSRNOG00000011284	Sgms2
8	22625106	22625618	-	NONRATT028332.2	8	22625873	22628843	+	ENSRNOG00000009255	RGD1309188
14	83566320	83571591	+	NONRATT009516.2	14	83573930	83603003	-	ENSRNOG00000019000	Limk2
10	20611528	20615258	+	NONRATT004165.2	10	20591431	20615258	+	ENSRNOG00000007419	LOC100362038
1	216698269	216700632	+	NONRATT001383.2	1	216677372	216700641	+	ENSRNOG00000020562	Slc22a18
17	70593468	70598425	+	NONRATT012593.2	17	70586393	70603267	+	ENSRNOG00000018767	Rbm17
4	100100246	100108833	+	NONRATT020556.2	4	100067340	100099517	-	ENSRNOG00000010716	Atoh8
6	111642168	111650500	+	NONRATT024535.2	6	111642410	111740481	+	ENSRNOG00000012685	Adck1
10	90251879	90253151	-	NONRATT006079.2	10	90250274	90265017	-	ENSRNOG00000020937	Ubtf
X	152928860	152932819	-	NONRATT002870.2	X	152927717	152932953	-	ENSRNOG00000059593	Cetn2
1	197784145	197800777	-	NONRATT003155.2	1	197785967	197801634	-	ENSRNOG00000057384	Nfatc2ip
1	79986073	79987996	+	NONRATT000418.2	1	79982638	79987562	+	ENSRNOG00000014984	Dmwd
17	23066100	23069062	-	NONRATT012880.2	17	22984843	23178516	+	ENSRNOG00000014548	Nedd9
15	57391931	57392217	+	NONRATT010594.2	15	57340578	57405287	+	ENSRNOG00000011237	Zc3h13
15	108912681	108913708	+	NONRATT010707.2	15	108908606	108912737	+	ENSRNOG00000054879	Zic2
20	46744966	46745254	+	NONRATT017446.2	20	46667120	46758305	+	ENSRNOG00000000302	Sesn1
13	85373680	85376493	-	NONRATT009029.2	13	85376715	85443976	-	ENSRNOG00000003917	Uck2
9	27569031	27630418	-	NONRATT029863.2	9	27562958	27761733	-	ENSRNOG00000013781	Kcnq5
3	116899345	116943406	+	NONRATT018543.2	3	116899877	116956169	+	ENSRNOG00000004812	Sema6d
10	17045485	17045956	-	NONRATT005336.2	10	17048250	17075139	-	ENSRNOG00000027606	Neurl1b
15	54904220	54940071	-	NONRATT032155.1	15	54905273	54906203	-	ENSRNOG00000015042	Cysltr2
8	78858678	78879199	+	NONRATT028733.2	8	78872101	78949447	+	ENSRNOG00000055631	Zfp280d
14	19028816	19034031	-	NONRATT009794.2	14	19028809	19072677	-	ENSRNOG00000039504	LOC360919
1	222480244	222495192	-	NONRATT003528.2	1	222483600	222485193	-	ENSRNOG00000048337	AC126148.1
17	4306834	4307230	-	NONRATT012730.2	17	4297223	4454778	-	ENSRNOG00000018198	Dapk1
10	94960898	94961791	+	NONRATT004994.2	10	94963632	94963909	+	ENSRNOG00000059899	7SK
18	3372109	3372596	+	NONRATT013214.2	18	3317723	3421721	+	ENSRNOG00000012795	Cables1
1	48879687	48905124	-	NONRATT000185.2	1	48880110	48891130	-	ENSRNOG00000054620	AC135026.1
X	159170676	159172528	+	NONRATT030828.2	X	159165168	159172518	+	ENSRNOG00000000875	Fhl1
5	5685323	5686096	+	NONRATT022034.2	5	5689525	5691794	-	ENSRNOG00000059973	AABR07046763.1
6	944478	945042	+	NONRATT023967.2	6	788547	960703	+	ENSRNOG00000004208	Crim1
14	78230467	78234672	+	NONRATT009443.2	14	78213634	78253266	+	ENSRNOG00000007564	Evc
8	80202738	80203991	-	NONRATT027830.2	8	80203608	80631926	-	ENSRNOG00000056612	Unc13c
20	48309509	48310004	-	NONRATT017832.2	20	48299963	48310175	-	ENSRNOG00000000320	Timm10b
10	104142070	104142859	-	NONRATT005070.2	10	104138988	104155717	-	ENSRNOG00000027057	Gga3
5	92036136	92037988	-	NONRATT023331.2	5	92038049	92039146	-	ENSRNOG00000023946	Tmem261
3	162482458	162484091	-	NONRATT019970.2	3	162481839	162579201	-	ENSRNOG00000019154	Zmynd8
19	39045892	39081282	-	NONRATT014654.2	19	39077579	39087880	-	ENSRNOG00000047246	Chtf8
8	95963542	95963918	-	NONRATT028852.2	8	95968651	96012696	+	ENSRNOG00000011071	Nt5e
17	48648918	48649343	-	NONRATT012978.2	17	48648878	48810991	-	ENSRNOG00000012940	Vps41
X	21696853	21697589	+	NONRATT030925.2	X	21699367	21710678	-	ENSRNOG00000003081	Ribc1
15	38070421	38071881	+	NONRATT010482.2	15	38077908	38096875	-	ENSRNOG00000021847	Ska3
18	73563708	73564158	+	NONRATT013601.2	18	73563615	73564245	-	ENSRNOG00000045604	AC139391.1
11	25456749	25457380	-	NONRATT006831.2	11	25410974	25456836	-	ENSRNOG00000057794	Adamts5
3	117593558	117598095	-	NONRATT019644.2	3	117569696	117766120	-	ENSRNOG00000007302	Fbn1
9	71911814	71912403	+	NONRATT030099.2	9	71915420	72005838	+	ENSRNOG00000015158	Pikfyve
19	38249488	38250256	-	NONRATT014647.2	19	38237964	38321528	-	ENSRNOG00000000257	Smpd3
4	81236819	81240458	-	NONRATT021427.2	4	81237495	81241152	-	ENSRNOG00000011175	Hnrnpa2b1
3	147765485	147766610	+	NONRATT018735.2	3	147772164	147789158	+	ENSRNOG00000005766	Tbc1d20
2	38134976	38139919	+	NONRATT014988.2	2	38147600	38208719	-	ENSRNOG00000014000	Kif2a
5	61690749	61691356	-	NONRATT023219.2	5	61657506	61712051	+	ENSRNOG00000009761	Tmod1
15	27757563	27758667	-	NONRATT010823.2	15	27739250	27749648	+	ENSRNOG00000008892	Parp2
1	59705128	59713291	+	NONRATT000252.2	1	59704997	59715763	+	ENSRNOG00000039076	LOC688452
17	6667588	6670943	+	NONRATT012225.2	17	6658387	6660536	-	ENSRNOG00000019108	Rmi1
4	342316	344629	+	NONRATT020089.2	4	342301	350515	+	ENSRNOG00000006859	Insig1
18	69629402	69634129	-	NONRATT013916.2	18	69627756	69671199	-	ENSRNOG00000051965	Smad4
2	147853423	148009588	+	NONRATT015305.2	2	147955366	147959567	-	ENSRNOG00000017427	Pfn2
4	116713070	116713732	-	NONRATT021553.2	4	116579033	116786391	-	ENSRNOG00000059615	Exoc6b
13	94937051	94948239	+	NONRATT008489.2	13	94888276	95013016	+	ENSRNOG00000004181	Sdccag8
3	176585894	176587303	-	NONRATT020048.2	3	176589905	176644951	-	ENSRNOG00000011624	Kcnq2
1	190672621	190674851	+	NONRATT001152.2	1	190671695	190672043	+	ENSRNOG00000055297	AABR07005633.1
12	41593950	41595127	+	ENSRNOT00000086158	12	41600004	41619186	+	ENSRNOG00000001385	Plbd2
1	277628990	277637653	-	NONRATT003945.2	1	277641511	277685257	+	ENSRNOG00000017064	Tdrd1
2	207287693	207288338	-	NONRATT016744.2	2	207271942	207278004	+	ENSRNOG00000012630	Rhoc
5	73575089	73578308	-	NONRATT023245.2	5	73561449	73621070	-	ENSRNOG00000010593	Ctnnal1
13	72861090	72862392	-	NONRATT008834.2	13	72865718	72893187	-	ENSRNOG00000000040	RGD1304622
12	47470037	47470724	+	NONRATT007613.2	12	47469597	47482961	-	ENSRNOG00000028814	Oasl2
9	82422669	82436102	-	NONRATT030181.2	9	82411012	82414240	+	ENSRNOG00000019294	Stk16
10	52744062	52745189	-	NONRATT005547.2	10	52749845	53037816	-	ENSRNOG00000029012	Shisa6
10	57619677	57620511	-	NONRATT005635.2	10	57613878	57618527	-	ENSRNOG00000006949	C1qbp
X	25059808	25060066	+	NONRATT030483.2	X	25016400	25080410	+	ENSRNOG00000003533	Clcn4
14	37107310	37107890	-	NONRATT009853.2	14	37116491	37128737	+	ENSRNOG00000002135	Sgcb
12	12432319	12440203	-	NONRATT007761.2	12	12409875	12546111	-	ENSRNOG00000025155	Lmtk2
12	37466931	37468863	-	NONRATT007944.2	12	37453004	37468935	-	ENSRNOG00000001043	Ddx55
5	60534026	60538375	+	NONRATT022234.2	5	60528980	60538399	+	ENSRNOG00000012794	Grhpr
11	27056091	27058587	-	NONRATT006833.2	11	27022985	27080701	-	ENSRNOG00000001602	Ltn1
18	36194138	36196279	-	NONRATT013793.2	18	36194777	36285444	-	ENSRNOG00000054049	Prelid2
3	107347927	107348822	+	NONRATT018461.2	3	107142761	107348650	+	ENSRNOG00000004571	RGD1563680
10	37606169	37608855	+	NONRATT004249.2	10	37600887	37601023	-	ENSRNOG00000058244	SNORA42
2	46982129	46988441	+	NONRATT015043.2	2	46980975	46992883	+	ENSRNOG00000056325	Mocs2
3	136888040	136936649	-	NONRATT019732.2	3	136657813	136936650	-	ENSRNOG00000004951	Kif16b
15	34357760	34359326	-	NONRATT010896.2	15	34352913	34362032	+	ENSRNOG00000020216	Gmpr2
17	16270637	16274626	+	NONRATT012347.2	17	16204426	16274622	+	ENSRNOG00000016816	Phf2
14	45149184	45149523	-	NONRATT009908.2	14	45142768	45165207	-	ENSRNOG00000002163	Klf3
1	213750211	213750835	-	NONRATT003337.2	1	213737787	213742637	+	ENSRNOG00000014783	Athl1
4	34063491	34065156	-	NONRATT021234.2	4	34048532	34194764	-	ENSRNOG00000033618	Col28a1
8	119159855	119162080	+	NONRATT028095.2	8	119160730	119174830	+	ENSRNOG00000033921	Als2cl
6	49874907	49904799	+	NONRATT024192.2	6	49852129	49895510	+	ENSRNOG00000005522	Sh3yl1
1	267360105	267360555	+	NONRATT001839.2	1	267359829	267412810	+	ENSRNOG00000011339	Slk
10	36848387	36849960	-	NONRATT005408.2	10	36741433	37028367	+	ENSRNOG00000003349	Col23a1
17	69835338	69847164	-	NONRATT013088.2	17	69806064	69827112	-	ENSRNOG00000017672	Akr1c14
16	8796299	8797307	+	NONRATT011323.2	16	8734034	8803182	+	ENSRNOG00000030017	Ercc6
10	46953841	46954573	+	NONRATT004363.2	10	46940964	46954674	+	ENSRNOG00000003948	Llgl1
10	61755041	61756125	+	NONRATT004553.2	10	61746105	61756639	+	ENSRNOG00000002980	Tsr1
6	80283094	80285494	+	NONRATT024312.2	6	80220546	80286546	+	ENSRNOG00000005101	Ctage5
8	22780735	22782280	-	NONRATT028335.2	8	22780724	22785671	-	ENSRNOG00000029862	Spc24
3	3592407	3594017	-	NONRATT019073.2	3	3590782	3594475	-	ENSRNOG00000042501	RGD1564379
1	72882807	72883525	+	NONRATT002294.2	1	72889269	72899629	+	ENSRNOG00000028041	Tnnt1
1	169445402	169446580	+	NONRATT001062.2	1	169446804	169463760	-	ENSRNOG00000017191	Trim5
12	9216797	9222172	-	NONRATT007728.2	12	9216535	9331195	-	ENSRNOG00000000942	Pan3
13	68865081	68865814	+	NONRATT008305.2	13	68831370	68858809	-	ENSRNOG00000002454	Rnf2
8	127575287	127576715	+	NONRATT028143.2	8	127271288	127572988	+	ENSRNOG00000043167	Itga9
6	73119801	73134289	+	NONRATT024273.2	6	72891724	73148536	+	ENSRNOG00000027444	Nubpl
1	82554982	82555536	-	NONRATT002420.2	1	82512744	82546937	-	ENSRNOG00000020683	Hnrnpul1
16	49465965	49468934	-	NONRATT011986.2	16	49462888	49465888	+	ENSRNOG00000031335	Ankrd37
13	50197474	50197973	+	NONRATT008213.2	13	50196041	50234862	+	ENSRNOG00000053210	Zc3h11a
20	27552564	27577449	+	NONRATT017363.2	20	27535323	27552349	-	ENSRNOG00000042916	Rwdd1
19	41947481	41957534	-	NONRATT014693.2	19	41941076	41960083	-	ENSRNOG00000000262	Zfp821
5	169491477	169491964	-	NONRATT023910.2	5	169486256	169499268	-	ENSRNOG00000033722	Rnf207
4	181504541	181505885	+	NONRATT021055.2	4	181481146	181502916	+	ENSRNOG00000001844	Klhl42
4	180961233	180984423	+	NONRATT021045.2	4	180913705	180951564	-	ENSRNOG00000001817	Tm7sf3
8	58983766	58984021	-	NONRATT028582.2	8	58932579	59077690	-	ENSRNOG00000009170	Dmxl2
3	167959360	167959772	-	NONRATT020013.2	3	167958275	168018410	-	ENSRNOG00000012906	Bcas1
9	82345901	82348730	+	NONRATT029522.2	9	82345718	82351567	+	ENSRNOG00000018586	Fam134a
2	123274271	123275369	-	NONRATT016343.2	2	123275882	123281856	-	ENSRNOG00000015423	Ccna2
8	71192834	71193286	+	NONRATT027809.2	8	71167304	71200289	+	ENSRNOG00000015896	Rbpms2
3	150053154	150053624	+	NONRATT018783.2	3	150052482	150053670	+	ENSRNOG00000016583	RGD1561517
4	82809727	82832035	+	NONRATT020473.2	4	82836259	83137527	-	ENSRNOG00000027026	Jazf1
7	140744201	140744828	+	NONRATT030714.2	7	140742417	140746197	+	ENSRNOG00000052880	Prph
6	75831959	75839806	-	NONRATT025015.2	6	75793959	75874235	-	ENSRNOG00000006828	Baz1a
11	1831241	1832225	-	NONRATT006784.2	11	1835184	1836897	-	ENSRNOG00000029956	Zfp654
16	20845206	20845636	+	NONRATT011420.2	16	20845584	20860789	-	ENSRNOG00000020142	Gdf1
1	17697898	17698388	-	NONRATT001992.2	1	17446416	18058055	-	ENSRNOG00000047605	Ptprk
8	67376538	67376903	+	NONRATT027777.2	8	67376293	67492037	-	ENSRNOG00000015257	Coro2b
5	159213512	159214106	+	NONRATT022804.2	5	159220978	159234320	+	ENSRNOG00000006327	Rcc2
1	22757011	22758012	-	ENSRNOT00000089045	1	22705915	22748422	-	ENSRNOG00000016371	Slc18b1
3	80650586	80650962	+	NONRATT018366.2	3	80634469	80830068	+	ENSRNOG00000017422	Ambra1
19	57643034	57643427	-	NONRATT014830.2	19	57650162	57654703	+	ENSRNOG00000021330	Sprtn
14	42070281	42070851	+	NONRATT009346.2	14	42015346	42206311	+	ENSRNOG00000034200	Atp8a1
4	115484677	115487350	-	NONRATT021551.2	4	115487312	115516296	-	ENSRNOG00000014092	Paip2b
16	19432476	19433155	+	NONRATT011357.2	16	19410809	19528934	+	ENSRNOG00000015751	Cyp4f18
9	119590412	119590707	-	NONRATT030389.2	9	119594628	119653255	-	ENSRNOG00000014837	Emilin2
11	88732286	88756566	+	NONRATT006767.2	11	88699221	88796677	+	ENSRNOG00000059491	Fgd4
6	109464913	109465518	+	NONRATT024514.2	6	109466059	109505161	+	ENSRNOG00000008224	Jdp2
3	119173866	119174360	+	NONRATT018563.2	3	119173817	119222484	+	ENSRNOG00000010729	Usp8
5	93068721	93069203	-	NONRATT023337.2	5	92862266	93244202	-	ENSRNOG00000005711	Ptprd
7	12436786	12437188	+	NONRATT025577.2	7	12433932	12441048	+	ENSRNOG00000024349	Dos
5	38844525	38850520	+	NONRATT022152.2	5	38844487	38961035	+	ENSRNOG00000006996	Mms22l
19	46775279	46776140	+	NONRATT014304.2	19	46761569	46771478	+	ENSRNOG00000012030	Wwox
9	100554567	100560452	-	NONRATT030307.2	9	100554562	100588951	-	ENSRNOG00000031479	Hdlbp
9	27067240	27068820	-	NONRATT029855.2	9	27068442	27107709	+	ENSRNOG00000042729	Efhc1
1	37978031	37979240	-	NONRATT002085.2	1	37988254	37990007	-	ENSRNOG00000056694
5	39618963	39620242	-	NONRATT023111.2	5	39615955	39650895	-	ENSRNOG00000007831	Ufl1
9	97927383	97928377	-	NONRATT030278.2	9	97927980	97989297	-	ENSRNOG00000019648	Col6a3
5	86387239	86400150	-	NONRATT023320.2	5	86387239	86554102	-	ENSRNOG00000005788	Cdk5rap2
8	68569529	68571914	-	NONRATT028679.2	8	68569529	68678349	-	ENSRNOG00000008620	Smad3
1	225206383	225207092	+	NONRATT001523.2	1	225195801	225214010	+	ENSRNOG00000057569	Ahnak
2	40962785	40970607	-	NONRATT016094.2	2	40554145	41464064	+	ENSRNOG00000042536	Pde4d
6	80083264	80083620	-	NONRATT025046.2	6	80062702	80102635	-	ENSRNOG00000004657	Sec23a
4	157239142	157240493	-	NONRATT021836.2	4	157230768	157235367	+	ENSRNOG00000012999	Phb2
13	35858096	35858476	-	NONRATT008653.2	13	35678239	35858390	-	ENSRNOG00000002625	Ptpn4
18	27404145	27406102	-	NONRATT013733.2	18	27398687	27424090	-	ENSRNOG00000020340	Brd8
1	187773238	187774086	+	NONRATT001134.2	1	187759900	187765744	-	ENSRNOG00000018320	Rps15a
X	127804568	127804836	+	NONRATT030786.2	X	127562659	127829753	+	ENSRNOG00000007682	Gria3
12	38873768	38879161	+	ENSRNOT00000090171	12	38845620	38869346	-	ENSRNOG00000001337	Setd1b
4	65992766	66002391	-	NONRATT021342.2	4	65990563	66002444	-	ENSRNOG00000013944	Zc3hav1l
14	16372869	16377736	-	NONRATT009776.2	14	16341535	16364326	+	ENSRNOG00000002125	Ccni
X	84766915	84821762	-	NONRATT031119.2	X	84666899	84821775	-	ENSRNOG00000000161	Chm
5	144175829	144176629	-	NONRATT023598.2	5	144179022	144221263	-	ENSRNOG00000009977	Thrap3
7	59926760	59928066	-	NONRATT026762.2	7	59928425	59957232	-	ENSRNOG00000005362	Rab3ip
19	19899687	19904185	-	NONRATT014520.2	19	19895838	19896224	+	ENSRNOG00000046982	AABR07043085.1
12	38284306	38287441	+	NONRATT007493.2	12	38274348	38294292	+	ENSRNOG00000001238	Rsrc2
1	42476664	42486038	-	NONRATT002106.2	1	42477398	42477468	+	ENSRNOG00000055161	snoU2-30
10	89338532	89339250	-	NONRATT006050.2	10	89331700	89338739	-	ENSRNOG00000050347
10	11720238	11721037	+	NONRATT004028.2	10	11724031	11757681	+	ENSRNOG00000005418	Trap1
15	25358945	25361623	+	NONRATT010352.2	15	25294424	25361623	+	ENSRNOG00000013353	Tmem260
5	159281183	159286941	+	NONRATT022805.2	5	159260674	159293673	-	ENSRNOG00000006855	Padi4
15	33158882	33159295	-	NONRATT010851.2	15	33156491	33165895	-	ENSRNOG00000012046	Prmt5
1	247944263	247944799	-	NONRATT003704.2	1	247900135	247978540	-	ENSRNOG00000026942	RGD1311595
1	141871668	141872301	+	NONRATT000839.2	1	141866282	141893705	-	ENSRNOG00000013949	Idh2
2	243156832	243158911	+	NONRATT015813.2	2	243160916	243173048	+	ENSRNOG00000010552	Lamtor3
7	59545807	59617254	-	NONRATT026757.2	7	59527123	59587382	-	ENSRNOG00000004909	Cnot2
8	60172130	60386912	-	NONRATT028593.2	8	60334596	60359440	-	ENSRNOG00000027847	Nxpe2
1	41888798	41889355	-	NONRATT002101.2	1	41832829	42077535	-	ENSRNOG00000018960	Syne1
1	221273365	221281187	-	NONRATT003478.2	1	221272352	221281180	-	ENSRNOG00000020904	Cdc42ep2
3	138765074	138766354	+	NONRATT018672.2	3	138715569	138757111	+	ENSRNOG00000008411	Sec23b
10	88791855	88796598	-	NONRATT006032.2	10	88790407	88842233	-	ENSRNOG00000019742	Stat3
16	54117484	54137461	-	NONRATT012011.2	16	54040846	54137660	-	ENSRNOG00000010155	Pcm1
4	99753566	99769297	+	NONRATT020549.2	4	99738791	99746560	-	ENSRNOG00000008546	Mrpl35
5	74248995	74249709	-	NONRATT023254.2	5	74250452	74368186	-	ENSRNOG00000011425	Ptpn3
8	84434783	84461537	-	NONRATT028795.2	8	84434783	84522588	-	ENSRNOG00000005934	Mlip
4	117222858	117223581	+	NONRATT020644.2	4	117230527	117234928	-	ENSRNOG00000050483	Pradc1
13	35789359	35858104	-	NONRATT008652.2	13	35678239	35858390	-	ENSRNOG00000002625	Ptpn4
1	65595518	65597417	-	NONRATT002246.2	1	65597102	65597899	-	ENSRNOG00000019623	LOC102552463
19	56024913	56031500	+	NONRATT014377.2	19	56024902	56032605	+	ENSRNOG00000016088	Cdk10
15	4888417	4889541	+	NONRATT010258.2	15	4894212	4951917	-	ENSRNOG00000000341	Nid2
14	14386406	14387078	-	NONRATT009768.2	14	14364007	14390699	-	ENSRNOG00000002045	Anxa3
8	119381255	119381632	-	NONRATT029033.2	8	119382010	119483043	+	ENSRNOG00000021047	Lrrfip2
8	62327894	62328304	-	NONRATT028627.2	8	62317293	62322883	+	ENSRNOG00000054468	Fam219b
7	114452728	114453475	-	NONRATT027002.2	7	114440948	114590119	-	ENSRNOG00000007916	Ptk2
6	143901279	143910080	+	NONRATT024723.2	6	143901279	143917575	+	ENSRNOG00000004268	Zfp386
1	142500590	142511760	+	ENSRNOT00000089908	1	142393206	142500383	-	ENSRNOG00000011975	Crtc3
9	85546061	85546539	+	NONRATT029561.2	9	85542701	85548144	+	ENSRNOG00000015231	Mrpl44
12	37966757	37984665	-	NONRATT007952.2	12	37923527	37958363	+	ENSRNOG00000001082	Abcb9
7	31852648	31858782	-	NONRATT026672.2	7	31847409	31872423	-	ENSRNOG00000008797	Tmpo
5	153829227	153843663	-	NONRATT023723.2	5	153807954	153840178	-	ENSRNOG00000037165	Nipal3
10	63721055	63721876	+	NONRATT005718.2	10	63731766	63772049	+	ENSRNOG00000003846	Pitpna
2	264838858	264841121	-	NONRATT016996.2	2	264837471	264864265	-	ENSRNOG00000029592	Srsf11
4	28519024	28520904	+	NONRATT020212.2	4	28441300	28551784	+	ENSRNOG00000009894	Ccdc132
7	63014717	63044476	-	NONRATT026784.2	7	62996335	63045728	-	ENSRNOG00000024027	Lemd3
16	19560216	19573590	+	NONRATT011360.2	16	19581811	19583386	-	ENSRNOG00000060701	Zfp617
2	60311299	60313984	+	NONRATT016192.2	2	60131775	60308152	+	ENSRNOG00000057557	Prlr
8	59764504	59768423	+	NONRATT027710.2	8	59769993	59786065	+	ENSRNOG00000022702	Fbxo22
2	211708622	211709726	-	NONRATT016795.2	2	211706227	211715311	-	ENSRNOG00000020438	Prpf38b
10	54239524	54240812	+	NONRATT004418.2	10	54155875	54235268	+	ENSRNOG00000049361	Gas7
1	99565875	99566186	+	NONRATT000642.2	1	99561522	99575684	+	ENSRNOG00000022701	Ceacam18
3	91275495	91276571	+	NONRATT018388.2	3	91252828	91271607	+	ENSRNOG00000004639	Traf6
14	7696010	7697597	-	NONRATT009727.2	14	7685713	7686018	-	ENSRNOG00000061065	7SK
9	81582473	81583238	-	NONRATT030159.2	9	81574172	81575900	-	ENSRNOG00000014797	Tmbim1
4	168159650	168168315	+	NONRATT020970.2	4	168142270	168183096	+	ENSRNOG00000028632	Bcl2l14
3	61426716	61427242	-	NONRATT019390.2	3	61433862	61494778	-	ENSRNOG00000001593	Lnp
9	100438353	100440323	+	NONRATT029680.2	9	100440485	100445158	-	ENSRNOG00000037376	Mterfd2
8	115141579	115146498	-	NONRATT028944.2	8	115155469	115165706	+	ENSRNOG00000012406	Pcbp4
10	110181639	110182369	+	NONRATT005153.2	10	110148599	110182291	-	ENSRNOG00000036676	Csnk1d
2	186324580	186325330	-	NONRATT016534.2	2	186330297	186333805	-	ENSRNOG00000016451	Cd1d1
16	4468080	4468580	+	NONRATT011258.2	16	4469467	4489860	+	ENSRNOG00000015618	Wnt5a
2	220441116	220441454	+	NONRATT015734.2	2	220432036	220468859	+	ENSRNOG00000016351	Frrs1
10	89081366	89082596	-	NONRATT006043.2	10	89089645	89103614	+	ENSRNOG00000020277	Cntnap1
3	161474569	161478113	-	NONRATT019954.2	3	161465742	161498951	-	ENSRNOG00000017824	Ncoa5
7	123302191	123303492	+	NONRATT026159.2	7	123296182	123304066	+	ENSRNOG00000030150	LOC100362109
20	5350911	5351605	+	NONRATT017134.2	20	5351620	5418013	+	ENSRNOG00000038999	RT1-A1
12	37022011	37022378	+	NONRATT007466.2	12	36872019	37032904	+	ENSRNOG00000001004	Ncor2
7	124413773	124423647	-	NONRATT027187.2	7	124412761	124423832	-	ENSRNOG00000010539	Mcat
7	66017082	66056905	-	NONRATT026808.2	7	66017085	66172360	-	ENSRNOG00000004180	Fam19a2
9	117048370	117048861	-	NONRATT030378.2	9	117044532	117050371	+	ENSRNOG00000049880	Tmem200c
8	70462627	70463353	+	NONRATT027797.2	8	70447039	70471137	+	ENSRNOG00000012469	Vwa9
4	180059042	180130300	+	NONRATT021037.2	4	180123904	180135966	+	ENSRNOG00000015986	Rassf8
18	70762051	70762399	+	NONRATT013576.2	18	70739491	70762134	+	ENSRNOG00000013766	Acaa2
20	11468871	11473752	+	NONRATT017269.2	20	11478089	11478186	+	ENSRNOG00000057911	snoZ6
4	55505287	55506061	-	NONRATT021281.2	4	55503943	55527156	-	ENSRNOG00000007662	Zfp800
5	135865441	135867815	+	NONRATT022542.2	5	135860674	135868495	+	ENSRNOG00000018363	Hectd3
12	24477389	24478094	+	NONRATT007400.2	12	24473980	24476295	+	ENSRNOG00000001452	Fzd9
4	57771002	57773808	+	NONRATT020324.2	4	57715945	57773823	+	ENSRNOG00000010267	Klhdc10
2	210060538	210063297	-	NONRATT016757.2	2	210045160	210068502	+	ENSRNOG00000018131	Slc16a4
7	59556901	59587385	-	NONRATT026758.2	7	59527123	59587382	-	ENSRNOG00000004909	Cnot2
5	107841688	107844601	+	NONRATT022381.2	5	107823373	107841175	-	ENSRNOG00000059837	Cdkn2a
9	16612663	16618390	+	NONRATT029189.2	9	16610351	16611899	-	ENSRNOG00000017144	Mea1
16	54510009	54510577	-	NONRATT012016.2	16	54460066	54513349	-	ENSRNOG00000011016	Slc7a2
12	22234479	22235201	+	NONRATT007373.2	12	22236164	22245100	-	ENSRNOG00000001410	Gigyf1
15	34551644	34553109	+	NONRATT010455.2	15	34552409	34561727	+	ENSRNOG00000020506	Khnyn
5	59155630	59156747	-	NONRATT023200.2	5	59156070	59165160	-	ENSRNOG00000025453	Fam221b
1	226588138	226596131	+	NONRATT001549.2	1	226573104	226596131	+	ENSRNOG00000020668	Cpsf7
1	219600060	219603197	-	NONRATT003431.2	1	219566155	219640294	-	ENSRNOG00000019145	Kdm2a
4	95939416	95941095	+	NONRATT020526.2	4	95884742	95945248	+	ENSRNOG00000006391	Smarcad1
11	30642692	30643071	+	NONRATT006430.2	11	30550140	30663465	+	ENSRNOG00000002092	Hunk
6	105263124	105263997	-	NONRATT025167.2	6	105224165	105261549	-	ENSRNOG00000006399	Synj2bp
19	10145609	10150698	+	NONRATT014020.2	19	10142495	10159487	+	ENSRNOG00000031773	Cngb1
15	25890092	25900231	-	NONRATT010813.2	15	25887069	25933268	-	ENSRNOG00000013804	Exoc5
14	108197592	108203195	+	NONRATT009604.2	14	108143868	108264706	+	ENSRNOG00000051889	Usp34
10	64979904	64994920	-	NONRATT004626.2	10	64979769	65080535	-	ENSRNOG00000033101	Myo18a
6	28391622	28393181	-	NONRATT024889.2	6	28382961	28388967	+	ENSRNOG00000012686	Pomc
5	173048129	173050226	+	NONRATT022923.2	5	173052062	173078046	+	ENSRNOG00000017213	Cdk11b
12	38784466	38794372	-	NONRATT007971.2	12	38709594	38782010	-	ENSRNOG00000001342	Wdr66
20	3248357	3248940	+	NONRATT017036.2	20	3242469	3249189	+	ENSRNOG00000000787	RT1-T24-2
4	71621782	71622751	+	NONRATT020410.2	4	71621728	71626107	+	ENSRNOG00000016484	Gstk1
10	15305253	15305725	-	NONRATT005303.2	10	15308827	15311189	-	ENSRNOG00000020212	LOC302999
3	152273529	152335754	+	NONRATT019874.2	3	152294655	152377170	+	ENSRNOG00000019948	Phf20
18	79406421	79427308	+	NONRATT013622.2	18	79326737	79407285	+	ENSRNOG00000016516	Mbp
7	59941166	59941677	-	NONRATT026765.2	7	59928425	59957232	-	ENSRNOG00000005362	Rab3ip
1	81124697	81126797	-	NONRATT002376.2	1	81122789	81144024	-	ENSRNOG00000019416	Zfp94
12	36872946	36925717	+	NONRATT007464.2	12	36872019	37032904	+	ENSRNOG00000001004	Ncor2
4	49031848	49032475	+	NONRATT020276.2	4	49017310	49042990	+	ENSRNOG00000005496	Ing3
14	84022541	84022773	-	NONRATT010090.2	14	83943976	84106997	-	ENSRNOG00000019645	Osbp2
12	18527774	18531791	-	NONRATT007813.2	12	18531989	18534836	+	ENSRNOG00000028166	Asmtl
17	57322893	57332851	-	NONRATT013012.2	17	57304932	57394985	-	ENSRNOG00000014834	Epc1
3	61652334	61653581	+	NONRATT018269.2	3	61658244	61670282	+	ENSRNOG00000001577	Hoxd3
5	160233599	160234563	-	NONRATT023802.2	5	160236951	160282810	-	ENSRNOG00000012274	Ddi2
1	6970613	6970999	+	NONRATT000019.2	1	6453548	6970040	-	ENSRNOG00000011058	Utrn
12	24091392	24092076	-	NONRATT007873.2	12	24092003	24102084	-	ENSRNOG00000001443	Rhbdd2
20	7219443	7220293	-	NONRATT017622.2	20	7215773	7219548	-	ENSRNOG00000000490	Rps10
13	51814569	51814910	-	NONRATT008737.2	13	51815214	51930972	-	ENSRNOG00000005093	Lgr6
15	36839672	36845490	+	NONRATT010460.2	15	36809360	36862816	+	ENSRNOG00000051196	Parp4
1	20912220	20913305	-	NONRATT002001.2	1	20893994	20962526	-	ENSRNOG00000012346	Epb41l2
17	15853896	15854190	+	NONRATT012333.2	17	15845930	15858771	+	ENSRNOG00000016560	RGD1306058
1	199846550	199847535	-	NONRATT003246.2	1	199844858	199865548	-	ENSRNOG00000020271	Tial1
10	3840446	3841682	-	NONRATT005175.2	10	3840621	4249739	-	ENSRNOG00000002294	Snx29
6	93445629	93446736	-	NONRATT025090.2	6	93437382	93441873	+	ENSRNOG00000007851	Psma3
4	97760127	97763537	+	NONRATT020532.2	4	97657670	97760102	+	ENSRNOG00000050231	Gng12
11	46242178	46301812	-	NONRATT006945.2	11	46299736	46369577	-	ENSRNOG00000001627	Abi3bp
1	199358692	199359275	+	NONRATT001244.2	1	199352343	199356881	+	ENSRNOG00000019485	Bckdk
10	56492300	56492965	-	NONRATT005597.2	10	56489551	56491715	-	ENSRNOG00000015669	Kctd11
6	10910704	10911454	-	NONRATT024808.2	6	10912382	11014278	+	ENSRNOG00000014879	Ttc7a
2	143892934	143906198	+	NONRATT016384.2	2	143892566	143925633	+	ENSRNOG00000059480	Supt20
15	11832610	11833911	-	NONRATT010755.2	15	11836285	11912806	-	ENSRNOG00000005957	Slc4a7
10	78009332	78168609	-	NONRATT005870.2	10	78173846	78219793	-	ENSRNOG00000002474	Tom1l1
2	27936442	27937859	-	NONRATT015998.2	2	27942548	27949066	-	ENSRNOG00000016530	Nsa2
16	36374726	36391165	+	NONRATT011487.2	16	36371488	36373546	-	ENSRNOG00000060448	Hand2
10	105651734	105655058	-	NONRATT006296.2	10	105650861	105668593	-	ENSRNOG00000012083	St6galnac2
4	34740520	34779792	-	NONRATT021240.2	4	34635508	34779776	-	ENSRNOG00000008628	Ica1
1	142713916	142720187	-	NONRATT002825.2	1	142711788	142720257	-	ENSRNOG00000010664	Wdr73
6	26587006	26588259	+	NONRATT024078.2	6	26560600	26584535	+	ENSRNOG00000056904	Gtf3c2
11	80969269	80969891	-	NONRATT006676.2	11	80927611	80981422	-	ENSRNOG00000001823	St6gal1
10	105564509	105565224	+	NONRATT005089.2	10	105568090	105572403	+	ENSRNOG00000011182	Aanat
7	11849730	11856916	+	NONRATT025548.2	7	11838638	11873984	+	ENSRNOG00000018977	Ap3d1
4	77279275	77280247	+	NONRATT020424.2	4	77211691	77280169	+	ENSRNOG00000005310	Cul1
14	115352795	115429670	+	NONRATT009666.2	14	115391608	115446152	+	ENSRNOG00000032471	Asb3
3	172374956	172375612	+	NONRATT018953.2	3	172374956	172428483	+	ENSRNOG00000025889	Gnas
13	51784281	51784634	-	NONRATT008735.2	13	51584298	51784639	-	ENSRNOG00000051440	Ppp1r12b
18	69834187	69848981	+	NONRATT013556.2	18	69841124	69849389	+	ENSRNOG00000024426	Mro
10	18920912	18921650	+	NONRATT004155.2	10	18906009	18919261	+	ENSRNOG00000005465	Kcnmb1
17	9523793	9524523	-	NONRATT012775.2	17	9523794	9534653	-	ENSRNOG00000021911	Camlg
2	250600875	250633910	+	NONRATT015835.2	2	250600822	250633897	+	ENSRNOG00000055257	2021-09-15
8	79596531	79597636	+	NONRATT028721.2	8	79606788	79627166	+	ENSRNOG00000051813	Pygo1
10	40842505	40843440	+	NONRATT004288.2	10	40812857	40846252	+	ENSRNOG00000013186	G3bp1
8	22971558	22973313	-	NONRATT028341.2	8	22980907	23000485	-	ENSRNOG00000013027	Rgl3
6	7394804	7416311	-	ENSRNOT00000084160	6	7417424	7421456	-	ENSRNOG00000005067	LOC100911319
1	266022870	266023537	+	NONRATT001796.2	1	265904686	266033107	+	ENSRNOG00000026048	Gbf1
5	122455230	122477397	+	NONRATT022435.2	5	122390521	122491203	+	ENSRNOG00000006357	Sgip1
2	197887691	197888488	-	NONRATT016668.2	2	197861114	197878142	-	ENSRNOG00000057194	Tars2
8	70557169	70566394	+	NONRATT027800.2	8	70522091	70573424	+	ENSRNOG00000019105	Dpp8
18	51845372	52048282	-	NONRATT013827.2	18	52031841	52047816	-	ENSRNOG00000013738	LOC100174910
12	12338897	12339530	+	NONRATT007274.2	12	12322246	12330929	-	ENSRNOG00000001009	Bri3
7	54767827	54778800	-	NONRATT026743.2	7	54756042	54767471	+	ENSRNOG00000004035	Krr1
1	237902414	237909994	-	NONRATT003636.2	1	237893965	237910012	-	ENSRNOG00000017469	Anxa1
19	24830683	24831079	+	NONRATT014113.2	19	24803523	24831500	-	ENSRNOG00000004131	Pkn1
17	55230297	55231561	-	NONRATT012992.2	17	55230846	55300998	-	ENSRNOG00000018110	Svil
7	117710407	117712213	-	NONRATT027070.2	7	117720076	117722391	-	ENSRNOG00000014811	Cyhr1
X	71155278	71155851	+	NONRATT030577.2	X	71155600	71160837	+	ENSRNOG00000033316	Foxo4
17	10154541	10155345	-	NONRATT012792.2	17	10153993	10208360	-	ENSRNOG00000059840	Unc5a
10	110536352	110536773	+	NONRATT005161.2	10	110525748	110555629	-	ENSRNOG00000036662	Wdr45b
9	45101985	45102276	-	NONRATT029954.2	9	44839959	45292047	-	ENSRNOG00000018830	Aff3
16	81658046	81659743	-	NONRATT012136.2	16	81665539	81688148	+	ENSRNOG00000019504	Adprhl1
3	79713640	79715959	+	NONRATT018347.2	3	79713566	79718025	+	ENSRNOG00000009140	C1qtnf4
16	71784842	71786805	+	NONRATT011603.2	16	71738717	71787787	+	ENSRNOG00000038365	Plekha2
19	54060211	54060955	-	NONRATT014779.2	19	54060621	54148970	+	ENSRNOG00000017489	Gse1
13	70179519	70182885	+	NONRATT008314.2	13	70174969	70183874	+	ENSRNOG00000028062	Arpc5
7	137806906	137809111	-	NONRATT027284.2	7	137804018	137856485	-	ENSRNOG00000005263	LOC688906
2	206221256	206222166	-	NONRATT016732.2	2	206219418	206222248	-	ENSRNOG00000019211	Olfml3
4	179486096	179512484	-	NONRATT021973.2	4	179491128	179512471	-	ENSRNOG00000009338	Kras
10	74537121	74568629	+	NONRATT005853.2	10	74548269	74679858	-	ENSRNOG00000024730	Ppm1e
17	15673650	15680741	-	NONRATT012837.2	17	15673649	15718035	-	ENSRNOG00000016031	Bicd2
6	95343309	95344009	+	NONRATT024388.2	6	95323578	95360127	+	ENSRNOG00000005568	Pcnxl4
8	13351736	13352500	+	NONRATT027433.2	8	13305151	13352489	+	ENSRNOG00000009506	Mre11a
12	28253247	28254189	+	NONRATT007427.2	12	28212332	28251816	+	ENSRNOG00000000885	Auts2
2	40371476	40373224	-	NONRATT016093.2	2	40373210	40386669	-	ENSRNOG00000010450	Elovl7
1	87009817	87013607	+	NONRATT000562.2	1	87009729	87016005	+	ENSRNOG00000020308	Ech1
1	126147671	126153300	-	NONRATT002743.2	1	126146488	126211439	-	ENSRNOG00000011077	Tjp1
1	32105523	32106696	-	NONRATT002045.2	1	32086754	32140137	-	ENSRNOG00000016372	Slc12a7
10	110515614	110516507	+	NONRATT005160.2	10	110525748	110555629	-	ENSRNOG00000036662	Wdr45b
2	196330845	196338392	+	NONRATT015552.2	2	196309789	196323881	-	ENSRNOG00000021100	Tnfaip8l2
13	105137573	105138070	-	NONRATT009102.2	13	105042273	105140473	-	ENSRNOG00000002418	Tgfb2
6	86785787	86812078	+	NONRATT024332.2	6	86785770	86810316	+	ENSRNOG00000004521	Prpf39
1	282542105	282553554	+	NONRATT001916.2	1	282557425	282557923	+	ENSRNOG00000051496	AABR07007134.1
6	91885297	91888235	-	NONRATT025076.2	6	91885297	92007917	-	ENSRNOG00000004826	Sos2
7	31818448	31824012	-	NONRATT026666.2	7	31816601	31824064	-	ENSRNOG00000008289	Slc25a3
10	56507688	56509802	-	NONRATT005599.2	10	56507121	56507244	-	ENSRNOG00000061400	U2
1	85196686	85197349	+	NONRATT000534.2	1	85192173	85201757	+	ENSRNOG00000019883	Pak4
12	2172196	2173257	+	NONRATT007218.2	12	2164011	2164278	+	ENSRNOG00000058751	7SK
20	44602775	44606610	-	ENSRNOT00000076566	20	44580631	44596045	+	ENSRNOG00000000596	Fyn
1	53027720	53028432	-	NONRATT002168.2	1	53026607	53038229	-	ENSRNOG00000012415	Mpc1
15	2685504	2686639	-	NONRATT010720.2	15	2685510	2731462	-	ENSRNOG00000013236	Samd8
3	171026992	171027688	+	NONRATT018943.2	3	171015616	171030384	+	ENSRNOG00000021295	Rae1
15	61551863	61552353	-	NONRATT011117.2	15	61551860	61564695	-	ENSRNOG00000042960	Rgcc
3	94349782	94351148	-	NONRATT019525.2	3	94353093	94419048	-	ENSRNOG00000011358	Hipk3
1	146732211	146758974	-	NONRATT002855.2	1	146713675	146736261	-	ENSRNOG00000013223	Fah
7	12335231	12336601	-	NONRATT026504.2	7	12331415	12346475	-	ENSRNOG00000024549	Mum1
8	23492465	23524832	+	ENSRNOT00000087743	8	23450110	23482939	-	ENSRNOG00000029456	Rp9
7	11684579	11685117	-	NONRATT026472.2	7	11678590	11699436	-	ENSRNOG00000032429	Tmprss9
10	29320193	29321479	+	NONRATT004179.2	10	29289202	29334478	+	ENSRNOG00000003936	Pwwp2a
9	81562712	81563947	-	NONRATT030156.2	9	81566073	81634534	+	ENSRNOG00000014806	Pnkd
18	17677066	17677665	+	NONRATT013267.2	18	17403406	17676049	+	ENSRNOG00000029466	RGD1562608
10	84714698	84718730	-	ENSRNOT00000081040	10	84718823	84731880	+	ENSRNOG00000009225	Copz2
1	280422867	280425193	+	NONRATT001908.2	1	280423078	280457148	+	ENSRNOG00000008890	Slc18a2
11	71012029	71013064	-	NONRATT007066.2	11	70967438	71007619	+	ENSRNOG00000026420	Iqcg
19	34203031	34203697	-	NONRATT014610.2	19	34204197	34204802	-	ENSRNOG00000027022	AABR07043654.1
14	17621404	17631613	+	NONRATT009260.2	14	17606000	17616170	-	ENSRNOG00000058724	AC136013.2
7	3234811	3240947	+	NONRATT025474.2	7	3224832	3229167	-	ENSRNOG00000006827	Tmem198b
1	221200982	221204272	-	NONRATT003473.2	1	221213307	221233921	-	ENSRNOG00000020881	Frmd8
1	197905324	197905722	+	NONRATT001196.2	1	197903581	197907189	+	ENSRNOG00000018604	Tufm
2	29059738	29061626	-	NONRATT016014.2	2	29056218	29121104	-	ENSRNOG00000014999	Tnpo1
10	13750103	13750449	+	NONRATT004070.2	10	13736312	13779963	+	ENSRNOG00000050057	Abca3
6	26680627	26682605	-	NONRATT024858.2	6	26680597	26685235	-	ENSRNOG00000006326	Atraid
10	35793117	35793514	-	NONRATT005393.2	10	35800941	35833861	-	ENSRNOG00000003343	Canx
7	139253769	139254390	+	NONRATT026281.2	7	139232250	139254149	-	ENSRNOG00000059961	Rapgef3
16	20067003	20068543	-	NONRATT011853.2	16	20056764	20097287	-	ENSRNOG00000018452	Unc13a
11	54404815	54441619	+	NONRATT006569.2	11	54377373	54404612	-	ENSRNOG00000039183	RGD1310335
9	61610790	61613117	-	NONRATT030023.2	9	61594619	61634510	-	ENSRNOG00000013516	Sf3b1
1	228727069	228729054	+	NONRATT001568.2	1	228733181	228753422	-	ENSRNOG00000021086	Dtx4
8	13878394	13898265	+	NONRATT027447.2	8	13870769	13870891	+	ENSRNOG00000051521	SNORA32
16	21114943	21115695	-	NONRATT011893.2	16	21100923	21131795	-	ENSRNOG00000052111	Sugp1
17	27518164	27519729	+	NONRATT012401.2	17	27496352	27510918	+	ENSRNOG00000014165	Ssr1
9	65023221	65028802	+	NONRATT029403.2	9	65013861	65099433	+	ENSRNOG00000014555	Aox4
11	70103139	70113049	-	NONRATT007046.2	11	70056501	70172164	-	ENSRNOG00000001795	Itgb5
7	18684377	18696562	+	NONRATT025638.2	7	18682070	18683440	-	ENSRNOG00000042886	Rps28
3	164976211	164986370	-	NONRATT020003.2	3	164986420	164988369	+	ENSRNOG00000025067	Mocs3
20	5439670	5440846	-	NONRATT017584.2	20	5442389	5445509	+	ENSRNOG00000028505	Rps18
19	25586625	25587241	+	NONRATT014128.2	19	25526750	25749550	+	ENSRNOG00000052707	Cacna1a
7	116923099	116923714	-	NONRATT027031.2	7	116928264	116936674	-	ENSRNOG00000021638	Eef1d
X	32291316	32292052	+	NONRATT030502.2	X	32232141	32292072	+	ENSRNOG00000029330	Car5b
19	25957647	25959755	-	NONRATT014573.2	19	25969254	25978776	+	ENSRNOG00000003149	Farsa
3	107761738	107762406	-	NONRATT019583.2	3	107560196	107760589	-	ENSRNOG00000004730	Meis2
14	15253247	15258192	-	NONRATT009773.2	14	15253124	15258207	-	ENSRNOG00000024899	Cxcl13
6	28168870	28177236	+	NONRATT024108.2	6	27975416	28175458	+	ENSRNOG00000011914	Dtnb
4	7223969	7224679	-	NONRATT021104.2	4	7202329	7228675	-	ENSRNOG00000012764	Agap3
7	70457533	70458117	+	NONRATT025868.2	7	70459531	70467453	-	ENSRNOG00000029465	Slc26a10
3	121828973	121829665	-	NONRATT018585.2	3	121796237	121822436	-	ENSRNOG00000026143	Ckap2l
18	31792502	31808720	+	NONRATT032379.1	18	31816154	32207801	-	ENSRNOG00000013920	Arhgap26
4	118237479	118238253	+	NONRATT020662.2	4	118243131	118271768	+	ENSRNOG00000017380	RGD1306746
2	34223396	34224208	-	NONRATT016068.2	2	34223351	34254968	-	ENSRNOG00000012124	Trappc13
11	87441581	87441994	+	NONRATT006753.2	11	87446381	87449940	-	ENSRNOG00000001874	Slc7a4
13	96160139	96161168	+	NONRATT008497.2	13	96111799	96154685	+	ENSRNOG00000004524	Desi2
9	17962785	17963118	+	NONRATT029240.2	9	17949763	17988509	+	ENSRNOG00000019975	Cdc5l
14	104617438	104618365	+	NONRATT009593.2	14	104581189	104612597	-	ENSRNOG00000005248	Slc1a4
X	98033353	98033832	+	NONRATT030646.2	X	98033340	98033452	+	ENSRNOG00000060982	SNORA44
7	11309481	11311096	+	NONRATT025523.2	7	11295891	11315615	+	ENSRNOG00000020501	Tjp3
13	96238455	96239931	+	NONRATT008503.2	13	96225911	96238572	-	ENSRNOG00000033790	Hnrnpu
6	108327371	108329464	-	NONRATT024493.2	6	108315034	108329464	-	ENSRNOG00000011964	Abcd4
16	61795590	61802880	+	NONRATT011552.2	16	61795431	61814733	+	ENSRNOG00000013254	Dctn6
1	167283470	167285873	-	NONRATT003008.2	1	167246108	167308827	-	ENSRNOG00000020347	Nup98
5	103260805	103292509	+	NONRATT022359.2	5	103251985	103366264	+	ENSRNOG00000043151	Cntln
14	12027378	12028509	+	NONRATT009236.2	14	11988670	12027381	+	ENSRNOG00000002345	Rasgef1b
8	62366377	62368216	+	NONRATT027740.2	8	62341612	62368214	+	ENSRNOG00000019136	Scamp2
14	104290839	104292828	+	NONRATT009586.2	14	104250616	104290456	+	ENSRNOG00000004888	Spred2
12	14168373	14168898	-	NONRATT007775.2	12	14169138	14175945	-	ENSRNOG00000001107	Ap5z1
1	162331929	162334704	+	NONRATT000968.2	1	162320729	162325013	+	ENSRNOG00000024793	Kctd21
X	123406343	123407643	+	NONRATT030768.2	X	123404569	123407637	+	ENSRNOG00000039980	Slc25a5
4	81235167	81236469	-	NONRATT021420.2	4	81237495	81241152	-	ENSRNOG00000011175	Hnrnpa2b1
10	43487477	43489060	+	NONRATT004309.2	10	43446525	43498066	+	ENSRNOG00000031544	Larp1
20	5945212	5945715	+	NONRATT017157.2	20	5933468	5995195	+	ENSRNOG00000000513	Mapk14
10	56600143	56600966	+	NONRATT004467.2	10	56591291	56600232	+	ENSRNOG00000017352	Ctdnep1
9	18637915	18638522	+	NONRATT029243.2	9	18564926	18773092	+	ENSRNOG00000020193	Runx2
18	27699623	27700147	-	NONRATT013742.2	18	27698694	27725694	-	ENSRNOG00000019450	Etf1
5	173251527	173252311	+	NONRATT022933.2	5	173248244	173252775	+	ENSRNOG00000018647	Mrpl20
3	37665424	37666208	-	NONRATT019291.2	3	37658693	37803112	-	ENSRNOG00000006783	Neb
19	26169251	26170434	+	NONRATT014157.2	19	26151899	26171808	+	ENSRNOG00000003970	Tnpo2
5	75604072	75677041	-	NONRATT023273.2	5	75557041	75676584	-	ENSRNOG00000013656	Lpar1
7	31650060	31651586	+	NONRATT025722.2	7	30699475	31681182	+	ENSRNOG00000024870	Anks1b
7	98776882	98786630	-	NONRATT026967.2	7	98782177	98804499	-	ENSRNOG00000047198	Tatdn1
8	12813610	12821927	-	ENSRNOT00000085478	8	12823154	12872705	+	ENSRNOG00000008173	Sesn3
3	35801414	35811188	+	NONRATT018133.2	3	35783622	35801614	-	ENSRNOG00000004740	Mmadhc
3	112361148	112364200	+	NONRATT018501.2	3	112365937	112385528	-	ENSRNOG00000009143	Lrrc57
12	52009204	52009473	+	NONRATT007654.2	12	51960261	52054108	+	ENSRNOG00000037483	Ep400
14	83880927	83882200	-	NONRATT010085.2	14	83889088	83930522	+	ENSRNOG00000019624	Morc2
7	121841611	121847496	+	NONRATT026129.2	7	121841854	121864679	+	ENSRNOG00000018316	Grap2
10	105626787	105627624	+	NONRATT005090.2	10	105618325	105628091	-	ENSRNOG00000011541	Cygb
17	83612303	83613803	+	NONRATT012651.2	17	83221826	83610272	+	ENSRNOG00000000142	Plxdc2
11	14306256	14346849	+	ENSRNOT00000087049	11	14254046	14304603	-	ENSRNOG00000030930	Samsn1
17	8506228	8506921	-	NONRATT012760.2	17	8508173	8520147	-	ENSRNOG00000012168	Fbxl3-ps1
16	20646444	20647465	-	NONRATT011866.2	16	20639393	20640720	-	ENSRNOG00000058038	AABR07024877.1
1	21666223	21669779	+	NONRATT000088.2	1	21613147	21684480	+	ENSRNOG00000013791	Enpp3
6	77230981	77231786	-	NONRATT025031.2	6	77226438	77243677	-	ENSRNOG00000008610	Mbip
5	78302979	78303227	-	NONRATT023298.2	5	78305525	78324278	-	ENSRNOG00000014869	Wdr31
1	48105630	48106347	-	NONRATT000194.2	1	48077032	48108216	+	ENSRNOG00000014971	Mas1
11	34598377	34638656	+	NONRATT006481.2	11	34598491	34738791	+	ENSRNOG00000001682	Ttc3
10	62690122	62691951	+	NONRATT004573.2	10	62674560	62690834	+	ENSRNOG00000014742	Ankrd13b
3	177194317	177195171	+	NONRATT018994.2	3	177188043	177195894	+	ENSRNOG00000016288	Tcea2
1	87779396	87787912	-	NONRATT002482.2	1	87775991	87777668	-	ENSRNOG00000048116	LOC100366140
1	197815423	197816636	-	NONRATT003156.2	1	197813962	197814283	+	ENSRNOG00000031947	LOC100361060
8	81931729	81933458	+	NONRATT027872.2	8	81863618	81941536	+	ENSRNOG00000058522	Fam214a
4	89238417	89239176	-	NONRATT021458.2	4	89247299	89252822	+	ENSRNOG00000049140	AABR07060678.1
5	61604245	61604501	+	NONRATT022243.2	5	61564863	61631710	+	ENSRNOG00000055779	Tdrd7
8	128824494	128854547	+	NONRATT028170.2	8	128829679	128842739	+	ENSRNOG00000018700	Mobp
8	36702476	36706051	+	NONRATT027563.2	8	36714807	36720810	-	ENSRNOG00000055680	AC132671.1
8	103770833	103772070	+	NONRATT027954.2	8	103673410	103770947	+	ENSRNOG00000010027	Atr
5	12141173	12156896	-	NONRATT023010.2	5	12132656	12172009	-	ENSRNOG00000005730	Pcmtd1
3	118122856	118125840	-	NONRATT019652.2	3	118109405	118137191	-	ENSRNOG00000008744	Cops2
18	3930972	3937735	+	NONRATT013223.2	18	3861538	3940823	+	ENSRNOG00000011300	Lama3
10	57622718	57623096	-	NONRATT005637.2	10	57613878	57618527	-	ENSRNOG00000006949	C1qbp
1	22255195	22281767	-	NONRATT002008.2	1	22242717	22269831	-	ENSRNOG00000015670	Stx7
5	147495920	147496640	+	NONRATT022657.2	5	147499881	147535240	-	ENSRNOG00000021492	Rbbp4
1	225205202	225205691	+	NONRATT001521.2	1	225195801	225214010	+	ENSRNOG00000057569	Ahnak
6	133774615	133783122	+	NONRATT024641.2	6	133770705	133770779	+	ENSRNOG00000059106	SNORD113
9	65585326	65587251	+	NONRATT029417.2	9	65534703	65587251	+	ENSRNOG00000012473	Cflar
2	211206261	211206484	-	NONRATT016784.2	2	211183310	211207465	-	ENSRNOG00000020058	Celsr2
4	21862924	21863275	+	NONRATT020184.2	4	21862312	21902762	+	ENSRNOG00000005908	Dmtf1
19	19899538	19913553	-	NONRATT014518.2	19	19895838	19896224	+	ENSRNOG00000046982	AABR07043085.1
1	141875106	141875630	+	NONRATT000840.2	1	141866282	141893705	-	ENSRNOG00000013949	Idh2
19	33010743	33080755	-	NONRATT014606.2	19	33083411	33084915	+	ENSRNOG00000012138	Rbmxl1
6	51468459	51488104	-	NONRATT024965.2	6	51465907	51498337	-	ENSRNOG00000009385	Pik3cg
19	55953568	55954582	-	NONRATT014802.2	19	55929663	55946250	+	ENSRNOG00000015397	Cpne7
5	144436679	144470575	+	NONRATT022626.2	5	144448791	144479306	-	ENSRNOG00000055915	Ago1
15	83457402	83460593	+	NONRATT010640.2	15	83442143	83463717	+	ENSRNOG00000024798	Bora
6	92136234	92136940	-	NONRATT025081.2	6	92136991	92229260	-	ENSRNOG00000004923	Map4k5
9	54248631	54254993	+	NONRATT029377.2	9	54212766	54284872	+	ENSRNOG00000056246	Gls
7	14165517	14165887	-	NONRATT026558.2	7	14170545	14170818	+	ENSRNOG00000060598	Gm9978
5	147321120	147323089	+	NONRATT022654.2	5	147323239	147330266	+	ENSRNOG00000030238	Fndc5
12	12412814	12413362	-	NONRATT007759.2	12	12403384	12407561	-	ENSRNOG00000025164	Bhlha15
5	153679411	153688496	-	NONRATT023712.2	5	153675623	153708114	-	ENSRNOG00000018194	Srrm1
7	99784785	99785443	+	NONRATT025978.2	7	99757729	99808612	-	ENSRNOG00000061264	AABR07058091.2
15	47257973	47273029	-	NONRATT011018.2	15	47211582	47270317	+	ENSRNOG00000012012	Pinx1
16	49273811	49274629	+	NONRATT011514.2	16	49266902	49270698	+	ENSRNOG00000010830	Slc25a4
3	163951389	163952062	+	NONRATT018898.2	3	163950776	163986059	-	ENSRNOG00000008245	Ptgis
1	16866415	16869140	+	NONRATT000061.2	1	16819248	16895650	+	ENSRNOG00000014531	Hbs1l
2	30610768	30611831	-	NONRATT016037.2	2	30612746	30634243	-	ENSRNOG00000052167	Marveld2
3	113977183	113989424	+	NONRATT018530.2	3	113976686	113998922	+	ENSRNOG00000016459	Eif3j
2	211078317	211078606	+	NONRATT015697.2	2	211050359	211073714	+	ENSRNOG00000019868	Psma5
7	3234880	3240975	+	NONRATT025475.2	7	3224832	3229167	-	ENSRNOG00000006827	Tmem198b
19	42126936	42127538	+	NONRATT014272.2	19	42132526	42180362	-	ENSRNOG00000014505	Pmfbp1
9	16552752	16557010	+	NONRATT029186.2	9	16543687	16558456	+	ENSRNOG00000016315	Cnpy3
2	30227913	30228756	-	NONRATT016024.2	2	30175017	30246010	-	ENSRNOG00000017752	Mccc2
13	100294416	100295266	-	NONRATT009068.2	13	100300053	100405339	-	ENSRNOG00000031934	Enah
8	72822036	72841462	-	NONRATT028756.2	8	72815355	72842228	-	ENSRNOG00000018184	Tpm1
7	12381844	12382550	-	NONRATT026508.2	7	12382635	12393266	-	ENSRNOG00000016203	Efna2
18	77245140	77245545	-	NONRATT013956.2	18	77250849	77317969	-	ENSRNOG00000017146	RGD1560225
3	3461110	3463617	-	NONRATT019068.2	3	3453400	3476215	-	ENSRNOG00000017983	Ubac1
3	13922718	13923560	-	NONRATT019224.2	3	13916202	13933658	-	ENSRNOG00000018809	Psmd5
8	63436968	63445141	+	NONRATT027754.2	8	63379189	63445642	+	ENSRNOG00000009029	Nptn
1	80214468	80215287	-	NONRATT002354.2	1	80195531	80208448	+	ENSRNOG00000016603	Rtn2
4	155332841	155334290	+	NONRATT020878.2	4	155321552	155336191	+	ENSRNOG00000015505	Mfap5
6	105316157	105317508	+	ENSRNOT00000084962	6	105302557	105316024	-	ENSRNOG00000006976	Med6
3	35791286	35801357	-	NONRATT019285.2	3	35783622	35801614	-	ENSRNOG00000004740	Mmadhc
15	52234894	52235978	+	NONRATT010573.2	15	52241800	52261276	+	ENSRNOG00000011427	Hr
8	76904644	76940195	-	NONRATT027846.2	8	76903373	76903491	+	ENSRNOG00000056888	SNORA20
11	62315089	62326567	+	NONRATT006585.2	11	62014924	62451184	-	ENSRNOG00000056716	Zbtb20
4	125684807	125690672	-	NONRATT021642.2	4	125690233	125808281	-	ENSRNOG00000022060	Magi1
12	47554890	47555769	+	NONRATT007616.2	12	47551934	47555589	+	ENSRNOG00000037566	RGD1560398
10	57132534	57132857	+	NONRATT004493.2	10	57125960	57128686	+	ENSRNOG00000026488	Gltpd2
7	127004829	127006406	+	NONRATT026206.2	7	127015161	127058056	-	ENSRNOG00000017022	Cerk
1	276373380	276385694	+	NONRATT001878.2	1	276310071	276487667	+	ENSRNOG00000042786	Vti1a
7	122835077	122844325	+	NONRATT026142.2	7	122818974	122861296	+	ENSRNOG00000000190	Ep300
4	97635390	97755312	+	NONRATT020529.2	4	97657670	97760102	+	ENSRNOG00000050231	Gng12
2	196120609	196122901	+	NONRATT015539.2	2	196105568	196113149	-	ENSRNOG00000053812	Selenbp1
2	104783880	104802871	+	NONRATT015182.2	2	104789422	104830898	-	ENSRNOG00000031406	Hps3
1	221214708	221215554	-	NONRATT003474.2	1	221213307	221233921	-	ENSRNOG00000020881	Frmd8
20	7901153	7906141	+	NONRATT017214.2	20	7895082	7906142	+	ENSRNOG00000000504	Fance
2	14699896	14701026	-	NONRATT015950.2	2	14699881	14701903	-	ENSRNOG00000030237	Cox7c
9	41303760	41307698	-	NONRATT029905.2	9	41305569	41337498	-	ENSRNOG00000023467	Fam168b
10	103206107	103219688	+	NONRATT005042.2	10	103206013	103248862	+	ENSRNOG00000024578	Ttyh2
X	65367911	65368639	+	ENSRNOT00000076358	X	65370850	65400298	-	ENSRNOG00000038132	Vsig4
5	172644958	172645383	-	NONRATT023938.2	5	172648949	172655576	+	ENSRNOG00000036876	RGD1308923
6	137995079	137997514	+	NONRATT024716.2	6	137997334	137998291	+	ENSRNOG00000005174	Tmem121
8	66870070	66874776	-	NONRATT028662.2	8	66866081	66893196	-	ENSRNOG00000014080	Kif23
13	109697161	109697848	+	NONRATT008570.2	13	109669679	109696918	+	ENSRNOG00000042286	LOC679582
1	78763043	78763789	+	NONRATT000388.2	1	78739929	78765692	+	ENSRNOG00000016145	Strn4
11	86091020	86092915	+	NONRATT006734.2	11	86092467	86092779	+	ENSRNOG00000050000	RGD1564318
2	143892789	143906197	+	NONRATT016385.2	2	143892566	143925633	+	ENSRNOG00000059480	Supt20
X	159194564	159206955	-	NONRATT031327.2	X	159176824	159206949	-	ENSRNOG00000027831	Map7d3
5	9423651	9429717	-	NONRATT023004.2	5	9403195	9429859	-	ENSRNOG00000007069	Adhfe1
7	12535526	12536405	+	NONRATT025587.2	7	12532874	12536797	+	ENSRNOG00000013545	Polr2e
4	120456410	120456988	-	NONRATT021600.2	4	120412397	120447278	+	ENSRNOG00000013195	Ruvbl1
13	56240287	56242041	+	NONRATT008275.2	13	56015900	56236674	+	ENSRNOG00000011063	Dennd1b
9	88645439	88662213	+	NONRATT029579.2	9	88607507	88662224	+	ENSRNOG00000015619	Agfg1
1	204979931	204997793	-	NONRATT003273.2	1	205001760	205040755	-	ENSRNOG00000017326	Ctbp2
13	52124503	52132798	-	NONRATT008745.2	13	52124634	52136127	-	ENSRNOG00000007040	Timm17a
7	141813219	141813947	+	NONRATT030736.2	7	141702037	141879951	+	ENSRNOG00000056106	Dip2b
13	81676168	81680292	+	NONRATT008399.2	13	81682017	81698833	-	ENSRNOG00000003861	Gorab
4	27464172	27467078	-	NONRATT021191.2	4	27438608	27473150	-	ENSRNOG00000007937	Krit1
15	18545506	18546268	+	NONRATT010304.2	15	18540912	18546854	+	ENSRNOG00000007895	Pdhb
2	206447548	206448260	+	NONRATT015655.2	2	206454207	206493030	+	ENSRNOG00000019785	Phtf1
16	19870156	19871250	+	NONRATT011379.2	16	19881121	19885500	+	ENSRNOG00000039417	Dda1
20	28077049	28077353	+	NONRATT017371.2	20	28078499	28157071	+	ENSRNOG00000028581	Ccdc138
5	151823421	151824772	-	NONRATT023684.2	5	151806457	151813954	+	ENSRNOG00000007083	Gpn2
5	103260937	103261932	+	NONRATT022360.2	5	103251985	103366264	+	ENSRNOG00000043151	Cntln
3	105661998	105667165	-	NONRATT019573.2	3	105661043	105663457	-	ENSRNOG00000043037	Zfp770
9	29577218	29577480	+	NONRATT029277.2	9	29584374	29585448	-	ENSRNOG00000048948	AABR07067082.1
1	57382301	57390349	+	NONRATT001590.2	1	57345576	57390470	+	ENSRNOG00000058790	Fam120b
8	71266168	71266853	-	NONRATT028701.2	8	71230829	71337746	-	ENSRNOG00000015977	Zfp609
1	198409423	198413497	+	NONRATT001212.2	1	198409359	198413497	+	ENSRNOG00000024144	Cdipt
10	70870238	70871017	+	ENSRNOT00000076677	10	70869512	70871066	-	ENSRNOG00000011205	Ccl3
2	57676447	57677338	+	NONRATT015092.2	2	57677744	57677905	+	ENSRNOG00000058320	AABR07008420.2
10	15203565	15204166	-	NONRATT005292.2	10	15197802	15200117	-	ENSRNOG00000019798	Stub1
7	123760939	123761535	+	NONRATT026174.2	7	123671027	123767797	-	ENSRNOG00000009585	Tcf20
7	3098221	3099235	-	NONRATT026398.2	7	3098244	3102142	-	ENSRNOG00000005987	Suox
14	17123587	17130060	+	NONRATT009254.2	14	17123359	17141767	+	ENSRNOG00000002247	Nup54
2	188214412	188215028	+	NONRATT015432.2	2	188141349	188212202	+	ENSRNOG00000020297	Gon4l
1	84699395	84700072	+	NONRATT000527.2	1	84685930	84698793	+	ENSRNOG00000029805	AABR07002774.1
4	7514699	7521230	-	NONRATT021113.2	4	7512325	7529106	-	ENSRNOG00000010435	Nupl2
13	108144723	108145040	-	NONRATT009110.2	13	108132498	108178609	-	ENSRNOG00000003388	Cenpf
10	74879327	74881130	+	NONRATT005850.2	10	74882067	74882804	+	ENSRNOG00000007367	2021-09-04
9	43358258	43362108	-	NONRATT029925.2	9	43331154	43353113	+	ENSRNOG00000016995	Zap70
14	85311714	85313205	-	NONRATT010106.2	14	85311832	85313187	+	ENSRNOG00000008951	Rasl10a
3	122968296	122969544	+	NONRATT018602.2	3	122976103	123084569	+	ENSRNOG00000021223	Ptpra
2	147778071	147778987	-	NONRATT016418.2	2	147774766	147779013	-	ENSRNOG00000043386	Commd2
10	54758240	54760321	-	NONRATT005554.2	10	54761870	54967585	-	ENSRNOG00000003947	Ntn1
1	163103654	163114932	-	NONRATT002942.2	1	163073123	163117235	-	ENSRNOG00000014251	Capn5
5	29579751	29589573	-	NONRATT023081.2	5	29573897	29601748	-	ENSRNOG00000008236	Decr1
10	45563440	45565140	-	NONRATT005475.2	10	45563546	45579029	-	ENSRNOG00000060229	Arf1
6	55497283	55499344	-	NONRATT024976.2	6	55479282	55487714	+	ENSRNOG00000005023	Agr2
1	100558174	100559180	-	NONRATT002599.2	1	100554543	100559942	-	ENSRNOG00000019812	Nr1h2
19	42132562	42133576	-	NONRATT014699.2	19	42132526	42180362	-	ENSRNOG00000014505	Pmfbp1
10	57240269	57240943	+	NONRATT004500.2	10	57218086	57237775	+	ENSRNOG00000033508	Mink1
5	92862228	92865113	-	NONRATT023334.2	5	92862266	93244202	-	ENSRNOG00000005711	Ptprd
18	41330519	41332576	-	NONRATT013810.2	18	41333550	41389510	-	ENSRNOG00000004033	Sema6a
13	70648260	70648638	+	NONRATT008321.2	13	70656726	70783515	-	ENSRNOG00000002680	Lamc1
13	68718740	68719501	+	NONRATT008301.2	13	68709224	68721653	+	ENSRNOG00000002618	Ivns1abp
8	87154562	87158029	-	NONRATT028808.2	8	87040798	87158368	-	ENSRNOG00000058470	Col12a1
2	1506043	1561362	-	NONRATT015917.2	2	1452115	1561464	-	ENSRNOG00000010286	Cast
12	22234294	22234985	-	NONRATT007847.2	12	22236164	22245100	-	ENSRNOG00000001410	Gigyf1
12	13127327	13127598	-	NONRATT007769.2	12	13114002	13157570	-	ENSRNOG00000001079	Daglb
10	104731762	104733140	-	NONRATT005051.2	10	104739152	104739862	-	ENSRNOG00000054282	AABR07072203.1
18	57827983	57828616	-	NONRATT013863.2	18	57827391	57866741	-	ENSRNOG00000019063	Fbxo38
7	11544998	11551068	+	NONRATT025534.2	7	11556191	11561056	+	ENSRNOG00000029738	Diras1
5	162934855	162944847	-	NONRATT023821.2	5	162891450	163119239	-	ENSRNOG00000016443	Vps13d
5	39257248	39258065	+	NONRATT022156.2	5	39251336	39257512	+	ENSRNOG00000007506	Ndufaf4
10	64590146	64593887	-	ENSRNOT00000075897	10	64567465	64657089	-	ENSRNOG00000056837	Abr
17	1812965	1814543	-	NONRATT012714.2	17	1818301	1818403	-	ENSRNOG00000058596	U6
3	79879811	79880665	+	NONRATT018352.2	3	79876937	79882319	+	ENSRNOG00000011414	Psmc3
10	13528412	13529603	-	NONRATT005247.2	10	13537032	13542077	-	ENSRNOG00000006542	Atp6v0c
12	47638277	47641231	-	NONRATT008070.2	12	47638273	47653638	-	ENSRNOG00000001191	Tchp
17	28113664	28114373	-	NONRATT012908.2	17	28104588	28191436	-	ENSRNOG00000000137	Ly86
3	7247332	7247940	+	NONRATT017944.2	3	7237191	7265145	+	ENSRNOG00000011470	Tsc1
8	118913706	118924289	-	NONRATT029024.2	8	118926477	118977051	+	ENSRNOG00000020946	Ccdc12
X	156703199	156703786	+	NONRATT000900.2	X	156655959	156705233	+	ENSRNOG00000056659	Mecp2
1	156288258	156289272	+	NONRATT000947.2	1	156283127	156291052	+	ENSRNOG00000022748	Tmem126a
18	48537911	48538839	+	NONRATT013439.2	18	48434651	48538023	+	ENSRNOG00000030486	Prdm6
1	198214825	198215242	+	NONRATT001204.2	1	198210524	198213816	+	ENSRNOG00000019721	Ypel3
12	19074282	19088370	-	NONRATT007815.2	12	19074582	19114399	-	ENSRNOG00000046643	Cyp3a9
10	73963039	73989884	-	NONRATT004731.2	10	73986011	73986294	+	ENSRNOG00000057299	7SK
6	44006623	44009412	-	ENSRNOT00000090534	6	44009871	44131387	+	ENSRNOG00000061050	Mboat2
18	76836551	76837011	+	NONRATT013935.2	18	76809143	76878981	-	ENSRNOG00000053640	Kcng2
6	1345358	1345982	-	NONRATT024753.2	6	1330313	1410339	-	ENSRNOG00000025926	Heatr5b
17	86409600	86410677	+	NONRATT012668.2	17	86408150	86409518	+	ENSRNOG00000016950	Otud1
4	14318275	14319961	-	NONRATT021144.2	4	14318273	14490446	-	ENSRNOG00000006526	Sema3c
17	1873925	1876198	-	NONRATT012716.2	17	1872847	1879279	-	ENSRNOG00000018566	Ctsl
1	225232254	225273896	+	NONRATT001527.2	1	225279675	225283326	-	ENSRNOG00000020196	Scgb1a1
15	36946913	36976278	-	NONRATT010931.2	15	36939634	36942924	+	ENSRNOG00000051238	Mphosph8
10	88532846	88533316	+	NONRATT004880.2	10	88498237	88533829	-	ENSRNOG00000017781	Dnajc7
5	153624897	153625573	-	NONRATT023711.2	5	153568744	153625869	-	ENSRNOG00000018109	Clic4
6	96167213	96171613	-	NONRATT025109.2	6	96164578	96171629	-	ENSRNOG00000007785	Trmt5
13	44896191	44897018	+	NONRATT008175.2	13	44812566	44950762	+	ENSRNOG00000004099	R3hdm1
18	14471200	14603485	+	NONRATT013244.2	18	14471212	14657332	+	ENSRNOG00000016671	Dtna
14	44340828	44341207	-	NONRATT009900.2	14	44289246	44348691	-	ENSRNOG00000027088	Ube2k
14	78132682	78135941	-	NONRATT009991.2	14	78129748	78211931	-	ENSRNOG00000007025	Evc2
12	30125183	30136842	-	NONRATT007908.2	12	30125167	30180115	-	ENSRNOG00000000901	Crcp
1	198307530	198308200	-	NONRATT003180.2	1	198298137	198301161	+	ENSRNOG00000029061	Hirip3
2	44181236	44196599	+	NONRATT015016.2	2	44096060	44196605	+	ENSRNOG00000013555	Ankrd55
14	82338001	82339370	-	NONRATT010061.2	14	82336323	82347679	-	ENSRNOG00000017259	Tacc3
10	35457035	35457781	+	NONRATT004212.2	10	35392761	35459267	+	ENSRNOG00000003005	Rasgef1c
19	54838068	54840593	+	NONRATT014355.2	19	54766588	54840569	+	ENSRNOG00000019140	Banp
1	23600973	23602468	+	NONRATT000097.2	1	23409407	23610164	+	ENSRNOG00000016627	Eya4
16	74225846	74234548	+	NONRATT011630.2	16	74237000	74260271	+	ENSRNOG00000019150	Polb
18	44889888	44897599	+	NONRATT013425.2	18	44810471	44897580	+	ENSRNOG00000015840	Hsd17b4
4	66624215	66633450	+	NONRATT020384.2	4	66445265	66624912	-	ENSRNOG00000007034	Hipk2
19	24855662	24856385	-	NONRATT014548.2	19	24855298	24875137	-	ENSRNOG00000004489	Adgre5
1	78008196	78009603	+	NONRATT000375.2	1	78015721	78023676	+	ENSRNOG00000001493	Kptn
18	69735514	69736680	-	NONRATT013918.2	18	69738685	69784099	-	ENSRNOG00000015582	Me2
8	85471097	85472694	+	NONRATT027900.2	8	85417837	85472694	+	ENSRNOG00000008691	Ick
1	247142597	247144974	-	NONRATT003696.2	1	247144490	247169693	-	ENSRNOG00000052506	Ak3
15	106592597	106593097	+	NONRATT010693.2	15	106434176	106625837	+	ENSRNOG00000011203	Farp1
17	10413104	10413526	+	NONRATT012290.2	17	10415122	10439691	-	ENSRNOG00000017917	Cdhr2
8	132146503	132147161	-	NONRATT029106.2	8	132135186	132156683	+	ENSRNOG00000004320	Tgm4
10	18443591	18444108	+	NONRATT004152.2	10	18140355	18443934	-	ENSRNOG00000005042	Ranbp17
8	117725671	117726841	+	NONRATT028059.2	8	117727876	117728764	+	ENSRNOG00000020655	Ucn2
18	2106447	2106937	+	NONRATT013209.2	18	2103435	2103704	+	ENSRNOG00000057193	7SK
7	83565002	83582501	+	NONRATT025949.2	7	83564562	83582508	+	ENSRNOG00000004220	Ebag9
20	19383322	19407755	-	NONRATT017715.2	20	19411368	19411691	+	ENSRNOG00000061076	7SK
17	76994208	76995316	-	NONRATT013111.2	17	76995042	77093308	-	ENSRNOG00000017933	Ccdc3
15	51869056	51869870	-	NONRATT011050.2	15	51859461	51890832	-	ENSRNOG00000008829	Sorbs3
11	76169674	76171502	+	NONRATT006674.2	11	76147204	76168989	+	ENSRNOG00000001931	Fgf12
7	116446403	116447400	+	NONRATT026029.2	7	116373323	116504853	-	ENSRNOG00000037375	RGD1565410
12	46858078	46859723	-	ENSRNOT00000079447	12	46863203	46863344	-	ENSRNOG00000052742	U4
5	127843232	127845013	-	NONRATT023459.2	5	127847128	127878792	-	ENSRNOG00000010859	Zyg11b
2	47120339	47123004	-	NONRATT016140.2	2	47127218	47281421	-	ENSRNOG00000053550	Itga1
15	45778710	45780395	+	NONRATT010537.2	15	45712855	45780405	+	ENSRNOG00000009802	Fam124a
15	48445766	48564098	-	NONRATT011024.2	15	48422917	48445588	-	ENSRNOG00000013581	Extl3
5	8761301	8832473	-	NONRATT022994.2	5	8666199	8760458	+	ENSRNOG00000005703	Arfgef1
1	224972216	224973530	-	NONRATT003546.2	1	224970806	224972168	+	ENSRNOG00000019266	Tmem223
1	199448478	199452751	-	NONRATT003234.2	1	199437831	199439210	-	ENSRNOG00000019675	Pycard
5	149062771	149066899	+	NONRATT022680.2	5	149047680	149069719	+	ENSRNOG00000011054	Laptm5
X	45518501	45520324	-	NONRATT030984.2	X	45519227	45522665	-	ENSRNOG00000026157	RGD1562200
1	165724422	165865139	+	NONRATT001018.2	1	165724450	165878652	+	ENSRNOG00000018873	Fam168a
15	44434338	44437975	+	NONRATT010998.2	15	44411864	44439236	+	ENSRNOG00000012951	Kctd9
13	106682643	106683353	+	NONRATT008556.2	13	106463367	106683436	+	ENSRNOG00000002593	Esrrg
X	72076566	72077591	-	NONRATT031065.2	X	72074201	72077590	-	ENSRNOG00000003201	LOC100362640
1	201889051	201917989	-	NONRATT003259.2	1	201881835	201894775	-	ENSRNOG00000029945	Cuzd1
17	27247330	27248101	-	NONRATT012894.2	17	27243780	27279260	-	ENSRNOG00000013756	Snrnp48
17	24056964	24103297	-	NONRATT012888.2	17	24021735	24103515	-	ENSRNOG00000017951	Ranbp9
8	68965482	68967013	-	NONRATT028682.2	8	68898295	68966108	-	ENSRNOG00000009173	Smad6
14	105050654	105053828	-	NONRATT010173.2	14	105047918	105055421	-	ENSRNOG00000005464	Lgalsl
3	82324818	82325645	-	NONRATT019484.2	3	82324353	82368357	-	ENSRNOG00000000047	Cd82
17	79761094	79777731	-	NONRATT013136.2	17	79749746	79752545	+	ENSRNOG00000051589	AABR07028665.1
13	49811624	49813462	-	NONRATT008705.2	13	49792793	49828720	-	ENSRNOG00000009696	Mdm4
20	27439783	27440609	+	NONRATT017361.2	20	27366212	27437427	+	ENSRNOG00000000277	Tet1
8	77029345	77031374	-	NONRATT027845.2	8	76977821	77022837	+	ENSRNOG00000054446	Sltm
15	33714185	33714745	+	NONRATT010423.2	15	33721319	33725188	-	ENSRNOG00000025634	Zfhx2
7	70580274	70582825	+	NONRATT025875.2	7	70585012	70602310	-	ENSRNOG00000025459	Mars
12	22802620	22803359	-	NONRATT007854.2	12	22803854	22811058	-	ENSRNOG00000031346	Ift22
10	36716855	36725597	+	NONRATT004233.2	10	36715564	36733133	+	ENSRNOG00000003714	Clk4
4	144545822	144566542	-	NONRATT021692.2	4	144536728	144620731	-	ENSRNOG00000005907	Rad18
4	8200246	8201255	-	NONRATT021121.2	4	8187750	8214555	-	ENSRNOG00000021614	Kmt2e
5	63917131	63918291	+	NONRATT022259.2	5	63917742	63918553	+	ENSRNOG00000043262	AC142180.1
2	257448856	257452745	+	NONRATT015874.2	2	257453346	257484587	-	ENSRNOG00000012512	Nexn
15	106585384	106585782	+	NONRATT010692.2	15	106434176	106625837	+	ENSRNOG00000011203	Farp1
5	148299385	148301165	+	NONRATT022669.2	5	148257641	148311645	+	ENSRNOG00000031475	Col16a1
14	3223034	3232263	+	NONRATT009185.2	14	3204389	3247695	+	ENSRNOG00000002054	Glmn
4	157643396	157644211	+	NONRATT020909.2	4	157637043	157637179	+	ENSRNOG00000054983	SCARNA11
1	200088752	200089178	+	NONRATT001258.2	1	200037748	200116524	+	ENSRNOG00000020388	Inpp5f
4	80088903	80107886	-	NONRATT021413.2	4	80025439	80107884	-	ENSRNOG00000010011	Osbpl3
1	65523342	65530438	+	NONRATT000291.2	1	65522117	65533212	+	ENSRNOG00000027550	Mzf1
9	95067934	95069115	+	NONRATT029644.2	9	95072111	95143092	-	ENSRNOG00000018395	Usp40
5	139402486	139403350	+	NONRATT022580.2	5	139385428	139466081	+	ENSRNOG00000032183	Scmh1
3	11069146	11069916	+	NONRATT018030.2	3	10999185	11070638	+	ENSRNOG00000023393	Nup214
19	25783685	25784371	-	NONRATT014565.2	19	25783899	25790077	-	ENSRNOG00000002864	Nacc1
5	153729049	153737161	-	NONRATT023718.2	5	153729249	153737161	-	ENSRNOG00000048139	Ncmap
1	84308181	84308610	+	NONRATT000516.2	1	84304227	84324560	+	ENSRNOG00000018369	Prx
4	157457862	157460333	+	ENSRNOT00000074731	4	157452606	157457249	+	ENSRNOG00000016589	Mlf2
15	8129924	8176654	+	NONRATT010274.2	15	8179101	8183682	-	ENSRNOG00000008565	Nkiras1
10	40845379	40846250	+	NONRATT004289.2	10	40812857	40846252	+	ENSRNOG00000013186	G3bp1
1	192003566	192014649	-	NONRATT001165.2	1	191997511	192025350	-	ENSRNOG00000025353	Ears2
5	135388367	135390134	+	NONRATT022522.2	5	135351815	135387648	+	ENSRNOG00000016183	Ipp
4	122295767	122314248	+	NONRATT020714.2	4	122314457	122337389	-	ENSRNOG00000017959	Ccdc37
1	198734172	198734510	-	NONRATT003206.2	1	198744049	198781750	+	ENSRNOG00000017980	Itgal
7	96463166	96464956	+	NONRATT025967.2	7	96438045	96464049	-	ENSRNOG00000004854	Has2
2	251862700	251863008	+	NONRATT015860.2	2	251863068	251894037	+	ENSRNOG00000026186	Syde2
18	79447385	79448248	-	NONRATT013964.2	18	79451203	79543219	-	ENSRNOG00000016303	Zfp236
9	44416111	44416911	-	NONRATT029942.2	9	44351950	44419998	-	ENSRNOG00000058681	Tsga10
2	187670721	187675355	+	NONRATT015413.2	2	187659108	187668663	-	ENSRNOG00000037552	Tsacc
10	71323144	71325578	+	NONRATT004675.2	10	71322144	71358453	+	ENSRNOG00000053814	Synrg
6	136370385	136371877	-	NONRATT025372.2	6	136330447	136363671	+	ENSRNOG00000011572	Klc1
4	118243597	118244128	+	NONRATT020664.2	4	118243131	118271768	+	ENSRNOG00000017380	RGD1306746
1	220871928	220872734	+	NONRATT001438.2	1	220869804	220873337	+	ENSRNOG00000020660	Cfl1
5	74972226	74982399	+	NONRATT022295.2	5	74941801	74982401	+	ENSRNOG00000011504	Akap2
19	37795707	37801510	+	NONRATT014215.2	19	37795657	37813424	+	ENSRNOG00000018954	Tsnaxip1
1	98401577	98403538	+	NONRATT000633.2	1	98398659	98402968	+	ENSRNOG00000037331	Cd33
10	15555179	15561965	+	NONRATT004126.2	10	15538871	15568638	+	ENSRNOG00000020488	Luc7l
3	97984592	97987222	-	NONRATT019553.2	3	97983685	97993684	-	ENSRNOG00000004891	Arl14ep
8	48959770	48961392	+	NONRATT027633.2	8	48925603	48958026	+	ENSRNOG00000053932	Ddx6
7	76748876	76749867	-	NONRATT026882.2	7	76750049	76780817	-	ENSRNOG00000025454	Rrm2b
2	181009669	181025963	-	NONRATT016498.2	2	181031054	181031161	+	ENSRNOG00000059488	U6
7	2778913	2779403	+	NONRATT025459.2	7	2780929	2786856	-	ENSRNOG00000029571	Coq10a
2	251534906	251607676	+	ENSRNOT00000090803	2	251534534	251534744	+	ENSRNOG00000058696	AABR07013701.2
8	70572342	70573165	+	NONRATT027801.2	8	70522091	70573424	+	ENSRNOG00000019105	Dpp8
12	39553902	39554264	+	NONRATT007528.2	12	39554170	39601778	+	ENSRNOG00000001285	Atp2a2
8	79804014	79804731	+	NONRATT028713.2	8	79792586	79801594	+	ENSRNOG00000052787	Rsl24d1
10	109472777	109473372	-	NONRATT006351.2	10	109446443	109479891	+	ENSRNOG00000043102	Bahcc1
1	231400596	231401792	-	NONRATT003611.2	1	231394606	231530786	-	ENSRNOG00000013239	Tle4
17	9331907	9344054	+	NONRATT012259.2	17	9282674	9344678	+	ENSRNOG00000011523	H2afy
16	54832178	54833096	+	NONRATT011531.2	16	54765324	54856225	+	ENSRNOG00000011420	Mtmr7
13	52671455	52680992	+	NONRATT008255.2	13	52667968	52680794	+	ENSRNOG00000033734	Tnnt2
11	79611323	79611970	-	NONRATT006684.2	11	79205729	79703736	-	ENSRNOG00000031669	Lpp
20	45428715	45538619	+	NONRATT017434.2	20	45443712	45445137	-	ENSRNOG00000016336	LOC100361476
17	78791765	78792735	-	NONRATT013128.2	17	78793335	78793724	+	ENSRNOG00000038047	Mt1
2	1525040	1528236	+	NONRATT014858.2	2	1452115	1561464	-	ENSRNOG00000010286	Cast
1	266393622	266396316	-	NONRATT003877.2	1	266380972	266412893	+	ENSRNOG00000020020	Wbp1l
9	69953391	69955773	+	NONRATT029459.2	9	69954505	69954675	+	ENSRNOG00000058794	uc_338
12	51289093	51289580	-	NONRATT008096.2	12	51281986	51341663	-	ENSRNOG00000000665	Pitpnb
11	27136255	27137820	-	NONRATT006834.2	11	27130171	27141881	-	ENSRNOG00000001592	Cct8
10	59359833	59360263	-	NONRATT005666.2	10	59344469	59360661	-	ENSRNOG00000024553	Cyb5d2
20	44679480	44680275	-	NONRATT017803.2	20	44680448	44722872	+	ENSRNOG00000000595	Traf3ip2
16	8297075	8300960	+	NONRATT011303.2	16	8302949	8323293	+	ENSRNOG00000019768	Ncoa4
5	135443205	135444424	+	NONRATT022527.2	5	135412255	135439577	+	ENSRNOG00000037595	Gpbp1l1
12	11557765	11558185	-	NONRATT007752.2	12	11537950	11626916	-	ENSRNOG00000025244	Trrap
4	10422458	10423162	-	NONRATT021139.2	4	10295121	10421415	+	ENSRNOG00000012932	Ccdc146
4	180059150	180085833	+	NONRATT021038.2	4	180062798	180132145	+	ENSRNOG00000015986	Rassf8
6	111135366	111136123	-	NONRATT025245.2	6	111127700	111128735	-	ENSRNOG00000011719	Ngb
2	140618690	140619083	+	NONRATT015277.2	2	140576187	140618405	-	ENSRNOG00000013045	Setd7
8	53841768	53842039	-	NONRATT028533.2	8	53839097	53899669	-	ENSRNOG00000031890	Ncam1
10	85655223	85658023	-	NONRATT005960.2	10	85658323	85684138	-	ENSRNOG00000013030	Pip4k2b
1	276715770	276721735	+	NONRATT001885.2	1	276659541	276730514	+	ENSRNOG00000049232	Tcf7l2
15	23601432	23610937	-	NONRATT010801.2	15	23619122	23639628	+	ENSRNOG00000010178	Cgrrf1
16	10776557	10777040	-	NONRATT011785.2	16	10758526	10802512	-	ENSRNOG00000052469	Bmpr1a
2	27236102	27236615	+	NONRATT014946.2	2	27107317	27236672	+	ENSRNOG00000014549	Arhgef26
6	22311177	22316888	+	NONRATT024047.2	6	22296127	22316894	+	ENSRNOG00000027126	Dpy30
1	101290207	101290842	-	NONRATT002627.2	1	101293408	101323960	-	ENSRNOG00000020714	Trpm4
10	64869828	64870401	-	NONRATT004631.2	10	64815487	64862288	-	ENSRNOG00000009566	Phf12
7	123259036	123259713	+	NONRATT026157.2	7	123238332	123259636	-	ENSRNOG00000005577	Desi1
4	27966578	27967262	-	NONRATT021205.2	4	27785646	27966398	-	ENSRNOG00000009258	Cdk6
10	85461978	85462476	-	NONRATT005955.2	10	85460058	85517683	-	ENSRNOG00000011475	Srcin1
19	41553165	41554305	-	NONRATT014677.2	19	41559486	41567013	-	ENSRNOG00000016971	Zfp612
16	74220070	74223520	+	NONRATT011629.2	16	74177214	74230815	+	ENSRNOG00000019073	Ikbkb
4	157074610	157075440	-	NONRATT021832.2	4	157043924	157078130	-	ENSRNOG00000011156	Clstn3
20	32232535	32233017	+	NONRATT017400.2	20	32213147	32232632	-	ENSRNOG00000043099	Ddx21
17	10507177	10559600	-	NONRATT012804.2	17	10558713	10559627	-	ENSRNOG00000017372	Higd2a
10	31341898	31342422	-	NONRATT005372.2	10	31278763	31359699	-	ENSRNOG00000006557	Cyfip2
7	142941434	142944169	+	ENSRNOT00000086833	7	142929399	142938554	+	ENSRNOG00000007756	Atg101
2	54900803	54901208	+	NONRATT015058.2	2	54857687	54893404	+	ENSRNOG00000012799	Prkaa1
13	89601895	89606688	-	NONRATT008957.2	13	89591717	89594738	-	ENSRNOG00000003398	Tomm40l
10	38716988	38725068	+	NONRATT004254.2	10	38692210	38773021	+	ENSRNOG00000006965	Aff4
19	23542614	23608598	-	NONRATT014534.2	19	23542888	23554594	-	ENSRNOG00000003439	Il15
6	27193600	27194198	+	NONRATT024096.2	6	27151611	27190132	-	ENSRNOG00000009790	Kcnk3
10	730276	750521	+	NONRATT004037.2	10	730246	751061	+	ENSRNOG00000053230	Fopnl
8	63259574	63287096	-	NONRATT028637.2	8	63291610	63291966	-	ENSRNOG00000051681	AABR07070278.1
8	91321552	91338187	-	NONRATT028826.2	8	91310629	91338843	-	ENSRNOG00000009773	Elovl4
16	71853426	71888300	+	NONRATT011606.2	16	71889234	71999148	+	ENSRNOG00000025728	Adam32
2	118741644	118746134	-	NONRATT016309.2	2	118746332	118746753	+	ENSRNOG00000053688	AABR07009965.1
14	10842111	10850538	+	NONRATT009220.2	14	10854681	10909612	+	ENSRNOG00000002251	Sec31a
7	137857067	137858335	+	NONRATT026260.2	7	137804018	137856485	-	ENSRNOG00000005263	LOC688906
X	119199638	119203708	+	NONRATT030740.2	X	119210066	119210217	-	ENSRNOG00000060483	uc_338
6	96896411	96897170	+	NONRATT024399.2	6	96871624	96893444	+	ENSRNOG00000009296	Snapc1
12	51535583	51536032	-	NONRATT008099.2	12	51385762	51702730	-	ENSRNOG00000032590	Ttc28
18	29330301	29332084	-	NONRATT013753.2	18	29329763	29340403	-	ENSRNOG00000018646	Hbegf
19	25123985	25127069	-	NONRATT014550.2	19	25095088	25118860	+	ENSRNOG00000005257	Prkaca
15	37047991	37050076	-	NONRATT010934.2	15	37042395	37056892	-	ENSRNOG00000029220	Zmym5
12	24543846	24548614	-	NONRATT007882.2	12	24543758	24556976	-	ENSRNOG00000032705	Bcl7b
17	52292896	52295186	-	NONRATT012982.2	17	52295003	52477575	-	ENSRNOG00000014395	Gli3
8	54954669	54961250	-	NONRATT028539.2	8	54954225	54961265	-	ENSRNOG00000009250	Pts
5	155351831	155353208	-	NONRATT023740.2	5	155346964	155381732	-	ENSRNOG00000022039	Zbtb40
2	197863430	197873137	-	NONRATT016665.2	2	197861114	197878142	-	ENSRNOG00000057194	Tars2
12	38690138	38690928	+	NONRATT007506.2	12	38662302	38691075	-	ENSRNOG00000056017	Bcl7a
1	219449072	219449450	-	NONRATT003425.2	1	219439952	219443570	+	ENSRNOG00000018708	Ppp1ca
5	72103688	72120337	+	NONRATT022284.2	5	72103703	72141700	+	ENSRNOG00000016137	Rad23b
X	116751229	116751951	-	NONRATT031233.2	X	116751229	116792864	-	ENSRNOG00000007345	Amot
3	46387681	46389816	-	NONRATT019319.2	3	46365164	46457201	-	ENSRNOG00000007012	Ly75
9	88091123	88096115	+	NONRATT029567.2	9	88033667	88086488	-	ENSRNOG00000014597	Irs1
3	149161824	149168959	+	NONRATT018771.2	3	149131784	149208786	+	ENSRNOG00000010625	Dnmt3b
13	75060245	75060526	+	NONRATT008346.2	13	75059926	75066823	+	ENSRNOG00000057851	AABR07021501.1
6	129835782	129836619	+	NONRATT024600.2	6	129835918	129902793	+	ENSRNOG00000005274	Vrk1
7	26309276	26327537	-	NONRATT026624.2	7	26256458	26306126	+	ENSRNOG00000008174	Appl2
5	127266113	127273064	-	NONRATT023451.2	5	127266823	127273656	-	ENSRNOG00000023213	Dmrtb1
13	103311011	103313675	+	NONRATT008539.2	13	103300931	103371577	+	ENSRNOG00000002393	Eprs
9	51400305	51538063	+	NONRATT029357.2	9	51519294	51519401	-	ENSRNOG00000056424	U6
9	17347880	17354193	+	NONRATT029216.2	9	17340340	17355681	+	ENSRNOG00000019598	Vegfa
8	128824484	128852925	+	NONRATT028169.2	8	128829679	128842739	+	ENSRNOG00000018700	Mobp
17	43617462	43617705	+	NONRATT012478.2	17	43614100	43614844	-	ENSRNOG00000017175	Hist1h1a
1	29419591	29425235	+	NONRATT000112.2	1	29413364	29423347	+	ENSRNOG00000014190	Hint3
2	216941790	216950409	+	NONRATT015709.2	2	216863427	217056523	+	ENSRNOG00000023148	Col11a1
13	101444142	101444555	-	NONRATT009087.2	13	101451931	101597570	-	ENSRNOG00000003635	Disp1
8	33389736	33392240	+	NONRATT027551.2	8	33239138	33392305	+	ENSRNOG00000008709	Arhgap32
3	145806436	145834216	-	NONRATT019785.2	3	145810435	145810834	-	ENSRNOG00000050729	AABR07054265.1
7	142860558	142861925	-	ENSRNOT00000077084	7	142869751	142878012	+	ENSRNOG00000007346	Grasp
18	25221518	25252669	+	NONRATT013295.2	18	25163560	25222135	+	ENSRNOG00000012852	Bin1
15	37788762	37790288	+	NONRATT010479.2	15	37790271	37807142	+	ENSRNOG00000051120	Il17d
9	82436837	82437915	+	NONRATT029533.2	9	82436515	82444668	+	ENSRNOG00000019506	Dnajb2
5	150730621	150733272	+	NONRATT022695.2	5	150719568	150723321	-	ENSRNOG00000013300	Atpif1
20	38945267	38947081	+	NONRATT017411.2	20	38935819	38963309	+	ENSRNOG00000000808	Hsf2
10	12879892	12882116	-	NONRATT005230.2	10	12885532	12892446	-	ENSRNOG00000021872	Zfp213
18	29618056	29629077	-	NONRATT013765.2	18	29608587	29611212	-	ENSRNOG00000016894	Dnd1
4	66017601	66018381	-	NONRATT021344.2	4	66011914	66062089	-	ENSRNOG00000013948	Zc3hav1
13	76546829	76547386	-	NONRATT008862.2	13	76454161	76660043	-	ENSRNOG00000042860	Pappa2
1	167239232	167246429	-	NONRATT003005.2	1	167246108	167308827	-	ENSRNOG00000020347	Nup98
11	85002317	85002994	+	NONRATT006729.2	11	84972131	85000681	+	ENSRNOG00000022792	Lamp3
9	63456876	63457474	-	NONRATT030035.2	9	63459094	63637677	-	ENSRNOG00000010188	Satb2
X	71589145	71600231	+	ENSRNOT00000092164	X	71540928	71585908	+	ENSRNOG00000003359	Ogt
13	98887764	98889717	+	NONRATT008515.2	13	98857176	98889716	+	ENSRNOG00000003084	Parp1
1	193388825	193391617	+	NONRATT001182.2	1	193335644	193391638	+	ENSRNOG00000014565	Lcmt1
8	115170946	115171500	-	NONRATT028948.2	8	115155469	115165706	+	ENSRNOG00000012406	Pcbp4
20	12305254	12308184	+	NONRATT017280.2	20	12225201	12332858	+	ENSRNOG00000001229	Col18a1
14	17438858	17439632	+	NONRATT009258.2	14	17371452	17436897	-	ENSRNOG00000002301	Uso1
10	25835231	25835531	-	NONRATT005356.2	10	25832071	25847994	-	ENSRNOG00000003177	Mat2b
7	121335542	121337091	+	NONRATT026122.2	7	121311014	121334437	+	ENSRNOG00000017108	Syngr1
9	81960767	81961881	+	NONRATT029518.2	9	81940629	81954686	+	ENSRNOG00000017129	Ttll4
6	18951241	18952774	+	NONRATT024038.2	6	18956386	18956462	+	ENSRNOG00000056685	U6
3	46489188	46490271	-	NONRATT019320.2	3	46488962	46621873	-	ENSRNOG00000008129	Pla2r1
19	25747622	25748567	+	NONRATT014136.2	19	25526750	25749550	+	ENSRNOG00000052707	Cacna1a
20	27708991	27709676	-	NONRATT017739.2	20	27703731	27757149	-	ENSRNOG00000000824	Dse
1	62112200	62113074	-	NONRATT002224.2	1	62112796	62114672	-	ENSRNOG00000047884	AABR07001923.1
2	84658212	84658696	+	NONRATT015129.2	2	84667632	84678790	-	ENSRNOG00000011632	Cct5
1	174778832	174779246	+	NONRATT001090.2	1	174767959	174786361	+	ENSRNOG00000010017	Wee1
5	48717228	48717654	+	NONRATT022170.2	5	48561338	48779207	+	ENSRNOG00000007867	Rngtt
20	6986126	6986777	+	NONRATT017186.2	20	6973397	6990023	+	ENSRNOG00000000528	Fgd2
5	167661991	167664505	+	NONRATT022881.2	5	167672144	167696348	-	ENSRNOG00000018229	Slc45a1
6	108315008	108315876	-	NONRATT024496.2	6	108285821	108308587	+	ENSRNOG00000011918	Vsx2
20	12324022	12324760	+	NONRATT017282.2	20	12334675	12352377	-	ENSRNOG00000001232	Slc19a1
7	121139145	121151358	-	NONRATT027127.2	7	121136066	121153383	-	ENSRNOG00000016875	Cbx7
10	105787897	105788355	-	NONRATT006308.2	10	105796679	105815696	+	ENSRNOG00000000247	Mfsd11
19	14432812	14440925	+	ENSRNOT00000082870	19	14392422	14426491	+	ENSRNOG00000014093	Tom1
11	87728052	87731564	+	NONRATT006758.2	11	87722349	87733734	+	ENSRNOG00000000288	Scarf2
4	116891613	116904091	-	NONRATT021554.2	4	116893982	116894106	-	ENSRNOG00000058095	SNORA17
4	118207875	118208562	+	NONRATT020656.2	4	118187133	118198029	-	ENSRNOG00000016704	Pcyox1
11	31104812	31131112	-	NONRATT006855.2	11	31104786	31180636	-	ENSRNOG00000002051	Synj1
1	100475469	100476627	+	NONRATT000661.2	1	100473642	100477351	+	ENSRNOG00000019442	Josd2
13	70674636	70675014	-	NONRATT008818.2	13	70656726	70783515	-	ENSRNOG00000002680	Lamc1
6	104611038	104613658	+	NONRATT024450.2	6	104611025	104615302	+	ENSRNOG00000005513	Srsf5
3	8794320	8794616	+	NONRATT018002.2	3	8802851	8828533	+	ENSRNOG00000025296	Lrrc8a
4	22091259	22093296	+	NONRATT020186.2	4	22081603	22116265	+	ENSRNOG00000006779	Crot
6	43345898	43346392	+	NONRATT024208.2	6	43348957	43363335	-	ENSRNOG00000059402	Itgb1bp1
17	30983670	30993964	+	NONRATT012415.2	17	30965941	30994410	+	ENSRNOG00000017093	Pxdc1
11	46191167	46206316	+	NONRATT006527.2	11	46179939	46206478	+	ENSRNOG00000001633	Tfg
[truncated: 18,057 more rows]
