# Supplementary material for: Integrated analysis of long noncoding RNAs and mRNA expression profiles reveals the potential role of lncRNAs in early stage of post-peripheral nerve injury in Sprague-Dawley rats
Source: Aging (Albany NY). 2021 May 8;13(10):13909–25. doi: 10.18632/aging.202989 (PMC8202893; doi:10.18632/aging.202989)
Supplement: Supplementary Table 2 [file aging-13-202989-s002.xlsx]

## Sheet: lncRNA_trans_prediction
Supplementary Table 2. Trans-target gene prediction.
lncRNA_id	Trans_Target_mRNA	Trans_Target_gene	gene_name	Trans_Evalue
NONRATT002316.2	ENSRNOT00000021917	ENSRNOG00000016279	Zfp865	-78.1
NONRATT025316.2	ENSRNOT00000076439	ENSRNOG00000014909	Sh2d5	-79
NONRATT025316.2	ENSRNOT00000024465	ENSRNOG00000017938	Btaf1	-86.7
NONRATT025316.2	ENSRNOT00000019703	ENSRNOG00000014493	Golga1	-94.9
NONRATT025316.2	ENSRNOT00000083109	ENSRNOG00000000503	Ppard	-94.9
NONRATT025316.2	ENSRNOT00000011941	ENSRNOG00000008694	Miox	-78.4
NONRATT025316.2	ENSRNOT00000060193	ENSRNOG00000039297	Mrpl52	-87
NONRATT025316.2	ENSRNOT00000004244	ENSRNOG00000003176	Mixl1	-92.7
NONRATT025316.2	ENSRNOT00000014478	ENSRNOG00000009549	Fbxo3	-77.6
NONRATT025316.2	ENSRNOT00000003823	ENSRNOG00000002843	Cxcl6	-92.5
NONRATT025316.2	ENSRNOT00000091442	ENSRNOG00000022402	Luzp1	-82.5
NONRATT025316.2	ENSRNOT00000020069	ENSRNOG00000014909	Sh2d5	-79
NONRATT025316.2	ENSRNOT00000009709	ENSRNOG00000007333	Wdr20	-84.9
NONRATT025316.2	ENSRNOT00000009430	ENSRNOG00000007018	Mapkbp1	-89.4
NONRATT025316.2	ENSRNOT00000086719	ENSRNOG00000007115	Crebl2	-89.4
NONRATT025316.2	ENSRNOT00000030462	ENSRNOG00000010345	Ssmem1	-92.2
NONRATT025316.2	ENSRNOT00000077313	ENSRNOG00000052687	Megf8	-94.8
NONRATT025316.2	ENSRNOT00000081140	ENSRNOG00000052415	Gstt2	-94.1
NONRATT025316.2	ENSRNOT00000002465	ENSRNOG00000001807	Sspn	-85.3
NONRATT025316.2	ENSRNOT00000031044	ENSRNOG00000024266	Haus5	-94.1
NONRATT025316.2	ENSRNOT00000085812	ENSRNOG00000009172	Cpvl	-94.9
NONRATT025316.2	ENSRNOT00000002028	ENSRNOG00000001480	Ncf1	-86.2
NONRATT025316.2	ENSRNOT00000012379	ENSRNOG00000009227	Aplnr	-82.8
NONRATT025316.2	ENSRNOT00000086888	ENSRNOG00000003629	Nvl	-86.5
NONRATT025316.2	ENSRNOT00000010238	ENSRNOG00000007508	Lrtm2	-88.7
NONRATT025316.2	ENSRNOT00000008282	ENSRNOG00000006237	Gpr37l1	-94.9
NONRATT025316.2	ENSRNOT00000090536	ENSRNOG00000015616	Rgs14	-82.6
NONRATT025316.2	ENSRNOT00000091284	ENSRNOG00000056703	Atrx	-81.2
NONRATT025316.2	ENSRNOT00000085488	ENSRNOG00000052167	Marveld2	-77.1
NONRATT025316.2	ENSRNOT00000010056	ENSRNOG00000007637	Acer2	-94.9
NONRATT025316.2	ENSRNOT00000015016	ENSRNOG00000011304	LOC100360397	-81
NONRATT025316.2	ENSRNOT00000081037	ENSRNOG00000061262	Huwe1	-80.8
NONRATT025316.2	ENSRNOT00000075344	ENSRNOG00000046002	LOC301124	-83
NONRATT025316.2	ENSRNOT00000030559	ENSRNOG00000028185	Tstd3	-76
NONRATT025316.2	ENSRNOT00000015556	ENSRNOG00000011649	Epb42	-87.5
NONRATT025316.2	ENSRNOT00000010468	ENSRNOG00000007548	Polr3f	-80.3
NONRATT025316.2	ENSRNOT00000010753	ENSRNOG00000007851	Psma3	-91.5
NONRATT025316.2	ENSRNOT00000002520	ENSRNOG00000001842	Mrps35	-83
NONRATT025316.2	ENSRNOT00000073220	ENSRNOG00000045795	Pddc1	-81.6
NONRATT025316.2	ENSRNOT00000025342	ENSRNOG00000018752	Clcf1	-93
NONRATT025316.2	ENSRNOT00000043737	ENSRNOG00000030688	Lrrc2	-87.2
NONRATT025316.2	ENSRNOT00000026414	ENSRNOG00000019414	Tmem79	-89
NONRATT025316.2	ENSRNOT00000089138	ENSRNOG00000019232	RGD1311345	-94.1
NONRATT025316.2	ENSRNOT00000027753	ENSRNOG00000020463	Eif1ad	-76.5
NONRATT025316.2	ENSRNOT00000005715	ENSRNOG00000004263	Ints7	-89.5
NONRATT025316.2	ENSRNOT00000044541	ENSRNOG00000030363	Psma8	-89.1
NONRATT025316.2	ENSRNOT00000081539	ENSRNOG00000054581	Tmem101	-94.1
NONRATT025316.2	ENSRNOT00000010730	ENSRNOG00000008118	Sync	-94.9
NONRATT025316.2	ENSRNOT00000001923	ENSRNOG00000001419	Cldn15	-89.6
NONRATT025316.2	ENSRNOT00000079641	ENSRNOG00000014461	Galns	-87.8
NONRATT025316.2	ENSRNOT00000068666	ENSRNOG00000019196	Xpnpep3	-93
NONRATT025316.2	ENSRNOT00000019991	ENSRNOG00000014712	Zfp39	-86.1
NONRATT025316.2	ENSRNOT00000016040	ENSRNOG00000011964	Abcd4	-91.5
NONRATT025316.2	ENSRNOT00000042289	ENSRNOG00000027867	Rexo4	-83.3
NONRATT025316.2	ENSRNOT00000090170	ENSRNOG00000029938	Pik3c2b	-91.3
NONRATT025316.2	ENSRNOT00000089875	ENSRNOG00000005982	C1d	-94.1
NONRATT025316.2	ENSRNOT00000015568	ENSRNOG00000011652	Sppl2a	-88.7
NONRATT025316.2	ENSRNOT00000016993	ENSRNOG00000012564	RGD1564541	-91.2
NONRATT025316.2	ENSRNOT00000023706	ENSRNOG00000017349	Tbc1d10b	-94.9
NONRATT025316.2	ENSRNOT00000089016	ENSRNOG00000059463	Slc39a1	-85
NONRATT025316.2	ENSRNOT00000066103	ENSRNOG00000025324	Spire1	-94.1
NONRATT025316.2	ENSRNOT00000054685	ENSRNOG00000014705	Rbm20	-94.8
NONRATT025316.2	ENSRNOT00000002032	ENSRNOG00000001483	Wbscr16	-76.3
NONRATT025316.2	ENSRNOT00000021917	ENSRNOG00000016279	Zfp865	-82.9
NONRATT025316.2	ENSRNOT00000035865	ENSRNOG00000025815	Cdr2l	-82.5
NONRATT025316.2	ENSRNOT00000086042	ENSRNOG00000047905	Dus1l	-89.4
NONRATT025316.2	ENSRNOT00000015890	ENSRNOG00000011598	Slc15a1	-89.1
NONRATT025316.2	ENSRNOT00000021596	ENSRNOG00000015616	Rgs14	-82.6
NONRATT025316.2	ENSRNOT00000078439	ENSRNOG00000030688	Lrrc2	-87.2
NONRATT025316.2	ENSRNOT00000016468	ENSRNOG00000012184	Urgcp	-91.5
NONRATT025316.2	ENSRNOT00000004183	ENSRNOG00000003136	Fcrla	-77.5
NONRATT025316.2	ENSRNOT00000061249	ENSRNOG00000019232	RGD1311345	-94.1
NONRATT025316.2	ENSRNOT00000024976	ENSRNOG00000018476	Fuom	-94.1
NONRATT025316.2	ENSRNOT00000068360	ENSRNOG00000025269	Slc25a44	-94.9
NONRATT025316.2	ENSRNOT00000026588	ENSRNOG00000019630	Hacl1	-84.9
NONRATT025316.2	ENSRNOT00000034683	ENSRNOG00000025184	Prss35	-86.9
NONRATT025316.2	ENSRNOT00000067150	ENSRNOG00000020216	Gmpr2	-94.9
NONRATT025316.2	ENSRNOT00000083046	ENSRNOG00000054863	Usp4	-87.5
NONRATT025316.2	ENSRNOT00000025732	ENSRNOG00000039730	Orai3	-78.3
NONRATT025316.2	ENSRNOT00000054954	ENSRNOG00000036686	Anapc11	-94.9
NONRATT025316.2	ENSRNOT00000080574	ENSRNOG00000060325	Lefty2	-89.4
NONRATT025316.2	ENSRNOT00000001139	ENSRNOG00000000854	Ncr3	-89.4
NONRATT025316.2	ENSRNOT00000013286	ENSRNOG00000009951	Aif1l	-92.2
NONRATT025316.2	ENSRNOT00000055735	ENSRNOG00000016214	Agl	-82
NONRATT025316.2	ENSRNOT00000065791	ENSRNOG00000020420	Pklr	-87.5
NONRATT025316.2	ENSRNOT00000022962	ENSRNOG00000016897	Rlbp1	-75.7
NONRATT025316.2	ENSRNOT00000042539	ENSRNOG00000000503	Ppard	-94.9
NONRATT025316.2	ENSRNOT00000020499	ENSRNOG00000015249	RGD1562299	-91.9
NONRATT025316.2	ENSRNOT00000031026	ENSRNOG00000024410	Blvrb	-93
NONRATT025316.2	ENSRNOT00000021064	ENSRNOG00000015538	Abcd2	-91.5
NONRATT025316.2	ENSRNOT00000089265	ENSRNOG00000012878	Atp7b	-86.7
NONRATT025316.2	ENSRNOT00000017202	ENSRNOG00000012763	Cwf19l1	-94.8
NONRATT025316.2	ENSRNOT00000016679	ENSRNOG00000012475	Prr5	-87.5
NONRATT025316.2	ENSRNOT00000042606	ENSRNOG00000012594	Sugt1	-90.4
NONRATT025316.2	ENSRNOT00000084017	ENSRNOG00000058790	Fam120b	-90
NONRATT025316.2	ENSRNOT00000072653	ENSRNOG00000050059	AABR07035776.1	-86.5
NONRATT025316.2	ENSRNOT00000034998	ENSRNOG00000024743	L3mbtl2	-87.2
NONRATT025316.2	ENSRNOT00000013515	ENSRNOG00000010134	Acot2	-89.4
NONRATT025316.2	ENSRNOT00000000621	ENSRNOG00000000515	Mapk13	-94.1
NONRATT025316.2	ENSRNOT00000020182	ENSRNOG00000014940	Sfrp5	-84.9
NONRATT025316.2	ENSRNOT00000090790	ENSRNOG00000055716	Oscar	-85.3
NONRATT025316.2	ENSRNOT00000087327	ENSRNOG00000053675	Dhh	-93.8
NONRATT025316.2	ENSRNOT00000019556	ENSRNOG00000039528	Fam32a	-87.6
NONRATT025316.2	ENSRNOT00000043085	ENSRNOG00000003050	Tbc1d9b	-83.6
NONRATT025316.2	ENSRNOT00000091725	ENSRNOG00000026807	LOC362863	-92.2
NONRATT025316.2	ENSRNOT00000009904	ENSRNOG00000007310	Klrb1b	-94.9
NONRATT025316.2	ENSRNOT00000080191	ENSRNOG00000057245	Rbbp8nl	-94.1
NONRATT025316.2	ENSRNOT00000075201	ENSRNOG00000047295	Prr22	-94.8
NONRATT025316.2	ENSRNOT00000025241	ENSRNOG00000018590	Drg1	-84.8
NONRATT025316.2	ENSRNOT00000002779	ENSRNOG00000002032	Ifngr2	-91.5
NONRATT025316.2	ENSRNOT00000090407	ENSRNOG00000060436	Vti1b	-76.8
NONRATT025316.2	ENSRNOT00000025933	ENSRNOG00000019080	Hsd3b7	-89.4
NONRATT025316.2	ENSRNOT00000075570	ENSRNOG00000046036	Rn60_1_2787.1	-94.9
NONRATT025316.2	ENSRNOT00000080555	ENSRNOG00000020777	Zfp382	-94.1
NONRATT025316.2	ENSRNOT00000009122	ENSRNOG00000006399	Synj2bp	-87.2
NONRATT025316.2	ENSRNOT00000064828	ENSRNOG00000000082	Hltf	-80
NONRATT025316.2	ENSRNOT00000065677	ENSRNOG00000042944	Cenpw	-87
NONRATT025316.2	ENSRNOT00000083592	ENSRNOG00000060130	Ypel4	-94.9
NONRATT025316.2	ENSRNOT00000024122	ENSRNOG00000017904	Nol7	-85.6
NONRATT025316.2	ENSRNOT00000026165	ENSRNOG00000019317	Cplx3	-94.9
NONRATT025316.2	ENSRNOT00000066657	ENSRNOG00000013529	Stk4	-88.7
NONRATT025316.2	ENSRNOT00000079905	ENSRNOG00000023346	Rsg1	-93.8
NONRATT025316.2	ENSRNOT00000035245	ENSRNOG00000021560	Cass4	-94.9
NONRATT025316.2	ENSRNOT00000026540	ENSRNOG00000060429		-83.5
NONRATT025316.2	ENSRNOT00000023977	ENSRNOG00000017819	Cd14	-80.9
NONRATT025316.2	ENSRNOT00000026204	ENSRNOG00000019376	Zfp329	-88.3
NONRATT025316.2	ENSRNOT00000083144	ENSRNOG00000060052	AABR07063516.1	-89.4
NONRATT025316.2	ENSRNOT00000019127	ENSRNOG00000026295	Rbpjl	-83.3
NONRATT025316.2	ENSRNOT00000077803	ENSRNOG00000001073	RGD1563482	-89.1
NONRATT025316.2	ENSRNOT00000005426	ENSRNOG00000004091	Cwc25	-94.9
NONRATT025316.2	ENSRNOT00000026156	ENSRNOG00000019208	P2rx5	-87.5
NONRATT025316.2	ENSRNOT00000028187	ENSRNOG00000020777	Zfp382	-89.4
NONRATT025316.2	ENSRNOT00000076811	ENSRNOG00000012184	Urgcp	-94.1
NONRATT025316.2	ENSRNOT00000016327	ENSRNOG00000011909	Rasa2	-83.5
NONRATT025316.2	ENSRNOT00000021833	ENSRNOG00000016010	Mul1	-84
NONRATT025316.2	ENSRNOT00000002410	ENSRNOG00000001770	Ehhadh	-94.9
NONRATT025316.2	ENSRNOT00000085591	ENSRNOG00000037509	Chek2	-83.5
NONRATT025316.2	ENSRNOT00000037739	ENSRNOG00000027332	Gemin6	-87
NONRATT025316.2	ENSRNOT00000002987	ENSRNOG00000002194	Coq2	-89.4
NONRATT025316.2	ENSRNOT00000012940	ENSRNOG00000009506	Mre11a	-89.4
NONRATT025316.2	ENSRNOT00000000125	ENSRNOG00000000113	Elac1	-89.1
NONRATT025316.2	ENSRNOT00000005807	ENSRNOG00000004399	Dlx4	-94.1
NONRATT025316.2	ENSRNOT00000029184	ENSRNOG00000028548	Ccl9	-92.2
NONRATT025316.2	ENSRNOT00000083287	ENSRNOG00000014903	Zfyve27	-94.9
NONRATT025316.2	ENSRNOT00000026168	ENSRNOG00000019352	Emc6	-84.9
NONRATT025316.2	ENSRNOT00000072511	ENSRNOG00000049426	Mmab	-87
NONRATT025316.2	ENSRNOT00000006195	ENSRNOG00000004660	Fzd6	-88
NONRATT025316.2	ENSRNOT00000035047	ENSRNOG00000024543	RGD1561777	-89.4
NONRATT025316.2	ENSRNOT00000084642	ENSRNOG00000052142	Ahsa2	-84.9
NONRATT025316.2	ENSRNOT00000009202	ENSRNOG00000006893	Ppm1k	-89.4
NONRATT025316.2	ENSRNOT00000056355	ENSRNOG00000037275	Tlcd2	-86.8
NONRATT025316.2	ENSRNOT00000004350	ENSRNOG00000003247	Sde2	-87.6
NONRATT025316.2	ENSRNOT00000033017	ENSRNOG00000018999	Cdc14b	-86.8
NONRATT025316.2	ENSRNOT00000036999	ENSRNOG00000022283	Lhfpl5	-94.9
NONRATT025316.2	ENSRNOT00000049759	ENSRNOG00000015582	Me2	-89.1
NONRATT025316.2	ENSRNOT00000031904	ENSRNOG00000027434	Fitm2	-92.2
NONRATT025316.2	ENSRNOT00000033684	ENSRNOG00000027654	Appbp2	-87.2
NONRATT025316.2	ENSRNOT00000043518	ENSRNOG00000031896	Stt3a	-94.1
NONRATT025316.2	ENSRNOT00000085609	ENSRNOG00000054863	Usp4	-87.5
NONRATT025316.2	ENSRNOT00000009910	ENSRNOG00000007197	Nr1h4	-87.2
NONRATT025316.2	ENSRNOT00000076173	ENSRNOG00000026716	Rpl9	-94.1
NONRATT025316.2	ENSRNOT00000010508	ENSRNOG00000007981	Klhl23	-85.3
NONRATT025316.2	ENSRNOT00000013001	ENSRNOG00000009815	Pnma2	-94.9
NONRATT025316.2	ENSRNOT00000037039	ENSRNOG00000028493	Ppp1r15b	-88
NONRATT025316.2	ENSRNOT00000027241	ENSRNOG00000020088	Klhl26	-94.9
NONRATT025316.2	ENSRNOT00000087612	ENSRNOG00000058003	Spon1	-94.9
NONRATT025316.2	ENSRNOT00000030485	ENSRNOG00000027088	Ube2k	-92.7
NONRATT025316.2	ENSRNOT00000081146	ENSRNOG00000014555	Aox4	-90.4
NONRATT030260.2	ENSRNOT00000032634	ENSRNOG00000018740	Ugt1a8	-88.1
NONRATT030260.2	ENSRNOT00000077416	ENSRNOG00000018740	Ugt1a8	-88.1
NONRATT014513.2	ENSRNOT00000025686	ENSRNOG00000018954	Tsnaxip1	-82.4
NONRATT017614.2	ENSRNOT00000039203	ENSRNOG00000018680	Rpl17	-72.1
NONRATT017614.2	ENSRNOT00000023709	ENSRNOG00000017575	Gins2	-74.6
NONRATT017614.2	ENSRNOT00000024841	ENSRNOG00000018375	Eif2b3	-73.7
NONRATT017614.2	ENSRNOT00000080138	ENSRNOG00000049505	Nup43	-72.8
NONRATT017614.2	ENSRNOT00000091767	ENSRNOG00000058371	AABR07013154.2	-77.7
NONRATT017614.2	ENSRNOT00000089591	ENSRNOG00000011975	Crtc3	-75.3
NONRATT017614.2	ENSRNOT00000004150	ENSRNOG00000003111	Ovca2	-71.6
NONRATT017614.2	ENSRNOT00000085295	ENSRNOG00000059322	N4bp2l1	-68.7
NONRATT017614.2	ENSRNOT00000077152	ENSRNOG00000052051	Slc24a1	-73.6
NONRATT017614.2	ENSRNOT00000077942	ENSRNOG00000020730	LOC498369	-74.6
NONRATT017614.2	ENSRNOT00000036185	ENSRNOG00000026114	Ap5b1	-74.6
NONRATT017614.2	ENSRNOT00000076133	ENSRNOG00000021719	Slfn5	-74.6
NONRATT017614.2	ENSRNOT00000073809	ENSRNOG00000050205	Afmid	-72.1
NONRATT019945.2	ENSRNOT00000084283	ENSRNOG00000053247	Snx21	-98.3
ENSRNOT00000081572	ENSRNOT00000090623	ENSRNOG00000059133	AABR07020537.1	-101
ENSRNOT00000081572	ENSRNOT00000074702	ENSRNOG00000051410	AABR07043347.1	-78
ENSRNOT00000081572	ENSRNOT00000085199	ENSRNOG00000056033	AC111632.2	-98.3
ENSRNOT00000081572	ENSRNOT00000073584	ENSRNOG00000048334	AABR07057961.1	-67
ENSRNOT00000081572	ENSRNOT00000079990	ENSRNOG00000054519	AABR07053179.1	-100.1
ENSRNOT00000081572	ENSRNOT00000088899	ENSRNOG00000053259	AC109844.1	-84.6
ENSRNOT00000081572	ENSRNOT00000089083	ENSRNOG00000061317	AABR07011733.1	-73.1
ENSRNOT00000081572	ENSRNOT00000074210	ENSRNOG00000047294	AABR07043115.1	-101
ENSRNOT00000081572	ENSRNOT00000072715	ENSRNOG00000050382	AABR07043861.1	-69.4
ENSRNOT00000081572	ENSRNOT00000089627	ENSRNOG00000058277	AC080157.1	-78.8
ENSRNOT00000081572	ENSRNOT00000072844	ENSRNOG00000012088	LOC100364265	-78.8
ENSRNOT00000081572	ENSRNOT00000072808	ENSRNOG00000052690	AABR07042361.1	-76.4
ENSRNOT00000081572	ENSRNOT00000078674	ENSRNOG00000053969	AABR07008681.1	-67.8
ENSRNOT00000081572	ENSRNOT00000071111	ENSRNOG00000057979	AABR07011700.1	-80.9
ENSRNOT00000081572	ENSRNOT00000075481	ENSRNOG00000048904	AABR07004232.1	-95
ENSRNOT00000081572	ENSRNOT00000088725	ENSRNOG00000060618	AABR07027267.1	-78.4
ENSRNOT00000081572	ENSRNOT00000045719	ENSRNOG00000013624	Uevld	-92.9
ENSRNOT00000081572	ENSRNOT00000075106	ENSRNOG00000048948	AABR07067082.1	-76.4
ENSRNOT00000081572	ENSRNOT00000075010	ENSRNOG00000052559	AABR07037395.2	-76.4
ENSRNOT00000081572	ENSRNOT00000071999	ENSRNOG00000047877	AABR07064622.1	-76.4
ENSRNOT00000081572	ENSRNOT00000085508	ENSRNOG00000045597	AABR07018132.1	-80.9
ENSRNOT00000081572	ENSRNOT00000049830	ENSRNOG00000034030	AC130162.1	-73.8
ENSRNOT00000081572	ENSRNOT00000049046	ENSRNOG00000030580	LOC317588	-80.9
ENSRNOT00000081572	ENSRNOT00000084038	ENSRNOG00000054780	AC132740.1	-75.5
ENSRNOT00000081572	ENSRNOT00000083155	ENSRNOG00000056438	AC112624.1	-80.9
ENSRNOT00000081572	ENSRNOT00000083485	ENSRNOG00000060742	AABR07029809.1	-101
ENSRNOT00000081572	ENSRNOT00000073391	ENSRNOG00000049504	AABR07009221.1	-101
ENSRNOT00000081572	ENSRNOT00000072471	ENSRNOG00000050408	AABR07064590.1	-80.9
ENSRNOT00000081572	ENSRNOT00000091972	ENSRNOG00000058209	AABR07063893.1	-101
ENSRNOT00000081572	ENSRNOT00000071786	ENSRNOG00000048921	AABR07053613.1	-76.4
ENSRNOT00000081572	ENSRNOT00000046326	ENSRNOG00000031060	LOC498826	-73.8
ENSRNOT00000081572	ENSRNOT00000074379	ENSRNOG00000056748	AC229945.1	-86.8
ENSRNOT00000081572	ENSRNOT00000074962	ENSRNOG00000057430	AABR07039694.1	-80.9
ENSRNOT00000081572	ENSRNOT00000086690	ENSRNOG00000057798	AC102976.1	-94.5
ENSRNOT00000081572	ENSRNOT00000075269	ENSRNOG00000045583	AABR07002068.1	-78.8
ENSRNOT00000081572	ENSRNOT00000080073	ENSRNOG00000059691	AABR07033318.1	-101
ENSRNOT00000081572	ENSRNOT00000048074	ENSRNOG00000005861	Hsd11b1	-80.9
ENSRNOT00000081572	ENSRNOT00000072691	ENSRNOG00000048493	AABR07008293.2	-75.9
ENSRNOT00000081572	ENSRNOT00000073001	ENSRNOG00000050075	AABR07013425.1	-76.4
ENSRNOT00000081572	ENSRNOT00000045865	ENSRNOG00000049650	AABR07018556.1	-80.9
NONRATT025180.2	ENSRNOT00000083433	ENSRNOG00000053811	Arg2	-98.1
NONRATT017039.2	ENSRNOT00000079290	ENSRNOG00000020630	Il9r	-95.1
NONRATT014895.2	ENSRNOT00000090327	ENSRNOG00000015517	Zfp444	-65.4
NONRATT009046.2	ENSRNOT00000065593	ENSRNOG00000031993	Prim1	-75.5
NONRATT009046.2	ENSRNOT00000019703	ENSRNOG00000014493	Golga1	-93.7
NONRATT009046.2	ENSRNOT00000085812	ENSRNOG00000009172	Cpvl	-93.7
NONRATT009046.2	ENSRNOT00000056355	ENSRNOG00000037275	Tlcd2	-84.7
NONRATT009046.2	ENSRNOT00000015556	ENSRNOG00000011649	Epb42	-87.1
NONRATT009046.2	ENSRNOT00000025241	ENSRNOG00000018590	Drg1	-84.1
NONRATT009046.2	ENSRNOT00000020069	ENSRNOG00000014909	Sh2d5	-78.6
NONRATT009046.2	ENSRNOT00000030559	ENSRNOG00000028185	Tstd3	-75.4
NONRATT009046.2	ENSRNOT00000030485	ENSRNOG00000027088	Ube2k	-91.2
NONRATT009046.2	ENSRNOT00000090407	ENSRNOG00000060436	Vti1b	-76
NONRATT009046.2	ENSRNOT00000016327	ENSRNOG00000011909	Rasa2	-83.1
NONRATT009046.2	ENSRNOT00000009910	ENSRNOG00000007197	Nr1h4	-86.5
NONRATT009046.2	ENSRNOT00000016679	ENSRNOG00000012475	Prr5	-88
NONRATT009046.2	ENSRNOT00000005807	ENSRNOG00000004399	Dlx4	-94.6
NONRATT009046.2	ENSRNOT00000021596	ENSRNOG00000015616	Rgs14	-82.2
NONRATT009046.2	ENSRNOT00000089875	ENSRNOG00000005982	C1d	-94.6
NONRATT009046.2	ENSRNOT00000035047	ENSRNOG00000024543	RGD1561777	-89
NONRATT009046.2	ENSRNOT00000010238	ENSRNOG00000007508	Lrtm2	-88.3
NONRATT009046.2	ENSRNOT00000075344	ENSRNOG00000046002	LOC301124	-80.3
NONRATT009046.2	ENSRNOT00000013001	ENSRNOG00000009815	Pnma2	-93.7
NONRATT009046.2	ENSRNOT00000026540	ENSRNOG00000060429		-84.9
NONRATT009046.2	ENSRNOT00000035245	ENSRNOG00000021560	Cass4	-93.7
NONRATT009046.2	ENSRNOT00000043085	ENSRNOG00000003050	Tbc1d9b	-81.5
NONRATT009046.2	ENSRNOT00000024896	ENSRNOG00000018464	Lipt1	-80.9
NONRATT009046.2	ENSRNOT00000064828	ENSRNOG00000000082	Hltf	-80.5
NONRATT009046.2	ENSRNOT00000022962	ENSRNOG00000016897	Rlbp1	-75.4
NONRATT009046.2	ENSRNOT00000077803	ENSRNOG00000001073	RGD1563482	-88.3
NONRATT009046.2	ENSRNOT00000064015	ENSRNOG00000013855	Zmym1	-78.3
NONRATT009046.2	ENSRNOT00000010753	ENSRNOG00000007851	Psma3	-89.4
NONRATT009046.2	ENSRNOT00000075570	ENSRNOG00000046036	Rn60_1_2787.1	-93.7
NONRATT009046.2	ENSRNOT00000025544	ENSRNOG00000026940	Rgsl2h	-79.3
NONRATT009046.2	ENSRNOT00000086443	ENSRNOG00000048357	Phykpl	-91.5
NONRATT009046.2	ENSRNOT00000024366	ENSRNOG00000018102	Coa5	-79.6
NONRATT009046.2	ENSRNOT00000006195	ENSRNOG00000004660	Fzd6	-89.5
NONRATT009046.2	ENSRNOT00000023977	ENSRNOG00000017819	Cd14	-81.4
NONRATT009046.2	ENSRNOT00000044541	ENSRNOG00000030363	Psma8	-88.3
NONRATT009046.2	ENSRNOT00000048349	ENSRNOG00000007943	Gsdma	-80.6
NONRATT009046.2	ENSRNOT00000002028	ENSRNOG00000001480	Ncf1	-85.8
NONRATT009046.2	ENSRNOT00000029184	ENSRNOG00000028548	Ccl9	-91.8
NONRATT009046.2	ENSRNOT00000010508	ENSRNOG00000007981	Klhl23	-84.6
NONRATT009046.2	ENSRNOT00000083592	ENSRNOG00000060130	Ypel4	-93.7
NONRATT009046.2	ENSRNOT00000026832	ENSRNOG00000019825	Zdhhc24	-90.4
NONRATT009046.2	ENSRNOT00000084642	ENSRNOG00000052142	Ahsa2	-84.5
NONRATT009046.2	ENSRNOT00000089265	ENSRNOG00000012878	Atp7b	-85.9
NONRATT009046.2	ENSRNOT00000037039	ENSRNOG00000028493	Ppp1r15b	-87.2
NONRATT009046.2	ENSRNOT00000081539	ENSRNOG00000054581	Tmem101	-93.7
NONRATT009046.2	ENSRNOT00000079641	ENSRNOG00000014461	Galns	-86.6
NONRATT009046.2	ENSRNOT00000082524	ENSRNOG00000022877	Poldip3	-80.2
NONRATT009046.2	ENSRNOT00000012379	ENSRNOG00000009227	Aplnr	-83.3
NONRATT009046.2	ENSRNOT00000091284	ENSRNOG00000056703	Atrx	-80.1
NONRATT009046.2	ENSRNOT00000086042	ENSRNOG00000047905	Dus1l	-89
NONRATT009046.2	ENSRNOT00000090170	ENSRNOG00000029938	Pik3c2b	-89.2
NONRATT009046.2	ENSRNOT00000066103	ENSRNOG00000025324	Spire1	-93.7
NONRATT009046.2	ENSRNOT00000090790	ENSRNOG00000055716	Oscar	-84.6
NONRATT009046.2	ENSRNOT00000026165	ENSRNOG00000019317	Cplx3	-93.7
NONRATT009046.2	ENSRNOT00000085609	ENSRNOG00000054863	Usp4	-88
NONRATT009046.2	ENSRNOT00000025732	ENSRNOG00000039730	Orai3	-79.7
NONRATT009046.2	ENSRNOT00000045001	ENSRNOG00000030330	Pcdh11x	-80.9
NONRATT009046.2	ENSRNOT00000009709	ENSRNOG00000007333	Wdr20	-84.5
NONRATT009046.2	ENSRNOT00000031026	ENSRNOG00000024410	Blvrb	-90.7
NONRATT009046.2	ENSRNOT00000025342	ENSRNOG00000018752	Clcf1	-91.8
NONRATT009046.2	ENSRNOT00000013515	ENSRNOG00000010134	Acot2	-89
NONRATT009046.2	ENSRNOT00000004244	ENSRNOG00000003176	Mixl1	-91.2
NONRATT009046.2	ENSRNOT00000054954	ENSRNOG00000036686	Anapc11	-93.7
NONRATT009046.2	ENSRNOT00000002465	ENSRNOG00000001807	Sspn	-88.3
NONRATT009046.2	ENSRNOT00000042539	ENSRNOG00000000503	Ppard	-93.7
NONRATT009046.2	ENSRNOT00000091442	ENSRNOG00000022402	Luzp1	-82.1
NONRATT009046.2	ENSRNOT00000021917	ENSRNOG00000016279	Zfp865	-82.7
NONRATT009046.2	ENSRNOT00000080099	ENSRNOG00000056621	AC099384.2	-79.9
NONRATT009046.2	ENSRNOT00000024122	ENSRNOG00000017904	Nol7	-84.9
NONRATT009046.2	ENSRNOT00000015568	ENSRNOG00000011652	Sppl2a	-88.3
NONRATT009046.2	ENSRNOT00000042289	ENSRNOG00000027867	Rexo4	-85.5
NONRATT009046.2	ENSRNOT00000025933	ENSRNOG00000019080	Hsd3b7	-89
NONRATT009046.2	ENSRNOT00000090536	ENSRNOG00000015616	Rgs14	-82.2
NONRATT009046.2	ENSRNOT00000026156	ENSRNOG00000019208	P2rx5	-87.1
NONRATT009046.2	ENSRNOT00000086888	ENSRNOG00000003629	Nvl	-85.8
NONRATT009046.2	ENSRNOT00000004223	ENSRNOG00000003132	Mip	-84.9
NONRATT009046.2	ENSRNOT00000006018	ENSRNOG00000004337	Fam20b	-82.8
NONRATT009046.2	ENSRNOT00000002520	ENSRNOG00000001842	Mrps35	-91.1
NONRATT009046.2	ENSRNOT00000080191	ENSRNOG00000057245	Rbbp8nl	-93.7
NONRATT009046.2	ENSRNOT00000078439	ENSRNOG00000030688	Lrrc2	-86.5
NONRATT009046.2	ENSRNOT00000016993	ENSRNOG00000012564	RGD1564541	-90.8
NONRATT009046.2	ENSRNOT00000085591	ENSRNOG00000037509	Chek2	-89.3
NONRATT009046.2	ENSRNOT00000085488	ENSRNOG00000052167	Marveld2	-77.6
NONRATT009046.2	ENSRNOT00000081140	ENSRNOG00000052415	Gstt2	-93.7
NONRATT009046.2	ENSRNOT00000009122	ENSRNOG00000006399	Synj2bp	-86.5
NONRATT009046.2	ENSRNOT00000031904	ENSRNOG00000027434	Fitm2	-91.8
NONRATT009046.2	ENSRNOT00000009202	ENSRNOG00000006893	Ppm1k	-89.9
NONRATT009046.2	ENSRNOT00000010468	ENSRNOG00000007548	Polr3f	-79.9
NONRATT009046.2	ENSRNOT00000015890	ENSRNOG00000011598	Slc15a1	-88.5
NONRATT009046.2	ENSRNOT00000065677	ENSRNOG00000042944	Cenpw	-86.6
NONRATT009046.2	ENSRNOT00000022713	ENSRNOG00000022054	Paqr7	-84
NONRATT009046.2	ENSRNOT00000033017	ENSRNOG00000018999	Cdc14b	-86.4
NONRATT009046.2	ENSRNOT00000020182	ENSRNOG00000014940	Sfrp5	-84.5
NONRATT009046.2	ENSRNOT00000079325	ENSRNOG00000057092	Slfn3	-72.4
NONRATT009046.2	ENSRNOT00000081146	ENSRNOG00000014555	Aox4	-89.2
NONRATT009046.2	ENSRNOT00000013286	ENSRNOG00000009951	Aif1l	-91.8
NONRATT009046.2	ENSRNOT00000000621	ENSRNOG00000000515	Mapk13	-93.7
NONRATT009046.2	ENSRNOT00000027241	ENSRNOG00000020088	Klhl26	-94.6
NONRATT009046.2	ENSRNOT00000066657	ENSRNOG00000013529	Stk4	-88.3
NONRATT009046.2	ENSRNOT00000073220	ENSRNOG00000045795	Pddc1	-87.4
NONRATT009046.2	ENSRNOT00000087612	ENSRNOG00000058003	Spon1	-93.7
NONRATT009046.2	ENSRNOT00000080555	ENSRNOG00000020777	Zfp382	-93.7
NONRATT009046.2	ENSRNOT00000010730	ENSRNOG00000008118	Sync	-93.7
NONRATT009046.2	ENSRNOT00000016040	ENSRNOG00000011964	Abcd4	-91.1
NONRATT009046.2	ENSRNOT00000091725	ENSRNOG00000026807	LOC362863	-92.7
NONRATT009046.2	ENSRNOT00000076811	ENSRNOG00000012184	Urgcp	-93.7
NONRATT009046.2	ENSRNOT00000043737	ENSRNOG00000030688	Lrrc2	-86.5
NONRATT009046.2	ENSRNOT00000035865	ENSRNOG00000025815	Cdr2l	-83
NONRATT009046.2	ENSRNOT00000009430	ENSRNOG00000007018	Mapkbp1	-89
NONRATT009046.2	ENSRNOT00000017202	ENSRNOG00000012763	Cwf19l1	-93
NONRATT009046.2	ENSRNOT00000060937	ENSRNOG00000008368	Nanog	-80.7
NONRATT009046.2	ENSRNOT00000034683	ENSRNOG00000025184	Prss35	-85.8
NONRATT009046.2	ENSRNOT00000074626	ENSRNOG00000048043	F2r	-73
NONRATT009046.2	ENSRNOT00000055735	ENSRNOG00000016214	Agl	-81.2
NONRATT009046.2	ENSRNOT00000001139	ENSRNOG00000000854	Ncr3	-89
NONRATT009046.2	ENSRNOT00000072653	ENSRNOG00000050059	AABR07035776.1	-85.8
NONRATT009046.2	ENSRNOT00000061249	ENSRNOG00000019232	RGD1311345	-93.7
NONRATT009046.2	ENSRNOT00000011941	ENSRNOG00000008694	Miox	-78
NONRATT009046.2	ENSRNOT00000036999	ENSRNOG00000022283	Lhfpl5	-93.7
NONRATT009046.2	ENSRNOT00000026414	ENSRNOG00000019414	Tmem79	-94
NONRATT009046.2	ENSRNOT00000029039	ENSRNOG00000007758	LOC100362350	-83.3
NONRATT009046.2	ENSRNOT00000009904	ENSRNOG00000007310	Klrb1b	-93.7
NONRATT009046.2	ENSRNOT00000090987	ENSRNOG00000059474	Mob1a	-78.8
NONRATT009046.2	ENSRNOT00000002410	ENSRNOG00000001770	Ehhadh	-93.7
NONRATT009046.2	ENSRNOT00000019127	ENSRNOG00000026295	Rbpjl	-81.2
NONRATT009046.2	ENSRNOT00000083287	ENSRNOG00000014903	Zfyve27	-93.7
NONRATT009046.2	ENSRNOT00000060193	ENSRNOG00000039297	Mrpl52	-86.6
NONRATT009046.2	ENSRNOT00000074632	ENSRNOG00000048258	Cisd2	-84
NONRATT009046.2	ENSRNOT00000019991	ENSRNOG00000014712	Zfp39	-85.7
NONRATT009046.2	ENSRNOT00000020347	ENSRNOG00000015109	Ubxn8	-75.1
NONRATT009046.2	ENSRNOT00000015016	ENSRNOG00000011304	LOC100360397	-80.6
NONRATT009046.2	ENSRNOT00000019556	ENSRNOG00000039528	Fam32a	-86.7
NONRATT009046.2	ENSRNOT00000013514	ENSRNOG00000030538	Slco1b2	-81.4
NONRATT009046.2	ENSRNOT00000083046	ENSRNOG00000054863	Usp4	-88
NONRATT009046.2	ENSRNOT00000072511	ENSRNOG00000049426	Mmab	-85.8
NONRATT009046.2	ENSRNOT00000004183	ENSRNOG00000003136	Fcrla	-78.3
NONRATT009046.2	ENSRNOT00000002397	ENSRNOG00000001758	Tctex1d2	-75.4
NONRATT009046.2	ENSRNOT00000024054	ENSRNOG00000017693	Slc2a5	-85.1
NONRATT009046.2	ENSRNOT00000030462	ENSRNOG00000010345	Ssmem1	-91
NONRATT009046.2	ENSRNOT00000089625	ENSRNOG00000001527	Cd80	-83.6
NONRATT009046.2	ENSRNOT00000080574	ENSRNOG00000060325	Lefty2	-89
NONRATT009046.2	ENSRNOT00000023706	ENSRNOG00000017349	Tbc1d10b	-93.7
NONRATT009046.2	ENSRNOT00000007598	ENSRNOG00000005749	Foxred2	-90.2
NONRATT009046.2	ENSRNOT00000067150	ENSRNOG00000020216	Gmpr2	-93.7
NONRATT009046.2	ENSRNOT00000049759	ENSRNOG00000015582	Me2	-88.3
NONRATT009046.2	ENSRNOT00000010056	ENSRNOG00000007637	Acer2	-93.7
NONRATT009046.2	ENSRNOT00000021064	ENSRNOG00000015538	Abcd2	-89.4
NONRATT009046.2	ENSRNOT00000013409	ENSRNOG00000030538	Slco1b2	-81.4
NONRATT009046.2	ENSRNOT00000034998	ENSRNOG00000024743	L3mbtl2	-86.8
NONRATT009046.2	ENSRNOT00000026204	ENSRNOG00000019376	Zfp329	-87.9
NONRATT009046.2	ENSRNOT00000076439	ENSRNOG00000014909	Sh2d5	-78.6
NONRATT009046.2	ENSRNOT00000026168	ENSRNOG00000019352	Emc6	-85.4
NONRATT009046.2	ENSRNOT00000005715	ENSRNOG00000004263	Ints7	-88.3
NONRATT009046.2	ENSRNOT00000083144	ENSRNOG00000060052	AABR07063516.1	-89
NONRATT009046.2	ENSRNOT00000090385	ENSRNOG00000012629	Rab23	-76.1
NONRATT009046.2	ENSRNOT00000037739	ENSRNOG00000027332	Gemin6	-86.6
NONRATT009046.2	ENSRNOT00000078046	ENSRNOG00000057092	Slfn3	-72.4
NONRATT009046.2	ENSRNOT00000043518	ENSRNOG00000031896	Stt3a	-93.7
NONRATT009046.2	ENSRNOT00000042606	ENSRNOG00000012594	Sugt1	-88.3
NONRATT009046.2	ENSRNOT00000006186	ENSRNOG00000004532	Fam69b	-80.4
NONRATT009046.2	ENSRNOT00000065791	ENSRNOG00000020420	Pklr	-87.1
NONRATT009046.2	ENSRNOT00000023060	ENSRNOG00000017073	Car9	-73.3
NONRATT009046.2	ENSRNOT00000084017	ENSRNOG00000058790	Fam120b	-89.6
NONRATT009046.2	ENSRNOT00000024465	ENSRNOG00000017938	Btaf1	-86.3
NONRATT009046.2	ENSRNOT00000003823	ENSRNOG00000002843	Cxcl6	-91.3
NONRATT009046.2	ENSRNOT00000081977	ENSRNOG00000020229	Homer3	-80.1
NONRATT009046.2	ENSRNOT00000068360	ENSRNOG00000025269	Slc25a44	-93.7
NONRATT009046.2	ENSRNOT00000027753	ENSRNOG00000020463	Eif1ad	-75.6
NONRATT009046.2	ENSRNOT00000089016	ENSRNOG00000059463	Slc39a1	-84.2
NONRATT009046.2	ENSRNOT00000013463	ENSRNOG00000010034	Asah1	-89.3
NONRATT009046.2	ENSRNOT00000083148	ENSRNOG00000060464	Plxna3	-73.5
NONRATT009046.2	ENSRNOT00000016468	ENSRNOG00000012184	Urgcp	-89.4
NONRATT009046.2	ENSRNOT00000079905	ENSRNOG00000023346	Rsg1	-93
NONRATT009046.2	ENSRNOT00000076173	ENSRNOG00000026716	Rpl9	-93.7
NONRATT009046.2	ENSRNOT00000012940	ENSRNOG00000009506	Mre11a	-89
NONRATT009046.2	ENSRNOT00000021833	ENSRNOG00000016010	Mul1	-83.6
NONRATT009046.2	ENSRNOT00000014478	ENSRNOG00000009549	Fbxo3	-76.9
NONRATT009046.2	ENSRNOT00000013602	ENSRNOG00000010227	Gpatch2l	-82.1
NONRATT009046.2	ENSRNOT00000002779	ENSRNOG00000002032	Ifngr2	-89.4
NONRATT009046.2	ENSRNOT00000087327	ENSRNOG00000053675	Dhh	-93
NONRATT009046.2	ENSRNOT00000002987	ENSRNOG00000002194	Coq2	-89
NONRATT009046.2	ENSRNOT00000028187	ENSRNOG00000020777	Zfp382	-89
NONRATT009046.2	ENSRNOT00000054685	ENSRNOG00000014705	Rbm20	-93
NONRATT009046.2	ENSRNOT00000031549	ENSRNOG00000025808	Aars2	-85.6
NONRATT009046.2	ENSRNOT00000083109	ENSRNOG00000000503	Ppard	-93.7
NONRATT009046.2	ENSRNOT00000001923	ENSRNOG00000001419	Cldn15	-89.3
NONRATT009046.2	ENSRNOT00000075201	ENSRNOG00000047295	Prr22	-93
NONRATT009046.2	ENSRNOT00000011344	ENSRNOG00000008336	Tnfrsf11b	-85.5
NONRATT009046.2	ENSRNOT00000068666	ENSRNOG00000019196	Xpnpep3	-91.8
NONRATT009046.2	ENSRNOT00000004350	ENSRNOG00000003247	Sde2	-85.8
NONRATT009046.2	ENSRNOT00000077313	ENSRNOG00000052687	Megf8	-93
NONRATT009046.2	ENSRNOT00000086719	ENSRNOG00000007115	Crebl2	-89
NONRATT009046.2	ENSRNOT00000031044	ENSRNOG00000024266	Haus5	-93.7
NONRATT009046.2	ENSRNOT00000000125	ENSRNOG00000000113	Elac1	-88.3
NONRATT009046.2	ENSRNOT00000020499	ENSRNOG00000015249	RGD1562299	-91.2
NONRATT009046.2	ENSRNOT00000005426	ENSRNOG00000004091	Cwc25	-93.7
NONRATT009046.2	ENSRNOT00000002032	ENSRNOG00000001483	Wbscr16	-75.4
NONRATT009046.2	ENSRNOT00000073746	ENSRNOG00000046493	Pnpo	-83.2
NONRATT009046.2	ENSRNOT00000033684	ENSRNOG00000027654	Appbp2	-86.5
NONRATT009046.2	ENSRNOT00000008282	ENSRNOG00000006237	Gpr37l1	-93.7
NONRATT009046.2	ENSRNOT00000089138	ENSRNOG00000019232	RGD1311345	-93.7
NONRATT009046.2	ENSRNOT00000024976	ENSRNOG00000018476	Fuom	-93.7
NONRATT025091.2	ENSRNOT00000021064	ENSRNOG00000015538	Abcd2	-91.5
NONRATT025091.2	ENSRNOT00000019703	ENSRNOG00000014493	Golga1	-89.5
NONRATT025091.2	ENSRNOT00000024054	ENSRNOG00000017693	Slc2a5	-87.5
NONRATT025091.2	ENSRNOT00000023706	ENSRNOG00000017349	Tbc1d10b	-89.5
NONRATT025091.2	ENSRNOT00000076173	ENSRNOG00000026716	Rpl9	-91.5
NONRATT025091.2	ENSRNOT00000002028	ENSRNOG00000001480	Ncf1	-81.8
NONRATT025091.2	ENSRNOT00000009709	ENSRNOG00000007333	Wdr20	-82.3
NONRATT025091.2	ENSRNOT00000029039	ENSRNOG00000007758	LOC100362350	-79.3
NONRATT025091.2	ENSRNOT00000081539	ENSRNOG00000054581	Tmem101	-91.5
NONRATT025091.2	ENSRNOT00000010753	ENSRNOG00000007851	Psma3	-90.8
NONRATT025091.2	ENSRNOT00000024976	ENSRNOG00000018476	Fuom	-91.5
NONRATT025091.2	ENSRNOT00000008892	ENSRNOG00000006806	Setmar	-85.7
NONRATT025091.2	ENSRNOT00000014478	ENSRNOG00000009549	Fbxo3	-79.8
NONRATT025091.2	ENSRNOT00000086888	ENSRNOG00000003629	Nvl	-86.1
NONRATT025091.2	ENSRNOT00000031336	ENSRNOG00000021433	Arhgef39	-77.1
NONRATT025091.2	ENSRNOT00000077313	ENSRNOG00000052687	Megf8	-89.5
NONRATT025091.2	ENSRNOT00000009910	ENSRNOG00000007197	Nr1h4	-86.8
NONRATT025091.2	ENSRNOT00000080574	ENSRNOG00000060325	Lefty2	-86.8
NONRATT025091.2	ENSRNOT00000090987	ENSRNOG00000059474	Mob1a	-85.4
NONRATT025091.2	ENSRNOT00000025933	ENSRNOG00000019080	Hsd3b7	-86.8
NONRATT025091.2	ENSRNOT00000081977	ENSRNOG00000020229	Homer3	-75.6
NONRATT025091.2	ENSRNOT00000003823	ENSRNOG00000002843	Cxcl6	-89.5
NONRATT025091.2	ENSRNOT00000036999	ENSRNOG00000022283	Lhfpl5	-89.5
NONRATT025091.2	ENSRNOT00000073746	ENSRNOG00000046493	Pnpo	-84.4
NONRATT025091.2	ENSRNOT00000025241	ENSRNOG00000018590	Drg1	-86.1
NONRATT025091.2	ENSRNOT00000085488	ENSRNOG00000052167	Marveld2	-86.1
NONRATT025091.2	ENSRNOT00000086042	ENSRNOG00000047905	Dus1l	-86.8
NONRATT025091.2	ENSRNOT00000054685	ENSRNOG00000014705	Rbm20	-89.5
NONRATT025091.2	ENSRNOT00000016993	ENSRNOG00000012564	RGD1564541	-88.6
NONRATT025091.2	ENSRNOT00000016679	ENSRNOG00000012475	Prr5	-86.1
NONRATT025091.2	ENSRNOT00000027241	ENSRNOG00000020088	Klhl26	-89.5
NONRATT025091.2	ENSRNOT00000006195	ENSRNOG00000004660	Fzd6	-89.5
NONRATT025091.2	ENSRNOT00000067150	ENSRNOG00000020216	Gmpr2	-89.5
NONRATT025091.2	ENSRNOT00000001923	ENSRNOG00000001419	Cldn15	-87
NONRATT025091.2	ENSRNOT00000065791	ENSRNOG00000020420	Pklr	-86.1
NONRATT025091.2	ENSRNOT00000089875	ENSRNOG00000005982	C1d	-91.5
NONRATT025091.2	ENSRNOT00000031904	ENSRNOG00000027434	Fitm2	-89.6
NONRATT025091.2	ENSRNOT00000089625	ENSRNOG00000001527	Cd80	-81
NONRATT025091.2	ENSRNOT00000023060	ENSRNOG00000017073	Car9	-82.3
NONRATT025091.2	ENSRNOT00000083046	ENSRNOG00000054863	Usp4	-86.1
NONRATT025091.2	ENSRNOT00000033684	ENSRNOG00000027654	Appbp2	-84.5
NONRATT025091.2	ENSRNOT00000057989	ENSRNOG00000038102	Elmod3	-82.7
NONRATT025091.2	ENSRNOT00000024366	ENSRNOG00000018102	Coa5	-83
NONRATT025091.2	ENSRNOT00000089138	ENSRNOG00000019232	RGD1311345	-91.5
NONRATT025091.2	ENSRNOT00000090170	ENSRNOG00000029938	Pik3c2b	-91.5
NONRATT025091.2	ENSRNOT00000006186	ENSRNOG00000004532	Fam69b	-78.8
NONRATT025091.2	ENSRNOT00000023977	ENSRNOG00000017819	Cd14	-86.1
NONRATT025091.2	ENSRNOT00000013515	ENSRNOG00000010134	Acot2	-85
NONRATT025091.2	ENSRNOT00000064828	ENSRNOG00000000082	Hltf	-86.1
NONRATT025091.2	ENSRNOT00000077807	ENSRNOG00000009805	Wasf2	-83.7
NONRATT025091.2	ENSRNOT00000011344	ENSRNOG00000008336	Tnfrsf11b	-81
NONRATT025091.2	ENSRNOT00000034998	ENSRNOG00000024743	L3mbtl2	-84.8
NONRATT025091.2	ENSRNOT00000009202	ENSRNOG00000006893	Ppm1k	-86.8
NONRATT025091.2	ENSRNOT00000081146	ENSRNOG00000014555	Aox4	-86.4
NONRATT025091.2	ENSRNOT00000015568	ENSRNOG00000011652	Sppl2a	-84.3
NONRATT025091.2	ENSRNOT00000080191	ENSRNOG00000057245	Rbbp8nl	-91.5
NONRATT025091.2	ENSRNOT00000016040	ENSRNOG00000011964	Abcd4	-90.3
NONRATT025091.2	ENSRNOT00000031026	ENSRNOG00000024410	Blvrb	-89.5
NONRATT025091.2	ENSRNOT00000020182	ENSRNOG00000014940	Sfrp5	-86.1
NONRATT025091.2	ENSRNOT00000074626	ENSRNOG00000048043	F2r	-81.9
NONRATT025091.2	ENSRNOT00000026414	ENSRNOG00000019414	Tmem79	-87.6
NONRATT025091.2	ENSRNOT00000025732	ENSRNOG00000039730	Orai3	-85.2
NONRATT025091.2	ENSRNOT00000010468	ENSRNOG00000007548	Polr3f	-86.1
NONRATT025091.2	ENSRNOT00000035047	ENSRNOG00000024543	RGD1561777	-86.1
NONRATT025091.2	ENSRNOT00000029184	ENSRNOG00000028548	Ccl9	-89.6
NONRATT025091.2	ENSRNOT00000043737	ENSRNOG00000030688	Lrrc2	-83.4
NONRATT025091.2	ENSRNOT00000074632	ENSRNOG00000048258	Cisd2	-86.1
NONRATT025091.2	ENSRNOT00000030485	ENSRNOG00000027088	Ube2k	-89.5
NONRATT025091.2	ENSRNOT00000019127	ENSRNOG00000026295	Rbpjl	-83.2
NONRATT025091.2	ENSRNOT00000042289	ENSRNOG00000027867	Rexo4	-84.5
NONRATT025091.2	ENSRNOT00000086443	ENSRNOG00000048357	Phykpl	-87.5
NONRATT025091.2	ENSRNOT00000083148	ENSRNOG00000060464	Plxna3	-84.2
NONRATT025091.2	ENSRNOT00000010238	ENSRNOG00000007508	Lrtm2	-86.1
NONRATT025091.2	ENSRNOT00000013001	ENSRNOG00000009815	Pnma2	-88.9
NONRATT025091.2	ENSRNOT00000021917	ENSRNOG00000016279	Zfp865	-83.1
NONRATT025091.2	ENSRNOT00000002032	ENSRNOG00000001483	Wbscr16	-86.1
NONRATT025091.2	ENSRNOT00000017202	ENSRNOG00000012763	Cwf19l1	-89.5
NONRATT025091.2	ENSRNOT00000042606	ENSRNOG00000012594	Sugt1	-91.5
NONRATT025091.2	ENSRNOT00000001139	ENSRNOG00000000854	Ncr3	-86.8
NONRATT025091.2	ENSRNOT00000083592	ENSRNOG00000060130	Ypel4	-89.5
NONRATT025091.2	ENSRNOT00000075570	ENSRNOG00000046036	Rn60_1_2787.1	-88.9
NONRATT025091.2	ENSRNOT00000022962	ENSRNOG00000016897	Rlbp1	-86.1
NONRATT025091.2	ENSRNOT00000011941	ENSRNOG00000008694	Miox	-86.1
NONRATT025091.2	ENSRNOT00000031044	ENSRNOG00000024266	Haus5	-91.5
NONRATT025091.2	ENSRNOT00000035245	ENSRNOG00000021560	Cass4	-89.5
NONRATT025091.2	ENSRNOT00000007598	ENSRNOG00000005749	Foxred2	-84.5
NONRATT025091.2	ENSRNOT00000015890	ENSRNOG00000011598	Slc15a1	-84.3
NONRATT025091.2	ENSRNOT00000085812	ENSRNOG00000009172	Cpvl	-89.5
NONRATT025091.2	ENSRNOT00000025342	ENSRNOG00000018752	Clcf1	-87.6
NONRATT025091.2	ENSRNOT00000000621	ENSRNOG00000000515	Mapk13	-91.5
NONRATT025091.2	ENSRNOT00000026156	ENSRNOG00000019208	P2rx5	-84.9
NONRATT025091.2	ENSRNOT00000087327	ENSRNOG00000053675	Dhh	-91.5
NONRATT025091.2	ENSRNOT00000076439	ENSRNOG00000014909	Sh2d5	-86.1
NONRATT025091.2	ENSRNOT00000005426	ENSRNOG00000004091	Cwc25	-89.5
NONRATT025091.2	ENSRNOT00000031549	ENSRNOG00000025808	Aars2	-81.1
NONRATT025091.2	ENSRNOT00000024465	ENSRNOG00000017938	Btaf1	-82.3
NONRATT025091.2	ENSRNOT00000090385	ENSRNOG00000012629	Rab23	-82.7
NONRATT025091.2	ENSRNOT00000019556	ENSRNOG00000039528	Fam32a	-91.5
NONRATT025091.2	ENSRNOT00000072653	ENSRNOG00000050059	AABR07035776.1	-86.1
NONRATT025091.2	ENSRNOT00000090407	ENSRNOG00000060436	Vti1b	-86.1
NONRATT025091.2	ENSRNOT00000006018	ENSRNOG00000004337	Fam20b	-81.5
NONRATT025091.2	ENSRNOT00000026165	ENSRNOG00000019317	Cplx3	-89.5
NONRATT025091.2	ENSRNOT00000002410	ENSRNOG00000001770	Ehhadh	-88.9
NONRATT025091.2	ENSRNOT00000005807	ENSRNOG00000004399	Dlx4	-91.5
NONRATT025091.2	ENSRNOT00000019991	ENSRNOG00000014712	Zfp39	-83.7
NONRATT025091.2	ENSRNOT00000028187	ENSRNOG00000020777	Zfp382	-86.8
NONRATT025091.2	ENSRNOT00000021764	ENSRNOG00000015895	B4galt6	-77.4
NONRATT025091.2	ENSRNOT00000079325	ENSRNOG00000057092	Slfn3	-80.4
NONRATT025091.2	ENSRNOT00000004244	ENSRNOG00000003176	Mixl1	-89.5
NONRATT025091.2	ENSRNOT00000079905	ENSRNOG00000023346	Rsg1	-91.5
NONRATT025091.2	ENSRNOT00000010508	ENSRNOG00000007981	Klhl23	-86.1
NONRATT025091.2	ENSRNOT00000077803	ENSRNOG00000001073	RGD1563482	-86.8
NONRATT025091.2	ENSRNOT00000037681	ENSRNOG00000022975	Nfam1	-91.4
NONRATT025091.2	ENSRNOT00000010056	ENSRNOG00000007637	Acer2	-89.5
NONRATT025091.2	ENSRNOT00000024122	ENSRNOG00000017904	Nol7	-83.4
NONRATT025091.2	ENSRNOT00000000125	ENSRNOG00000000113	Elac1	-86.8
NONRATT025091.2	ENSRNOT00000021596	ENSRNOG00000015616	Rgs14	-86.8
NONRATT025091.2	ENSRNOT00000035865	ENSRNOG00000025815	Cdr2l	-84.9
NONRATT025091.2	ENSRNOT00000010730	ENSRNOG00000008118	Sync	-89.5
NONRATT025091.2	ENSRNOT00000020069	ENSRNOG00000014909	Sh2d5	-86.1
NONRATT025091.2	ENSRNOT00000072511	ENSRNOG00000049426	Mmab	-83.3
NONRATT025091.2	ENSRNOT00000009904	ENSRNOG00000007310	Klrb1b	-89.5
NONRATT025091.2	ENSRNOT00000065593	ENSRNOG00000031993	Prim1	-86.6
NONRATT025091.2	ENSRNOT00000081037	ENSRNOG00000061262	Huwe1	-79.3
NONRATT025091.2	ENSRNOT00000020499	ENSRNOG00000015249	RGD1562299	-91.5
NONRATT025091.2	ENSRNOT00000026832	ENSRNOG00000019825	Zdhhc24	-94.3
NONRATT025091.2	ENSRNOT00000084642	ENSRNOG00000052142	Ahsa2	-86.1
NONRATT025091.2	ENSRNOT00000002987	ENSRNOG00000002194	Coq2	-86.8
NONRATT025091.2	ENSRNOT00000049759	ENSRNOG00000015582	Me2	-85
NONRATT025091.2	ENSRNOT00000091442	ENSRNOG00000022402	Luzp1	-84.9
NONRATT025091.2	ENSRNOT00000084017	ENSRNOG00000058790	Fam120b	-85.6
NONRATT025091.2	ENSRNOT00000083109	ENSRNOG00000000503	Ppard	-89.1
NONRATT025091.2	ENSRNOT00000016468	ENSRNOG00000012184	Urgcp	-89.6
NONRATT025091.2	ENSRNOT00000023709	ENSRNOG00000017575	Gins2	-85.7
NONRATT025091.2	ENSRNOT00000043518	ENSRNOG00000031896	Stt3a	-91.5
NONRATT025091.2	ENSRNOT00000015016	ENSRNOG00000011304	LOC100360397	-84.2
NONRATT025091.2	ENSRNOT00000080555	ENSRNOG00000020777	Zfp382	-91.5
NONRATT025091.2	ENSRNOT00000013602	ENSRNOG00000010227	Gpatch2l	-86.1
NONRATT025091.2	ENSRNOT00000042539	ENSRNOG00000000503	Ppard	-89.1
NONRATT025091.2	ENSRNOT00000025544	ENSRNOG00000026940	Rgsl2h	-83.8
NONRATT025091.2	ENSRNOT00000002779	ENSRNOG00000002032	Ifngr2	-89.3
NONRATT025091.2	ENSRNOT00000083144	ENSRNOG00000060052	AABR07063516.1	-85
NONRATT025091.2	ENSRNOT00000037739	ENSRNOG00000027332	Gemin6	-86.1
NONRATT025091.2	ENSRNOT00000002520	ENSRNOG00000001842	Mrps35	-94.3
NONRATT025091.2	ENSRNOT00000044541	ENSRNOG00000030363	Psma8	-86.8
NONRATT025091.2	ENSRNOT00000086719	ENSRNOG00000007115	Crebl2	-86.8
NONRATT025091.2	ENSRNOT00000026204	ENSRNOG00000019376	Zfp329	-85.7
NONRATT025091.2	ENSRNOT00000043085	ENSRNOG00000003050	Tbc1d9b	-86.1
NONRATT025091.2	ENSRNOT00000085591	ENSRNOG00000037509	Chek2	-86.8
NONRATT025091.2	ENSRNOT00000015556	ENSRNOG00000011649	Epb42	-84.9
NONRATT025091.2	ENSRNOT00000085609	ENSRNOG00000054863	Usp4	-86.1
NONRATT025091.2	ENSRNOT00000080099	ENSRNOG00000056621	AC099384.2	-81.2
NONRATT025091.2	ENSRNOT00000076811	ENSRNOG00000012184	Urgcp	-89.7
NONRATT025091.2	ENSRNOT00000060193	ENSRNOG00000039297	Mrpl52	-86.1
NONRATT025091.2	ENSRNOT00000082524	ENSRNOG00000022877	Poldip3	-87.5
NONRATT025091.2	ENSRNOT00000065677	ENSRNOG00000042944	Cenpw	-84.6
NONRATT025091.2	ENSRNOT00000073220	ENSRNOG00000045795	Pddc1	-86.1
NONRATT025091.2	ENSRNOT00000016327	ENSRNOG00000011909	Rasa2	-86.1
NONRATT025091.2	ENSRNOT00000009122	ENSRNOG00000006399	Synj2bp	-86.8
NONRATT025091.2	ENSRNOT00000037039	ENSRNOG00000028493	Ppp1r15b	-86.1
NONRATT025091.2	ENSRNOT00000061249	ENSRNOG00000019232	RGD1311345	-91.5
NONRATT025091.2	ENSRNOT00000030462	ENSRNOG00000010345	Ssmem1	-87.4
NONRATT025091.2	ENSRNOT00000013463	ENSRNOG00000010034	Asah1	-80.5
NONRATT025091.2	ENSRNOT00000012940	ENSRNOG00000009506	Mre11a	-86.8
NONRATT025091.2	ENSRNOT00000005715	ENSRNOG00000004263	Ints7	-84.5
NONRATT025091.2	ENSRNOT00000091284	ENSRNOG00000056703	Atrx	-86.1
NONRATT025091.2	ENSRNOT00000068360	ENSRNOG00000025269	Slc25a44	-89.5
NONRATT025091.2	ENSRNOT00000078046	ENSRNOG00000057092	Slfn3	-80.4
NONRATT025091.2	ENSRNOT00000055735	ENSRNOG00000016214	Agl	-86.1
NONRATT025091.2	ENSRNOT00000013514	ENSRNOG00000030538	Slco1b2	-80.2
NONRATT025091.2	ENSRNOT00000089265	ENSRNOG00000012878	Atp7b	-86.8
NONRATT025091.2	ENSRNOT00000089016	ENSRNOG00000059463	Slc39a1	-86.1
NONRATT025091.2	ENSRNOT00000049722	ENSRNOG00000033665	Mrgprx2	-84.9
NONRATT025091.2	ENSRNOT00000009430	ENSRNOG00000007018	Mapkbp1	-86.8
NONRATT025091.2	ENSRNOT00000079641	ENSRNOG00000014461	Galns	-86.1
NONRATT025091.2	ENSRNOT00000008282	ENSRNOG00000006237	Gpr37l1	-89.5
NONRATT025091.2	ENSRNOT00000020347	ENSRNOG00000015109	Ubxn8	-78.9
NONRATT025091.2	ENSRNOT00000022713	ENSRNOG00000022054	Paqr7	-85.7
NONRATT025091.2	ENSRNOT00000060937	ENSRNOG00000008368	Nanog	-87.2
NONRATT025091.2	ENSRNOT00000081140	ENSRNOG00000052415	Gstt2	-91.5
NONRATT025091.2	ENSRNOT00000012379	ENSRNOG00000009227	Aplnr	-86.1
NONRATT025091.2	ENSRNOT00000066657	ENSRNOG00000013529	Stk4	-86.1
NONRATT025091.2	ENSRNOT00000068666	ENSRNOG00000019196	Xpnpep3	-87.6
NONRATT025091.2	ENSRNOT00000026588	ENSRNOG00000019630	Hacl1	-82.3
NONRATT025091.2	ENSRNOT00000002397	ENSRNOG00000001758	Tctex1d2	-86.1
NONRATT025091.2	ENSRNOT00000054954	ENSRNOG00000036686	Anapc11	-88.9
NONRATT025091.2	ENSRNOT00000013409	ENSRNOG00000030538	Slco1b2	-80.2
NONRATT025091.2	ENSRNOT00000064015	ENSRNOG00000013855	Zmym1	-86.1
NONRATT025091.2	ENSRNOT00000090536	ENSRNOG00000015616	Rgs14	-86.8
NONRATT025091.2	ENSRNOT00000034683	ENSRNOG00000025184	Prss35	-86.8
NONRATT025091.2	ENSRNOT00000087612	ENSRNOG00000058003	Spon1	-89.5
NONRATT025091.2	ENSRNOT00000004350	ENSRNOG00000003247	Sde2	-84.7
NONRATT025091.2	ENSRNOT00000024896	ENSRNOG00000018464	Lipt1	-80.4
NONRATT025091.2	ENSRNOT00000013286	ENSRNOG00000009951	Aif1l	-87.8
NONRATT025091.2	ENSRNOT00000075201	ENSRNOG00000047295	Prr22	-89.5
NONRATT025091.2	ENSRNOT00000026168	ENSRNOG00000019352	Emc6	-84.3
NONRATT025091.2	ENSRNOT00000056355	ENSRNOG00000037275	Tlcd2	-84.9
NONRATT025091.2	ENSRNOT00000090790	ENSRNOG00000055716	Oscar	-81.5
NONRATT025091.2	ENSRNOT00000088471	ENSRNOG00000011904	Trappc4	-77.1
NONRATT025091.2	ENSRNOT00000004183	ENSRNOG00000003136	Fcrla	-84.9
NONRATT025091.2	ENSRNOT00000027753	ENSRNOG00000020463	Eif1ad	-84.9
NONRATT025091.2	ENSRNOT00000026540	ENSRNOG00000060429		-81.9
NONRATT025091.2	ENSRNOT00000030559	ENSRNOG00000028185	Tstd3	-86.5
NONRATT025091.2	ENSRNOT00000083287	ENSRNOG00000014903	Zfyve27	-88.9
NONRATT025091.2	ENSRNOT00000045001	ENSRNOG00000030330	Pcdh11x	-76
NONRATT025091.2	ENSRNOT00000021833	ENSRNOG00000016010	Mul1	-81.4
NONRATT025091.2	ENSRNOT00000048349	ENSRNOG00000007943	Gsdma	-84.9
NONRATT025091.2	ENSRNOT00000002465	ENSRNOG00000001807	Sspn	-88.3
NONRATT025091.2	ENSRNOT00000066103	ENSRNOG00000025324	Spire1	-91.5
NONRATT025091.2	ENSRNOT00000075344	ENSRNOG00000046002	LOC301124	-86.1
NONRATT025091.2	ENSRNOT00000078439	ENSRNOG00000030688	Lrrc2	-83.4
NONRATT025091.2	ENSRNOT00000033017	ENSRNOG00000018999	Cdc14b	-89.6
NONRATT025091.2	ENSRNOT00000025362	ENSRNOG00000018770	Pmaip1	-90.3
NONRATT030312.2	ENSRNOT00000024440	ENSRNOG00000018051	Farp2	-96.2
NONRATT013748.2	ENSRNOT00000015210	ENSRNOG00000011321	Rftn1	-81.2
NONRATT013748.2	ENSRNOT00000065644	ENSRNOG00000009783	Camk2g	-79
NONRATT013748.2	ENSRNOT00000015021	ENSRNOG00000010798	Blk	-87.7
NONRATT013748.2	ENSRNOT00000006018	ENSRNOG00000004337	Fam20b	-79.7
NONRATT013748.2	ENSRNOT00000001600	ENSRNOG00000028814	Oasl2	-85.6
NONRATT013748.2	ENSRNOT00000025385	ENSRNOG00000018781	Map1s	-78
NONRATT013748.2	ENSRNOT00000028047	ENSRNOG00000020658	Aarsd1	-76.4
NONRATT013748.2	ENSRNOT00000084486	ENSRNOG00000059640	Ccl28	-70.3
NONRATT013748.2	ENSRNOT00000012864	ENSRNOG00000009599	Rwdd2a	-83.5
NONRATT013748.2	ENSRNOT00000078870	ENSRNOG00000029466	RGD1562608	-85.4
NONRATT013748.2	ENSRNOT00000077803	ENSRNOG00000001073	RGD1563482	-83.5
NONRATT013748.2	ENSRNOT00000091816	ENSRNOG00000016632	Dsg3	-88.1
NONRATT013748.2	ENSRNOT00000065462	ENSRNOG00000043204	Harbi1	-84.1
NONRATT013748.2	ENSRNOT00000029723	ENSRNOG00000042201	Efcab2	-83.5
NONRATT013748.2	ENSRNOT00000001498	ENSRNOG00000001134	Rfc5	-83.5
NONRATT013748.2	ENSRNOT00000026878	ENSRNOG00000019830	Hsd17b1	-92
NONRATT013748.2	ENSRNOT00000089625	ENSRNOG00000001527	Cd80	-75.5
NONRATT013748.2	ENSRNOT00000070807	ENSRNOG00000047080	Gng4	-88.1
NONRATT013748.2	ENSRNOT00000086082	ENSRNOG00000058940	Rab11fip1	-82.1
NONRATT013748.2	ENSRNOT00000054974	ENSRNOG00000036699	RGD1306926	-83.5
NONRATT013748.2	ENSRNOT00000016389	ENSRNOG00000012264	Alkbh1	-88.1
NONRATT013748.2	ENSRNOT00000025649	ENSRNOG00000018901	Rab14	-78.9
NONRATT013748.2	ENSRNOT00000080769	ENSRNOG00000005193	Pfas	-76.9
NONRATT013748.2	ENSRNOT00000017607	ENSRNOG00000013171	Grm2	-84.4
NONRATT013748.2	ENSRNOT00000090457	ENSRNOG00000058793	AABR07027511.1	-82.2
NONRATT013748.2	ENSRNOT00000015821	ENSRNOG00000011663	Rnf7	-83.5
NONRATT013748.2	ENSRNOT00000028174	ENSRNOG00000020751	Rdm1	-88.1
NONRATT013748.2	ENSRNOT00000026914	ENSRNOG00000019840	Mdp1	-73.4
NONRATT013748.2	ENSRNOT00000000443	ENSRNOG00000000394	Srgn	-83.5
NONRATT013748.2	ENSRNOT00000055735	ENSRNOG00000016214	Agl	-79
NONRATT013748.2	ENSRNOT00000033964	ENSRNOG00000023312	Lonrf2	-83
NONRATT013748.2	ENSRNOT00000089386	ENSRNOG00000051408	Magt1	-84.7
NONRATT013748.2	ENSRNOT00000044085	ENSRNOG00000025222	Pcid2	-88.1
NONRATT013748.2	ENSRNOT00000001238	ENSRNOG00000000934	Piwil1	-84.3
NONRATT013748.2	ENSRNOT00000031905	ENSRNOG00000024450	Poc1b	-72.3
NONRATT013748.2	ENSRNOT00000003128	ENSRNOG00000002254	Tmem33	-78.2
NONRATT013748.2	ENSRNOT00000026156	ENSRNOG00000019208	P2rx5	-79.7
NONRATT013748.2	ENSRNOT00000007544	ENSRNOG00000005618	Fmc1	-84.1
NONRATT013748.2	ENSRNOT00000002476	ENSRNOG00000001811	Fgfr1op2	-86.2
NONRATT013748.2	ENSRNOT00000079643	ENSRNOG00000052273	3110040N11Rik	-78
NONRATT013748.2	ENSRNOT00000006874	ENSRNOG00000005006	Ndufaf1	-88.8
NONRATT013748.2	ENSRNOT00000007202	ENSRNOG00000005378	Gna15	-72.3
NONRATT013748.2	ENSRNOT00000076133	ENSRNOG00000021719	Slfn5	-86.9
NONRATT013748.2	ENSRNOT00000079290	ENSRNOG00000020630	Il9r	-81.7
NONRATT013748.2	ENSRNOT00000019117	ENSRNOG00000014231	Pnoc	-80.4
NONRATT013748.2	ENSRNOT00000030749	ENSRNOG00000022502	Nsrp1	-80.4
NONRATT013748.2	ENSRNOT00000027785	ENSRNOG00000020444	Hcn3	-86.2
NONRATT013748.2	ENSRNOT00000007490	ENSRNOG00000005408	LOC100911674	-83.5
NONRATT013748.2	ENSRNOT00000087449	ENSRNOG00000000956	Rasl11a	-86.9
NONRATT013748.2	ENSRNOT00000068020	ENSRNOG00000008064	Naga	-84.7
NONRATT013748.2	ENSRNOT00000020407	ENSRNOG00000014584	Odf2	-79.7
NONRATT013748.2	ENSRNOT00000029572	ENSRNOG00000024960	Smco1	-77.8
NONRATT013748.2	ENSRNOT00000078383	ENSRNOG00000055408	Gcat	-88.1
NONRATT013748.2	ENSRNOT00000077165	ENSRNOG00000060320	Lin28a	-86.5
NONRATT013748.2	ENSRNOT00000023411	ENSRNOG00000017253	Ccdc107	-75.4
NONRATT013748.2	ENSRNOT00000001579	ENSRNOG00000001189	Sik1	-83.3
NONRATT013748.2	ENSRNOT00000001536	ENSRNOG00000001161	Gatc	-87.4
NONRATT013748.2	ENSRNOT00000013533	ENSRNOG00000010169	Atpaf1	-88.1
NONRATT013748.2	ENSRNOT00000009440	ENSRNOG00000006965	Aff4	-75.9
NONRATT013748.2	ENSRNOT00000086078	ENSRNOG00000022893	Rimbp2	-86.2
NONRATT013748.2	ENSRNOT00000014708	ENSRNOG00000012227	Stambp	-80.4
NONRATT013748.2	ENSRNOT00000031044	ENSRNOG00000024266	Haus5	-81.5
NONRATT013748.2	ENSRNOT00000019630	ENSRNOG00000014628	Pomk	-86.2
NONRATT013748.2	ENSRNOT00000001937	ENSRNOG00000001426	Prkrip1	-82.1
NONRATT013748.2	ENSRNOT00000083643	ENSRNOG00000051408	Magt1	-84.7
NONRATT013748.2	ENSRNOT00000078739	ENSRNOG00000051592	Sirt1	-81.7
NONRATT013748.2	ENSRNOT00000003441	ENSRNOG00000002549	Htr5b	-84.2
NONRATT013748.2	ENSRNOT00000076823	ENSRNOG00000024128	Aco2	-83.5
NONRATT013748.2	ENSRNOT00000080101	ENSRNOG00000016767	Ggps1	-80.4
NONRATT013748.2	ENSRNOT00000091063	ENSRNOG00000006523	Atl2	-83.5
NONRATT013748.2	ENSRNOT00000068334	ENSRNOG00000012734	Dcun1d1	-80.4
NONRATT013748.2	ENSRNOT00000071381	ENSRNOG00000047867	Klhdc8b	-78.8
NONRATT013748.2	ENSRNOT00000048407	ENSRNOG00000012818	Ksr1	-87
NONRATT013748.2	ENSRNOT00000017005	ENSRNOG00000011879	Nfat5	-74.6
NONRATT013748.2	ENSRNOT00000028591	ENSRNOG00000021056	Kcnj14	-80.4
NONRATT013748.2	ENSRNOT00000087355	ENSRNOG00000011962	Gin1	-79.5
NONRATT013748.2	ENSRNOT00000089660	ENSRNOG00000026061	RGD1566226	-83.5
NONRATT013748.2	ENSRNOT00000038994	ENSRNOG00000003622	Cybb	-83.5
NONRATT013748.2	ENSRNOT00000061123	ENSRNOG00000039829	Rpp14	-88.1
NONRATT013748.2	ENSRNOT00000005129	ENSRNOG00000003865	Tmigd1	-79.6
NONRATT013748.2	ENSRNOT00000047380	ENSRNOG00000032561	Slc52a2	-77.7
NONRATT013748.2	ENSRNOT00000009090	ENSRNOG00000025736	Tcf23	-86.5
NONRATT013748.2	ENSRNOT00000022097	ENSRNOG00000038365	Plekha2	-88.1
NONRATT013748.2	ENSRNOT00000054742	ENSRNOG00000024016	Cyp2c6v1	-83.5
NONRATT013748.2	ENSRNOT00000031018	ENSRNOG00000014935	Peo1	-86.7
NONRATT013748.2	ENSRNOT00000083110	ENSRNOG00000056011	AC139950.1	-88.1
NONRATT013748.2	ENSRNOT00000083899	ENSRNOG00000031916	Timeless	-81.9
NONRATT013748.2	ENSRNOT00000057716	ENSRNOG00000001339	Psmd9	-86.7
NONRATT013748.2	ENSRNOT00000038365	ENSRNOG00000025360	Exd1	-78.3
NONRATT013748.2	ENSRNOT00000045157	ENSRNOG00000031162	Ccl24	-86.7
NONRATT013748.2	ENSRNOT00000067796	ENSRNOG00000030572	Smc5	-77.1
NONRATT013748.2	ENSRNOT00000019247	ENSRNOG00000014214	Rpl27a	-79.9
NONRATT013748.2	ENSRNOT00000026817	ENSRNOG00000019817	Ddx28	-89.8
NONRATT013748.2	ENSRNOT00000084417	ENSRNOG00000014049	Riok1	-86.5
NONRATT013748.2	ENSRNOT00000083109	ENSRNOG00000000503	Ppard	-75.3
NONRATT013748.2	ENSRNOT00000087383	ENSRNOG00000004555	Sec14l4	-89.6
NONRATT013748.2	ENSRNOT00000027196	ENSRNOG00000020076	RGD1311783	-83
NONRATT013748.2	ENSRNOT00000002396	ENSRNOG00000001757	Tm4sf19	-78.3
NONRATT013748.2	ENSRNOT00000038207	ENSRNOG00000042289	Plcxd2	-78.4
NONRATT013748.2	ENSRNOT00000009404	ENSRNOG00000006462	Ero1l	-84.7
NONRATT013748.2	ENSRNOT00000083490	ENSRNOG00000009719	C2cd2l	-72.8
NONRATT013748.2	ENSRNOT00000038953	ENSRNOG00000021365	Ybey	-80
NONRATT013748.2	ENSRNOT00000004638	ENSRNOG00000003457	Ccdc64b	-81.3
NONRATT013748.2	ENSRNOT00000064932	ENSRNOG00000039859	Dnmt1	-86.7
NONRATT013748.2	ENSRNOT00000006374	ENSRNOG00000038720	Cdkl1	-88.1
NONRATT013748.2	ENSRNOT00000035017	ENSRNOG00000025406	Iqgap2	-79.9
NONRATT013748.2	ENSRNOT00000080651	ENSRNOG00000003261	Usp9x	-88.1
NONRATT013748.2	ENSRNOT00000051349	ENSRNOG00000018714	Arl5b	-79.7
NONRATT013748.2	ENSRNOT00000000246	ENSRNOG00000000230	Lmf1	-79
NONRATT013748.2	ENSRNOT00000082614	ENSRNOG00000059640	Ccl28	-70.3
NONRATT013748.2	ENSRNOT00000071269	ENSRNOG00000048606	Vma21	-82.2
NONRATT013748.2	ENSRNOT00000067558	ENSRNOG00000014218	Tmem25	-86.2
NONRATT013748.2	ENSRNOT00000084766	ENSRNOG00000051548	Lmod1	-75.7
NONRATT013748.2	ENSRNOT00000015767	ENSRNOG00000022268	Pnpla3	-88.1
NONRATT013748.2	ENSRNOT00000076585	ENSRNOG00000015787	P3h4	-80.8
NONRATT013748.2	ENSRNOT00000020174	ENSRNOG00000014801	Exog	-81.7
NONRATT013748.2	ENSRNOT00000085986	ENSRNOG00000007629	Sf3a3	-78.2
NONRATT013748.2	ENSRNOT00000076318	ENSRNOG00000014083	Iqsec3	-83.5
NONRATT013748.2	ENSRNOT00000008730	ENSRNOG00000006467	Eif2b2	-84.1
NONRATT013748.2	ENSRNOT00000073221	ENSRNOG00000045524	Slc39a3	-87.4
NONRATT013748.2	ENSRNOT00000009221	ENSRNOG00000007023	Galm	-89.6
NONRATT013748.2	ENSRNOT00000076137	ENSRNOG00000049137	Zfp35	-80.5
NONRATT013748.2	ENSRNOT00000081542	ENSRNOG00000059312	AABR07046231.1	-84.3
NONRATT013748.2	ENSRNOT00000031904	ENSRNOG00000027434	Fitm2	-83.8
NONRATT013748.2	ENSRNOT00000004403	ENSRNOG00000003298	Cd247	-78.7
NONRATT013748.2	ENSRNOT00000073596	ENSRNOG00000050828	Vkorc1	-84.8
NONRATT013748.2	ENSRNOT00000067694	ENSRNOG00000018144	Depdc5	-83.8
NONRATT013748.2	ENSRNOT00000022483	ENSRNOG00000016767	Ggps1	-80.4
NONRATT013748.2	ENSRNOT00000037444	ENSRNOG00000021555	Mis18a	-83
NONRATT013748.2	ENSRNOT00000026742	ENSRNOG00000019727	Dph3	-83.5
NONRATT013748.2	ENSRNOT00000076602	ENSRNOG00000024128	Aco2	-83.5
NONRATT013748.2	ENSRNOT00000008726	ENSRNOG00000006658	RGD1563015	-82.2
NONRATT013748.2	ENSRNOT00000082023	ENSRNOG00000021702	Mcmdc2	-76.5
NONRATT013748.2	ENSRNOT00000091702	ENSRNOG00000059801	Lima1	-87
NONRATT013748.2	ENSRNOT00000006307	ENSRNOG00000042427	Gskip	-87.4
NONRATT013748.2	ENSRNOT00000079826	ENSRNOG00000020374	Tmem8a	-80.1
NONRATT013748.2	ENSRNOT00000029223	ENSRNOG00000005153	LOC690422	-82
NONRATT013748.2	ENSRNOT00000064905	ENSRNOG00000026110	Scml4	-83.5
NONRATT013748.2	ENSRNOT00000030016	ENSRNOG00000028662	Zfp69	-78.4
NONRATT013748.2	ENSRNOT00000011747	ENSRNOG00000008619	Agtrap	-79.1
NONRATT013748.2	ENSRNOT00000027612	ENSRNOG00000020377	Cideb	-87
NONRATT013748.2	ENSRNOT00000082774	ENSRNOG00000049115	Ccr5	-83
NONRATT013748.2	ENSRNOT00000034266	ENSRNOG00000016825	Cd3eap	-81.3
NONRATT013748.2	ENSRNOT00000019204	ENSRNOG00000014331	Zfp717	-79.9
NONRATT013748.2	ENSRNOT00000011061	ENSRNOG00000008065	Wwc1	-86.9
NONRATT013748.2	ENSRNOT00000084707	ENSRNOG00000012037	Galnt7	-86.7
NONRATT013748.2	ENSRNOT00000022726	ENSRNOG00000016448	Eef2k	-80.3
NONRATT013748.2	ENSRNOT00000077646	ENSRNOG00000054751	Lmbrd2	-80.4
NONRATT013748.2	ENSRNOT00000091172	ENSRNOG00000059997	Brip1	-76.1
NONRATT013748.2	ENSRNOT00000025733	ENSRNOG00000019044	Adam30	-83.5
NONRATT013748.2	ENSRNOT00000087230	ENSRNOG00000026110	Scml4	-83.5
NONRATT013748.2	ENSRNOT00000029230	ENSRNOG00000026488	Gltpd2	-83.5
NONRATT013748.2	ENSRNOT00000018259	ENSRNOG00000013521	Dhfr	-77.4
NONRATT013748.2	ENSRNOT00000091323	ENSRNOG00000057141	AABR07035641.1	-78.7
NONRATT013748.2	ENSRNOT00000087197	ENSRNOG00000010169	Atpaf1	-88.1
NONRATT013748.2	ENSRNOT00000077378	ENSRNOG00000031162	Ccl24	-86.7
NONRATT013748.2	ENSRNOT00000020793	ENSRNOG00000015459	Heatr3	-80.4
NONRATT013748.2	ENSRNOT00000076178	ENSRNOG00000030118	Msn	-88.1
NONRATT013748.2	ENSRNOT00000022724	ENSRNOG00000016926	Plekhs1	-83
NONRATT013748.2	ENSRNOT00000027345	ENSRNOG00000020167	Reep5	-88.1
NONRATT013748.2	ENSRNOT00000026613	ENSRNOG00000019653	Csrnp2	-81.5
NONRATT013748.2	ENSRNOT00000016148	ENSRNOG00000011885	Rhpn2	-83.5
NONRATT013748.2	ENSRNOT00000013058	ENSRNOG00000009348	Nos3	-88.1
NONRATT013748.2	ENSRNOT00000012942	ENSRNOG00000009620	Cybrd1	-80.8
NONRATT013748.2	ENSRNOT00000039000	ENSRNOG00000022939	Gpkow	-82.2
NONRATT013748.2	ENSRNOT00000055158	ENSRNOG00000013713	LOC499240	-81.7
NONRATT013748.2	ENSRNOT00000085203	ENSRNOG00000003634	Zfp354a	-72.5
NONRATT013748.2	ENSRNOT00000082893	ENSRNOG00000052275	H2afv	-80.4
NONRATT013748.2	ENSRNOT00000058095	ENSRNOG00000038166	Ptgr2	-76.1
NONRATT013748.2	ENSRNOT00000009649	ENSRNOG00000007203	Psmc6	-88.1
NONRATT013748.2	ENSRNOT00000015452	ENSRNOG00000011560	Mtmr9	-88.1
NONRATT013748.2	ENSRNOT00000065771	ENSRNOG00000013610	Chrna5	-83.5
NONRATT013748.2	ENSRNOT00000091362	ENSRNOG00000000457	Tap1	-83.2
NONRATT013748.2	ENSRNOT00000012434	ENSRNOG00000009250	Pts	-80.8
NONRATT013748.2	ENSRNOT00000051239	ENSRNOG00000032703	Rasgrp3	-83.5
NONRATT013748.2	ENSRNOT00000024286	ENSRNOG00000018009	Rab8b	-87.4
NONRATT013748.2	ENSRNOT00000071779	ENSRNOG00000050089	RGD1563334	-79.6
NONRATT013748.2	ENSRNOT00000079678	ENSRNOG00000011573	Csad	-84.7
NONRATT013748.2	ENSRNOT00000042270	ENSRNOG00000001811	Fgfr1op2	-86.2
NONRATT013748.2	ENSRNOT00000031614	ENSRNOG00000028176	Elmod2	-81.7
NONRATT013748.2	ENSRNOT00000007588	ENSRNOG00000026702	Amica1	-73.3
NONRATT013748.2	ENSRNOT00000055103	ENSRNOG00000036760	Tmc5	-77.9
NONRATT013748.2	ENSRNOT00000091485	ENSRNOG00000026762	RT1-DOa	-84.3
NONRATT013748.2	ENSRNOT00000004150	ENSRNOG00000003111	Ovca2	-76.8
NONRATT013748.2	ENSRNOT00000085295	ENSRNOG00000059322	N4bp2l1	-82.5
NONRATT013748.2	ENSRNOT00000025970	ENSRNOG00000019165	Mrpl51	-82.7
NONRATT013748.2	ENSRNOT00000038550	ENSRNOG00000006925	Zfp786	-78.9
NONRATT013748.2	ENSRNOT00000081893	ENSRNOG00000013166	Wnt4	-83.5
NONRATT013748.2	ENSRNOT00000060149	ENSRNOG00000039278	Mcart1	-86.9
NONRATT013748.2	ENSRNOT00000061735	ENSRNOG00000018574	Qsox2	-83.5
NONRATT013748.2	ENSRNOT00000057175	ENSRNOG00000000308	Zbtb24	-83.5
NONRATT013748.2	ENSRNOT00000078341	ENSRNOG00000002265	Casr	-82.1
NONRATT013748.2	ENSRNOT00000007598	ENSRNOG00000005749	Foxred2	-86.2
NONRATT013748.2	ENSRNOT00000068418	ENSRNOG00000017181	Malt1	-79.9
NONRATT013748.2	ENSRNOT00000014470	ENSRNOG00000010680	Med12l	-84.1
NONRATT013748.2	ENSRNOT00000004223	ENSRNOG00000003132	Mip	-82.2
NONRATT013748.2	ENSRNOT00000017712	ENSRNOG00000013110	Nudt2	-79.5
NONRATT013748.2	ENSRNOT00000028781	ENSRNOG00000021200	Hfe2	-77.9
NONRATT013748.2	ENSRNOT00000070958	ENSRNOG00000003298	Cd247	-78.7
NONRATT013748.2	ENSRNOT00000026588	ENSRNOG00000019630	Hacl1	-74
NONRATT013748.2	ENSRNOT00000082233	ENSRNOG00000000841	Ddx39b	-85
NONRATT013748.2	ENSRNOT00000001570	ENSRNOG00000001187	Oasl	-85.8
NONRATT013748.2	ENSRNOT00000017340	ENSRNOG00000012965	Themis2	-83.7
NONRATT013748.2	ENSRNOT00000082035	ENSRNOG00000057127	RGD1562673	-83.4
NONRATT013748.2	ENSRNOT00000022452	ENSRNOG00000016683	Zfp668	-81.3
NONRATT013748.2	ENSRNOT00000022514	ENSRNOG00000042029	Efs	-87
NONRATT013748.2	ENSRNOT00000090387	ENSRNOG00000016767	Ggps1	-80.4
NONRATT013748.2	ENSRNOT00000089584	ENSRNOG00000020482	Nfatc4	-81.8
NONRATT013748.2	ENSRNOT00000077225	ENSRNOG00000014265	Tnfrsf19	-86.9
NONRATT013748.2	ENSRNOT00000074824	ENSRNOG00000049019	Tmem170a	-88.1
NONRATT013748.2	ENSRNOT00000078128	ENSRNOG00000058940	Rab11fip1	-82.1
NONRATT013748.2	ENSRNOT00000052408	ENSRNOG00000049104	LOC100911256	-83.2
NONRATT013748.2	ENSRNOT00000091712	ENSRNOG00000015150	Spg7	-88.1
NONRATT013748.2	ENSRNOT00000029879	ENSRNOG00000027091	Kctd18	-88.1
NONRATT013748.2	ENSRNOT00000058574	ENSRNOG00000038445	Rnf225	-81.9
NONRATT013748.2	ENSRNOT00000055822	ENSRNOG00000004320	Tgm4	-88.1
NONRATT013748.2	ENSRNOT00000019987	ENSRNOG00000036866	Acer3	-75
NONRATT013748.2	ENSRNOT00000001938	ENSRNOG00000001427	Orai2	-86.7
NONRATT013748.2	ENSRNOT00000024256	ENSRNOG00000017975	Dnajb13	-79.9
NONRATT013748.2	ENSRNOT00000026280	ENSRNOG00000019212	Tpp1	-88.1
NONRATT013748.2	ENSRNOT00000013356	ENSRNOG00000010071	RGD1560010	-86.7
NONRATT013748.2	ENSRNOT00000021271	ENSRNOG00000015746	Kcng4	-79.9
NONRATT031228.2	ENSRNOT00000017202	ENSRNOG00000012763	Cwf19l1	-81.7
NONRATT031228.2	ENSRNOT00000078439	ENSRNOG00000030688	Lrrc2	-86.7
NONRATT031228.2	ENSRNOT00000090407	ENSRNOG00000060436	Vti1b	-83.7
NONRATT031228.2	ENSRNOT00000057989	ENSRNOG00000038102	Elmod3	-80
NONRATT031228.2	ENSRNOT00000030559	ENSRNOG00000028185	Tstd3	-84.3
NONRATT031228.2	ENSRNOT00000054685	ENSRNOG00000014705	Rbm20	-82.3
NONRATT031228.2	ENSRNOT00000019703	ENSRNOG00000014493	Golga1	-81.7
NONRATT031228.2	ENSRNOT00000027753	ENSRNOG00000020463	Eif1ad	-82.5
NONRATT031228.2	ENSRNOT00000065593	ENSRNOG00000031993	Prim1	-84.2
NONRATT031228.2	ENSRNOT00000060193	ENSRNOG00000039297	Mrpl52	-83.7
NONRATT031228.2	ENSRNOT00000024054	ENSRNOG00000017693	Slc2a5	-85.1
NONRATT031228.2	ENSRNOT00000016040	ENSRNOG00000011964	Abcd4	-83.7
NONRATT031228.2	ENSRNOT00000010508	ENSRNOG00000007981	Klhl23	-87.4
NONRATT031228.2	ENSRNOT00000066103	ENSRNOG00000025324	Spire1	-83.7
NONRATT031228.2	ENSRNOT00000085591	ENSRNOG00000037509	Chek2	-85
NONRATT031228.2	ENSRNOT00000074632	ENSRNOG00000048258	Cisd2	-74.5
NONRATT031228.2	ENSRNOT00000083148	ENSRNOG00000060464	Plxna3	-81.8
NONRATT031228.2	ENSRNOT00000029184	ENSRNOG00000028548	Ccl9	-80.7
NONRATT031228.2	ENSRNOT00000002397	ENSRNOG00000001758	Tctex1d2	-83.7
NONRATT031228.2	ENSRNOT00000019127	ENSRNOG00000026295	Rbpjl	-74.8
NONRATT031228.2	ENSRNOT00000037039	ENSRNOG00000028493	Ppp1r15b	-83.7
NONRATT031228.2	ENSRNOT00000000125	ENSRNOG00000000113	Elac1	-85
NONRATT031228.2	ENSRNOT00000081146	ENSRNOG00000014555	Aox4	-81.7
NONRATT031228.2	ENSRNOT00000021764	ENSRNOG00000015895	B4galt6	-80.8
NONRATT031228.2	ENSRNOT00000025342	ENSRNOG00000018752	Clcf1	-82.2
NONRATT031228.2	ENSRNOT00000009709	ENSRNOG00000007333	Wdr20	-81.2
NONRATT031228.2	ENSRNOT00000086042	ENSRNOG00000047905	Dus1l	-85
NONRATT031228.2	ENSRNOT00000073746	ENSRNOG00000046493	Pnpo	-77.4
NONRATT031228.2	ENSRNOT00000009430	ENSRNOG00000007018	Mapkbp1	-85
NONRATT031228.2	ENSRNOT00000016327	ENSRNOG00000011909	Rasa2	-83.7
NONRATT031228.2	ENSRNOT00000034683	ENSRNOG00000025184	Prss35	-87.5
NONRATT031228.2	ENSRNOT00000042606	ENSRNOG00000012594	Sugt1	-83.7
NONRATT031228.2	ENSRNOT00000087612	ENSRNOG00000058003	Spon1	-81.7
NONRATT031228.2	ENSRNOT00000083592	ENSRNOG00000060130	Ypel4	-81.7
NONRATT031228.2	ENSRNOT00000002520	ENSRNOG00000001842	Mrps35	-81.3
NONRATT031228.2	ENSRNOT00000026588	ENSRNOG00000019630	Hacl1	-81.2
NONRATT031228.2	ENSRNOT00000075201	ENSRNOG00000047295	Prr22	-81.7
NONRATT031228.2	ENSRNOT00000026156	ENSRNOG00000019208	P2rx5	-79.2
NONRATT031228.2	ENSRNOT00000011941	ENSRNOG00000008694	Miox	-83.7
NONRATT031228.2	ENSRNOT00000005807	ENSRNOG00000004399	Dlx4	-79.2
NONRATT031228.2	ENSRNOT00000025933	ENSRNOG00000019080	Hsd3b7	-85
NONRATT031228.2	ENSRNOT00000014478	ENSRNOG00000009549	Fbxo3	-79.9
NONRATT031228.2	ENSRNOT00000064828	ENSRNOG00000000082	Hltf	-83.7
NONRATT031228.2	ENSRNOT00000033017	ENSRNOG00000018999	Cdc14b	-85
NONRATT031228.2	ENSRNOT00000021064	ENSRNOG00000015538	Abcd2	-78.6
NONRATT031228.2	ENSRNOT00000024976	ENSRNOG00000018476	Fuom	-83.7
NONRATT031228.2	ENSRNOT00000081140	ENSRNOG00000052415	Gstt2	-83.7
NONRATT031228.2	ENSRNOT00000031549	ENSRNOG00000025808	Aars2	-77.4
NONRATT031228.2	ENSRNOT00000066657	ENSRNOG00000013529	Stk4	-83.7
NONRATT031228.2	ENSRNOT00000027241	ENSRNOG00000020088	Klhl26	-81.7
NONRATT031228.2	ENSRNOT00000074626	ENSRNOG00000048043	F2r	-79.5
NONRATT031228.2	ENSRNOT00000016993	ENSRNOG00000012564	RGD1564541	-83.7
NONRATT031228.2	ENSRNOT00000004244	ENSRNOG00000003176	Mixl1	-82.3
NONRATT031228.2	ENSRNOT00000090170	ENSRNOG00000029938	Pik3c2b	-78.4
NONRATT031228.2	ENSRNOT00000024366	ENSRNOG00000018102	Coa5	-83.1
NONRATT031228.2	ENSRNOT00000013515	ENSRNOG00000010134	Acot2	-82.1
NONRATT031228.2	ENSRNOT00000048349	ENSRNOG00000007943	Gsdma	-85
NONRATT031228.2	ENSRNOT00000016468	ENSRNOG00000012184	Urgcp	-81.8
NONRATT031228.2	ENSRNOT00000084017	ENSRNOG00000058790	Fam120b	-83.3
NONRATT031228.2	ENSRNOT00000085609	ENSRNOG00000054863	Usp4	-85
NONRATT031228.2	ENSRNOT00000023060	ENSRNOG00000017073	Car9	-79.6
NONRATT031228.2	ENSRNOT00000090385	ENSRNOG00000012629	Rab23	-80.9
NONRATT031228.2	ENSRNOT00000020499	ENSRNOG00000015249	RGD1562299	-83.7
NONRATT031228.2	ENSRNOT00000089265	ENSRNOG00000012878	Atp7b	-85
NONRATT031228.2	ENSRNOT00000010468	ENSRNOG00000007548	Polr3f	-85
NONRATT031228.2	ENSRNOT00000065677	ENSRNOG00000042944	Cenpw	-82.8
NONRATT031228.2	ENSRNOT00000077313	ENSRNOG00000052687	Megf8	-81.7
NONRATT031228.2	ENSRNOT00000077803	ENSRNOG00000001073	RGD1563482	-85
NONRATT031228.2	ENSRNOT00000076811	ENSRNOG00000012184	Urgcp	-78.3
NONRATT031228.2	ENSRNOT00000022962	ENSRNOG00000016897	Rlbp1	-83.7
NONRATT031228.2	ENSRNOT00000083287	ENSRNOG00000014903	Zfyve27	-79.3
NONRATT031228.2	ENSRNOT00000013514	ENSRNOG00000030538	Slco1b2	-76.6
NONRATT031228.2	ENSRNOT00000043737	ENSRNOG00000030688	Lrrc2	-86.7
NONRATT031228.2	ENSRNOT00000013409	ENSRNOG00000030538	Slco1b2	-76.6
NONRATT031228.2	ENSRNOT00000089016	ENSRNOG00000059463	Slc39a1	-83.7
NONRATT031228.2	ENSRNOT00000001139	ENSRNOG00000000854	Ncr3	-85
NONRATT031228.2	ENSRNOT00000008282	ENSRNOG00000006237	Gpr37l1	-81.7
NONRATT031228.2	ENSRNOT00000043085	ENSRNOG00000003050	Tbc1d9b	-83.7
NONRATT031228.2	ENSRNOT00000015556	ENSRNOG00000011649	Epb42	-85
NONRATT031228.2	ENSRNOT00000090987	ENSRNOG00000059474	Mob1a	-83.7
NONRATT031228.2	ENSRNOT00000026165	ENSRNOG00000019317	Cplx3	-81.7
NONRATT031228.2	ENSRNOT00000061249	ENSRNOG00000019232	RGD1311345	-83.7
NONRATT031228.2	ENSRNOT00000021917	ENSRNOG00000016279	Zfp865	-76.7
NONRATT031228.2	ENSRNOT00000023706	ENSRNOG00000017349	Tbc1d10b	-82.3
NONRATT031228.2	ENSRNOT00000082524	ENSRNOG00000022877	Poldip3	-85
NONRATT031228.2	ENSRNOT00000009904	ENSRNOG00000007310	Klrb1b	-81.7
NONRATT031228.2	ENSRNOT00000000621	ENSRNOG00000000515	Mapk13	-80.8
NONRATT031228.2	ENSRNOT00000037739	ENSRNOG00000027332	Gemin6	-83.7
NONRATT031228.2	ENSRNOT00000087327	ENSRNOG00000053675	Dhh	-78.4
NONRATT031228.2	ENSRNOT00000002987	ENSRNOG00000002194	Coq2	-85
NONRATT031228.2	ENSRNOT00000008892	ENSRNOG00000006806	Setmar	-83.3
NONRATT031228.2	ENSRNOT00000015016	ENSRNOG00000011304	LOC100360397	-83.1
NONRATT031228.2	ENSRNOT00000083046	ENSRNOG00000054863	Usp4	-85
NONRATT031228.2	ENSRNOT00000060937	ENSRNOG00000008368	Nanog	-78.7
NONRATT031228.2	ENSRNOT00000083109	ENSRNOG00000000503	Ppard	-81.3
NONRATT031228.2	ENSRNOT00000031904	ENSRNOG00000027434	Fitm2	-85.8
NONRATT031228.2	ENSRNOT00000005715	ENSRNOG00000004263	Ints7	-82.3
NONRATT031228.2	ENSRNOT00000002028	ENSRNOG00000001480	Ncf1	-78
NONRATT031228.2	ENSRNOT00000079641	ENSRNOG00000014461	Galns	-83.7
NONRATT031228.2	ENSRNOT00000020069	ENSRNOG00000014909	Sh2d5	-83.7
NONRATT031228.2	ENSRNOT00000079905	ENSRNOG00000023346	Rsg1	-83.7
NONRATT031228.2	ENSRNOT00000025732	ENSRNOG00000039730	Orai3	-82.8
NONRATT031228.2	ENSRNOT00000085812	ENSRNOG00000009172	Cpvl	-81.7
NONRATT031228.2	ENSRNOT00000073220	ENSRNOG00000045795	Pddc1	-85
NONRATT031228.2	ENSRNOT00000049722	ENSRNOG00000033665	Mrgprx2	-86.7
NONRATT031228.2	ENSRNOT00000086719	ENSRNOG00000007115	Crebl2	-85
NONRATT031228.2	ENSRNOT00000078046	ENSRNOG00000057092	Slfn3	-78
NONRATT031228.2	ENSRNOT00000020182	ENSRNOG00000014940	Sfrp5	-83.7
NONRATT031228.2	ENSRNOT00000033684	ENSRNOG00000027654	Appbp2	-86.7
NONRATT031228.2	ENSRNOT00000034998	ENSRNOG00000024743	L3mbtl2	-82.9
NONRATT031228.2	ENSRNOT00000064015	ENSRNOG00000013855	Zmym1	-85
NONRATT031228.2	ENSRNOT00000028187	ENSRNOG00000020777	Zfp382	-85
NONRATT031228.2	ENSRNOT00000025241	ENSRNOG00000018590	Drg1	-85
NONRATT031228.2	ENSRNOT00000055735	ENSRNOG00000016214	Agl	-83.7
NONRATT031228.2	ENSRNOT00000016679	ENSRNOG00000012475	Prr5	-85
NONRATT031228.2	ENSRNOT00000013463	ENSRNOG00000010034	Asah1	-78.7
NONRATT031228.2	ENSRNOT00000065791	ENSRNOG00000020420	Pklr	-85
NONRATT031228.2	ENSRNOT00000011344	ENSRNOG00000008336	Tnfrsf11b	-78.6
NONRATT031228.2	ENSRNOT00000084642	ENSRNOG00000052142	Ahsa2	-83.7
NONRATT031228.2	ENSRNOT00000079325	ENSRNOG00000057092	Slfn3	-78
NONRATT031228.2	ENSRNOT00000009910	ENSRNOG00000007197	Nr1h4	-87.4
NONRATT031228.2	ENSRNOT00000068666	ENSRNOG00000019196	Xpnpep3	-81.7
NONRATT031228.2	ENSRNOT00000006018	ENSRNOG00000004337	Fam20b	-82.1
NONRATT031228.2	ENSRNOT00000091284	ENSRNOG00000056703	Atrx	-87.7
NONRATT031228.2	ENSRNOT00000002779	ENSRNOG00000002032	Ifngr2	-81.4
NONRATT031228.2	ENSRNOT00000010238	ENSRNOG00000007508	Lrtm2	-83.7
NONRATT031228.2	ENSRNOT00000091442	ENSRNOG00000022402	Luzp1	-83.1
NONRATT031228.2	ENSRNOT00000090790	ENSRNOG00000055716	Oscar	-86.7
NONRATT031228.2	ENSRNOT00000076173	ENSRNOG00000026716	Rpl9	-78.4
NONRATT031228.2	ENSRNOT00000035047	ENSRNOG00000024543	RGD1561777	-83.9
NONRATT031228.2	ENSRNOT00000072653	ENSRNOG00000050059	AABR07035776.1	-79.6
NONRATT031228.2	ENSRNOT00000068360	ENSRNOG00000025269	Slc25a44	-82.2
NONRATT031228.2	ENSRNOT00000009202	ENSRNOG00000006893	Ppm1k	-85
NONRATT031228.2	ENSRNOT00000012379	ENSRNOG00000009227	Aplnr	-83.7
NONRATT031228.2	ENSRNOT00000035865	ENSRNOG00000025815	Cdr2l	-83.1
NONRATT031228.2	ENSRNOT00000083144	ENSRNOG00000060052	AABR07063516.1	-83.1
NONRATT031228.2	ENSRNOT00000026168	ENSRNOG00000019352	Emc6	-83.6
NONRATT031228.2	ENSRNOT00000075344	ENSRNOG00000046002	LOC301124	-88.3
NONRATT031228.2	ENSRNOT00000010730	ENSRNOG00000008118	Sync	-81.7
NONRATT031228.2	ENSRNOT00000089138	ENSRNOG00000019232	RGD1311345	-83.7
NONRATT031228.2	ENSRNOT00000030485	ENSRNOG00000027088	Ube2k	-78.8
NONRATT031228.2	ENSRNOT00000024465	ENSRNOG00000017938	Btaf1	-80.1
NONRATT031228.2	ENSRNOT00000013602	ENSRNOG00000010227	Gpatch2l	-85.4
NONRATT031228.2	ENSRNOT00000067150	ENSRNOG00000020216	Gmpr2	-81.7
NONRATT031228.2	ENSRNOT00000015568	ENSRNOG00000011652	Sppl2a	-78.3
NONRATT031228.2	ENSRNOT00000001923	ENSRNOG00000001419	Cldn15	-82.5
NONRATT031228.2	ENSRNOT00000031026	ENSRNOG00000024410	Blvrb	-81.7
NONRATT031228.2	ENSRNOT00000042289	ENSRNOG00000027867	Rexo4	-82.1
NONRATT031228.2	ENSRNOT00000054954	ENSRNOG00000036686	Anapc11	-79.8
NONRATT031228.2	ENSRNOT00000009122	ENSRNOG00000006399	Synj2bp	-87.4
NONRATT031228.2	ENSRNOT00000026540	ENSRNOG00000060429		-79.7
NONRATT031228.2	ENSRNOT00000021833	ENSRNOG00000016010	Mul1	-82.2
NONRATT031228.2	ENSRNOT00000022713	ENSRNOG00000022054	Paqr7	-83.3
NONRATT031228.2	ENSRNOT00000023709	ENSRNOG00000017575	Gins2	-83.3
NONRATT031228.2	ENSRNOT00000042539	ENSRNOG00000000503	Ppard	-81.3
NONRATT031228.2	ENSRNOT00000021596	ENSRNOG00000015616	Rgs14	-85
NONRATT031228.2	ENSRNOT00000005426	ENSRNOG00000004091	Cwc25	-80.1
NONRATT031228.2	ENSRNOT00000036999	ENSRNOG00000022283	Lhfpl5	-82.2
NONRATT031228.2	ENSRNOT00000043518	ENSRNOG00000031896	Stt3a	-83.7
NONRATT031228.2	ENSRNOT00000012940	ENSRNOG00000009506	Mre11a	-85
NONRATT031228.2	ENSRNOT00000086888	ENSRNOG00000003629	Nvl	-86.7
NONRATT031228.2	ENSRNOT00000026204	ENSRNOG00000019376	Zfp329	-81.4
NONRATT031228.2	ENSRNOT00000019556	ENSRNOG00000039528	Fam32a	-81.1
NONRATT031228.2	ENSRNOT00000049759	ENSRNOG00000015582	Me2	-82.9
NONRATT031228.2	ENSRNOT00000044541	ENSRNOG00000030363	Psma8	-85
NONRATT031228.2	ENSRNOT00000023977	ENSRNOG00000017819	Cd14	-83.7
NONRATT031228.2	ENSRNOT00000007598	ENSRNOG00000005749	Foxred2	-83.5
NONRATT031228.2	ENSRNOT00000081037	ENSRNOG00000061262	Huwe1	-79.9
NONRATT031228.2	ENSRNOT00000080099	ENSRNOG00000056621	AC099384.2	-78.9
NONRATT031228.2	ENSRNOT00000024122	ENSRNOG00000017904	Nol7	-77.3
NONRATT031228.2	ENSRNOT00000080191	ENSRNOG00000057245	Rbbp8nl	-83.7
NONRATT031228.2	ENSRNOT00000031044	ENSRNOG00000024266	Haus5	-83.7
NONRATT031228.2	ENSRNOT00000056355	ENSRNOG00000037275	Tlcd2	-83.1
NONRATT031228.2	ENSRNOT00000080555	ENSRNOG00000020777	Zfp382	-83.7
NONRATT031228.2	ENSRNOT00000002032	ENSRNOG00000001483	Wbscr16	-83.7
NONRATT031228.2	ENSRNOT00000020347	ENSRNOG00000015109	Ubxn8	-81.8
NONRATT031228.2	ENSRNOT00000010056	ENSRNOG00000007637	Acer2	-81.7
NONRATT031228.2	ENSRNOT00000035245	ENSRNOG00000021560	Cass4	-81.7
NONRATT031228.2	ENSRNOT00000085488	ENSRNOG00000052167	Marveld2	-83.7
NONRATT031228.2	ENSRNOT00000090536	ENSRNOG00000015616	Rgs14	-85
NONRATT031228.2	ENSRNOT00000080574	ENSRNOG00000060325	Lefty2	-85
NONRATT031228.2	ENSRNOT00000013286	ENSRNOG00000009951	Aif1l	-75.5
NONRATT031228.2	ENSRNOT00000089875	ENSRNOG00000005982	C1d	-82.1
NONRATT031228.2	ENSRNOT00000045001	ENSRNOG00000030330	Pcdh11x	-73.6
NONRATT031228.2	ENSRNOT00000076439	ENSRNOG00000014909	Sh2d5	-83.7
NONRATT031228.2	ENSRNOT00000081539	ENSRNOG00000054581	Tmem101	-79.1
NONRATT031228.2	ENSRNOT00000010753	ENSRNOG00000007851	Psma3	-77.7
NONRATT031228.2	ENSRNOT00000024896	ENSRNOG00000018464	Lipt1	-78
NONRATT026674.2	ENSRNOT00000021278	ENSRNOG00000045838	Hps1	-83.7
NONRATT026674.2	ENSRNOT00000028388	ENSRNOG00000036794	Asb16	-82.8
NONRATT026674.2	ENSRNOT00000021797	ENSRNOG00000016087	Hars2	-78
NONRATT026674.2	ENSRNOT00000077942	ENSRNOG00000020730	LOC498369	-82.8
NONRATT026674.2	ENSRNOT00000087622	ENSRNOG00000009193	Lctl	-80.8
NONRATT026674.2	ENSRNOT00000028811	ENSRNOG00000021216	Pex11b	-80.8
NONRATT026674.2	ENSRNOT00000067892	ENSRNOG00000011268	Chd5	-76.8
NONRATT026674.2	ENSRNOT00000024706	ENSRNOG00000018286	Chrna1	-80.6
NONRATT026674.2	ENSRNOT00000081037	ENSRNOG00000061262	Huwe1	-78.2
NONRATT026674.2	ENSRNOT00000011915	ENSRNOG00000008725	Slc37a3	-83.9
NONRATT026674.2	ENSRNOT00000083491	ENSRNOG00000005981	Nt5c3a	-83.6
NONRATT026674.2	ENSRNOT00000091712	ENSRNOG00000015150	Spg7	-78.5
NONRATT026674.2	ENSRNOT00000003797	ENSRNOG00000002820	LOC24906	-78.5
NONRATT026674.2	ENSRNOT00000057830	ENSRNOG00000038012	Commd6	-74.5
NONRATT026674.2	ENSRNOT00000079473	ENSRNOG00000020557	Ryr1	-82.5
NONRATT026674.2	ENSRNOT00000021271	ENSRNOG00000015746	Kcng4	-83.9
NONRATT026674.2	ENSRNOT00000011855	ENSRNOG00000008490	Cwc15	-80.8
NONRATT026674.2	ENSRNOT00000066601	ENSRNOG00000043374	RGD1566099	-83.2
NONRATT026674.2	ENSRNOT00000047657	ENSRNOG00000042524	Milr1	-78.4
NONRATT026674.2	ENSRNOT00000014560	ENSRNOG00000010602	Birc2	-80.4
NONRATT026674.2	ENSRNOT00000087931	ENSRNOG00000020777	Zfp382	-69.3
NONRATT026674.2	ENSRNOT00000051951	ENSRNOG00000009582	Rpe65	-72.8
NONRATT026674.2	ENSRNOT00000036876	ENSRNOG00000016123	Rnf144b	-82.5
NONRATT026674.2	ENSRNOT00000091472	ENSRNOG00000028594	Ifnar1	-73.5
NONRATT026674.2	ENSRNOT00000024420	ENSRNOG00000018106	Neu3	-80.8
NONRATT026674.2	ENSRNOT00000023226	ENSRNOG00000017237	Lama1	-80.8
NONRATT026674.2	ENSRNOT00000024362	ENSRNOG00000018044	Phyh	-80.8
NONRATT026674.2	ENSRNOT00000085295	ENSRNOG00000059322	N4bp2l1	-78.1
NONRATT026674.2	ENSRNOT00000017264	ENSRNOG00000012866	Nek8	-78.5
NONRATT026674.2	ENSRNOT00000079905	ENSRNOG00000023346	Rsg1	-73.7
NONRATT026674.2	ENSRNOT00000031549	ENSRNOG00000025808	Aars2	-82
NONRATT026674.2	ENSRNOT00000036972	ENSRNOG00000042353	Mlkl	-83.9
NONRATT026674.2	ENSRNOT00000060284	ENSRNOG00000042496	Cyp4f17	-80.8
NONRATT026674.2	ENSRNOT00000018497	ENSRNOG00000013744	Akip1	-74.7
NONRATT026674.2	ENSRNOT00000032802	ENSRNOG00000024569	Gimap9	-82.8
NONRATT026674.2	ENSRNOT00000089988	ENSRNOG00000001821	Adipoq	-80.8
NONRATT026674.2	ENSRNOT00000032723	ENSRNOG00000021847	Ska3	-70.8
NONRATT026674.2	ENSRNOT00000030244	ENSRNOG00000021475	Ldah	-80.5
NONRATT026674.2	ENSRNOT00000090671	ENSRNOG00000057227	AABR07036732.1	-80.4
NONRATT026674.2	ENSRNOT00000081934	ENSRNOG00000004921	Nusap1	-80.5
NONRATT026674.2	ENSRNOT00000000607	ENSRNOG00000000506	Tead3	-80.8
NONRATT026674.2	ENSRNOT00000036999	ENSRNOG00000022283	Lhfpl5	-82.8
NONRATT026674.2	ENSRNOT00000038612	ENSRNOG00000024128	Aco2	-82.8
NONRATT026674.2	ENSRNOT00000018221	ENSRNOG00000013439	Cpn1	-83.9
NONRATT026674.2	ENSRNOT00000050891	ENSRNOG00000021156	Vegfb	-82.8
NONRATT026674.2	ENSRNOT00000027369	ENSRNOG00000020086	Aar2	-76.5
NONRATT026674.2	ENSRNOT00000083643	ENSRNOG00000051408	Magt1	-83.6
NONRATT026674.2	ENSRNOT00000059468	ENSRNOG00000021345	Timd2	-82.8
NONRATT026674.2	ENSRNOT00000057372	ENSRNOG00000037795	Ldlrad1	-78.4
NONRATT026674.2	ENSRNOT00000029985	ENSRNOG00000028594	Ifnar1	-73.5
NONRATT026674.2	ENSRNOT00000027785	ENSRNOG00000020444	Hcn3	-79.1
NONRATT026674.2	ENSRNOT00000048349	ENSRNOG00000007943	Gsdma	-83.9
NONRATT026674.2	ENSRNOT00000079949	ENSRNOG00000033426	Cdc37	-83.9
NONRATT026674.2	ENSRNOT00000068168	ENSRNOG00000018097	Emc1	-80.8
NONRATT026674.2	ENSRNOT00000023187	ENSRNOG00000017130	Rhd	-80.8
NONRATT026674.2	ENSRNOT00000001639	ENSRNOG00000001224	Itgb2	-82.7
NONRATT026674.2	ENSRNOT00000044413	ENSRNOG00000034134	Cpm	-83.9
NONRATT026674.2	ENSRNOT00000073809	ENSRNOG00000050205	Afmid	-82.8
NONRATT026674.2	ENSRNOT00000030290	ENSRNOG00000027087	Tmem186	-83.9
NONRATT026674.2	ENSRNOT00000043831	ENSRNOG00000034089	Ttc21a	-70.1
NONRATT026674.2	ENSRNOT00000083078	ENSRNOG00000005840	Cacfd1	-82.8
NONRATT026674.2	ENSRNOT00000082733	ENSRNOG00000016123	Rnf144b	-82.5
NONRATT026674.2	ENSRNOT00000033107	ENSRNOG00000024120	Rxfp1	-82.8
NONRATT026674.2	ENSRNOT00000010806	ENSRNOG00000008081	Ddx27	-83.9
NONRATT026674.2	ENSRNOT00000036966	ENSRNOG00000026762	RT1-DOa	-80.4
NONRATT026674.2	ENSRNOT00000057218	ENSRNOG00000000590	Naglt1	-80.5
NONRATT026674.2	ENSRNOT00000066121	ENSRNOG00000042037	Smim7	-81
NONRATT026674.2	ENSRNOT00000078187	ENSRNOG00000009582	Rpe65	-72.8
NONRATT026674.2	ENSRNOT00000055875	ENSRNOG00000016965	Anapc1	-81.6
NONRATT026674.2	ENSRNOT00000091232	ENSRNOG00000000833	Vars2	-70.8
NONRATT026674.2	ENSRNOT00000021582	ENSRNOG00000015916	Ttc38	-75.7
NONRATT026674.2	ENSRNOT00000042146	ENSRNOG00000033147	Dear	-70.1
NONRATT026674.2	ENSRNOT00000060656	ENSRNOG00000039568	RGD1308112	-75.3
NONRATT026674.2	ENSRNOT00000039234	ENSRNOG00000022745	RGD1306502	-82.8
NONRATT026674.2	ENSRNOT00000017224	ENSRNOG00000012865	Parp3	-83.9
NONRATT026674.2	ENSRNOT00000010678	ENSRNOG00000007972	Rbbp9	-75.1
NONRATT026674.2	ENSRNOT00000029223	ENSRNOG00000005153	LOC690422	-79.1
NONRATT026674.2	ENSRNOT00000036473	ENSRNOG00000026582	RGD1310212	-83.9
NONRATT026674.2	ENSRNOT00000005425	ENSRNOG00000004030	Nphs2	-83.9
NONRATT026674.2	ENSRNOT00000023709	ENSRNOG00000017575	Gins2	-82.8
NONRATT026674.2	ENSRNOT00000000574	ENSRNOG00000026799	Zbtb9	-81.5
NONRATT026674.2	ENSRNOT00000037659	ENSRNOG00000027263	RGD1562550	-73.5
NONRATT026674.2	ENSRNOT00000020751	ENSRNOG00000015271	LOC691135	-82.8
NONRATT026674.2	ENSRNOT00000022022	ENSRNOG00000029549	Eci3	-80.1
NONRATT026674.2	ENSRNOT00000083787	ENSRNOG00000007701	Thoc7	-84
NONRATT026674.2	ENSRNOT00000036185	ENSRNOG00000026114	Ap5b1	-82.8
NONRATT026674.2	ENSRNOT00000032363	ENSRNOG00000024625	Proser3	-83.9
NONRATT026674.2	ENSRNOT00000005084	ENSRNOG00000003795	Angel2	-82.8
NONRATT026674.2	ENSRNOT00000091485	ENSRNOG00000026762	RT1-DOa	-80.4
NONRATT026674.2	ENSRNOT00000089591	ENSRNOG00000011975	Crtc3	-80.5
NONRATT026674.2	ENSRNOT00000024256	ENSRNOG00000017975	Dnajb13	-76.7
NONRATT026674.2	ENSRNOT00000021685	ENSRNOG00000023995	Ankrd39	-82
NONRATT026674.2	ENSRNOT00000061558	ENSRNOG00000021518	Trim31	-82.8
NONRATT026674.2	ENSRNOT00000001536	ENSRNOG00000001161	Gatc	-80.8
NONRATT026674.2	ENSRNOT00000089386	ENSRNOG00000051408	Magt1	-83.6
NONRATT026674.2	ENSRNOT00000016776	ENSRNOG00000012439	Bid	-83.9
NONRATT026674.2	ENSRNOT00000054948	ENSRNOG00000036681	Myadml2	-82
NONRATT026674.2	ENSRNOT00000013031	ENSRNOG00000009830	Fam204a	-73.9
NONRATT026674.2	ENSRNOT00000080138	ENSRNOG00000049505	Nup43	-82.7
NONRATT026674.2	ENSRNOT00000026279	ENSRNOG00000019246	Psme2	-79.1
NONRATT026674.2	ENSRNOT00000076397	ENSRNOG00000051170	Ddx17	-80.5
NONRATT026674.2	ENSRNOT00000000597	ENSRNOG00000000502	Def6	-74.7
NONRATT026674.2	ENSRNOT00000066396	ENSRNOG00000004909	Cnot2	-76.3
NONRATT026674.2	ENSRNOT00000027974	ENSRNOG00000020598	Kcnk6	-83.9
NONRATT026674.2	ENSRNOT00000013114	ENSRNOG00000009567	Mrpl10	-80.2
NONRATT026674.2	ENSRNOT00000038138	ENSRNOG00000020527	Drap1	-83.5
NONRATT026674.2	ENSRNOT00000044628	ENSRNOG00000029841	Cdh19	-77.5
NONRATT026674.2	ENSRNOT00000007588	ENSRNOG00000026702	Amica1	-83.9
NONRATT026674.2	ENSRNOT00000025848	ENSRNOG00000019098	Car5a	-81.9
NONRATT026674.2	ENSRNOT00000013963	ENSRNOG00000010472	Ccdc32	-83.9
NONRATT026674.2	ENSRNOT00000091016	ENSRNOG00000005659	Aurkb	-76.4
NONRATT026674.2	ENSRNOT00000025560	ENSRNOG00000018910	Abhd11	-83.9
NONRATT026674.2	ENSRNOT00000001600	ENSRNOG00000028814	Oasl2	-80.2
NONRATT026674.2	ENSRNOT00000024829	ENSRNOG00000018408	RGD1307554	-79.8
NONRATT026674.2	ENSRNOT00000025570	ENSRNOG00000018668	Glg1	-83.9
NONRATT026674.2	ENSRNOT00000082035	ENSRNOG00000057127	RGD1562673	-83.9
NONRATT026674.2	ENSRNOT00000022659	ENSRNOG00000016871	Prl8a5	-71.1
NONRATT026674.2	ENSRNOT00000089014	ENSRNOG00000017383	l7Rn6	-77.7
NONRATT026674.2	ENSRNOT00000077623	ENSRNOG00000045838	Hps1	-83.7
NONRATT026674.2	ENSRNOT00000044944	ENSRNOG00000000201	Gsta5	-83.9
NONRATT026674.2	ENSRNOT00000010675	ENSRNOG00000007701	Thoc7	-84
NONRATT026674.2	ENSRNOT00000056355	ENSRNOG00000037275	Tlcd2	-80.8
NONRATT026674.2	ENSRNOT00000018014	ENSRNOG00000013446	Nif3l1	-77.9
NONRATT026674.2	ENSRNOT00000027196	ENSRNOG00000020076	RGD1311783	-69.2
NONRATT026674.2	ENSRNOT00000029230	ENSRNOG00000026488	Gltpd2	-82.7
NONRATT026674.2	ENSRNOT00000011869	ENSRNOG00000008736	Slamf8	-83.9
NONRATT026674.2	ENSRNOT00000020345	ENSRNOG00000015168	LOC365238	-83.9
NONRATT026674.2	ENSRNOT00000024841	ENSRNOG00000018375	Eif2b3	-82.7
NONRATT026674.2	ENSRNOT00000011913	ENSRNOG00000009008	Rab39a	-74.6
NONRATT026674.2	ENSRNOT00000026941	ENSRNOG00000019850	Speg	-66.8
NONRATT026674.2	ENSRNOT00000016840	ENSRNOG00000012579	Tlcd1	-71.8
NONRATT026674.2	ENSRNOT00000037766	ENSRNOG00000023920	Zfp791	-80.8
NONRATT026674.2	ENSRNOT00000080540	ENSRNOG00000002820	LOC24906	-78.5
NONRATT026674.2	ENSRNOT00000031458	ENSRNOG00000023023	Trpt1	-82.4
NONRATT026674.2	ENSRNOT00000017141	ENSRNOG00000012714	RGD1564149	-80.5
NONRATT026674.2	ENSRNOT00000026407	ENSRNOG00000019519	Idnk	-83.9
NONRATT026674.2	ENSRNOT00000008680	ENSRNOG00000006608	Tmem70	-78.4
NONRATT026674.2	ENSRNOT00000012312	ENSRNOG00000009245	Exosc2	-75.6
NONRATT026674.2	ENSRNOT00000047734	ENSRNOG00000007436	LOC100158225	-83.9
NONRATT026674.2	ENSRNOT00000087383	ENSRNOG00000004555	Sec14l4	-78.3
NONRATT026674.2	ENSRNOT00000013182	ENSRNOG00000009919	Irg1	-81.1
NONRATT026674.2	ENSRNOT00000010714	ENSRNOG00000008030	Shc2	-83.9
NONRATT026674.2	ENSRNOT00000045056	ENSRNOG00000032058	Pogk	-80.9
NONRATT026674.2	ENSRNOT00000038365	ENSRNOG00000025360	Exd1	-80.5
NONRATT023194.2	ENSRNOT00000009122	ENSRNOG00000006399	Synj2bp	-88.5
NONRATT023194.2	ENSRNOT00000072653	ENSRNOG00000050059	AABR07035776.1	-87.8
NONRATT023194.2	ENSRNOT00000030485	ENSRNOG00000027088	Ube2k	-91.2
NONRATT023194.2	ENSRNOT00000079905	ENSRNOG00000023346	Rsg1	-95.4
NONRATT023194.2	ENSRNOT00000004183	ENSRNOG00000003136	Fcrla	-86.7
NONRATT023194.2	ENSRNOT00000068666	ENSRNOG00000019196	Xpnpep3	-91.5
NONRATT023194.2	ENSRNOT00000074632	ENSRNOG00000048258	Cisd2	-86.9
NONRATT023194.2	ENSRNOT00000013602	ENSRNOG00000010227	Gpatch2l	-83.2
NONRATT023194.2	ENSRNOT00000060193	ENSRNOG00000039297	Mrpl52	-88.3
NONRATT023194.2	ENSRNOT00000009904	ENSRNOG00000007310	Klrb1b	-93.4
NONRATT023194.2	ENSRNOT00000013001	ENSRNOG00000009815	Pnma2	-93.4
NONRATT023194.2	ENSRNOT00000083592	ENSRNOG00000060130	Ypel4	-93.4
NONRATT023194.2	ENSRNOT00000081140	ENSRNOG00000052415	Gstt2	-95.4
NONRATT023194.2	ENSRNOT00000031904	ENSRNOG00000027434	Fitm2	-93.5
NONRATT023194.2	ENSRNOT00000024465	ENSRNOG00000017938	Btaf1	-88
NONRATT023194.2	ENSRNOT00000024366	ENSRNOG00000018102	Coa5	-81.3
NONRATT023194.2	ENSRNOT00000085812	ENSRNOG00000009172	Cpvl	-93.4
NONRATT023194.2	ENSRNOT00000025732	ENSRNOG00000039730	Orai3	-80.1
NONRATT023194.2	ENSRNOT00000002779	ENSRNOG00000002032	Ifngr2	-95.4
NONRATT023194.2	ENSRNOT00000007598	ENSRNOG00000005749	Foxred2	-84.1
NONRATT023194.2	ENSRNOT00000024054	ENSRNOG00000017693	Slc2a5	-86.1
NONRATT023194.2	ENSRNOT00000015556	ENSRNOG00000011649	Epb42	-88.8
NONRATT023194.2	ENSRNOT00000022713	ENSRNOG00000022054	Paqr7	-86.4
NONRATT023194.2	ENSRNOT00000015016	ENSRNOG00000011304	LOC100360397	-85.4
NONRATT023194.2	ENSRNOT00000002987	ENSRNOG00000002194	Coq2	-90.7
NONRATT023194.2	ENSRNOT00000024976	ENSRNOG00000018476	Fuom	-95.4
NONRATT023194.2	ENSRNOT00000016327	ENSRNOG00000011909	Rasa2	-84.8
NONRATT023194.2	ENSRNOT00000037739	ENSRNOG00000027332	Gemin6	-88.3
NONRATT023194.2	ENSRNOT00000026168	ENSRNOG00000019352	Emc6	-86.2
NONRATT023194.2	ENSRNOT00000064015	ENSRNOG00000013855	Zmym1	-86.7
NONRATT023194.2	ENSRNOT00000009430	ENSRNOG00000007018	Mapkbp1	-90.7
NONRATT023194.2	ENSRNOT00000012379	ENSRNOG00000009227	Aplnr	-84.1
NONRATT023194.2	ENSRNOT00000083046	ENSRNOG00000054863	Usp4	-88.8
NONRATT023194.2	ENSRNOT00000010508	ENSRNOG00000007981	Klhl23	-86.6
NONRATT023194.2	ENSRNOT00000083144	ENSRNOG00000060052	AABR07063516.1	-90
NONRATT023194.2	ENSRNOT00000006018	ENSRNOG00000004337	Fam20b	-88.1
NONRATT023194.2	ENSRNOT00000013286	ENSRNOG00000009951	Aif1l	-92.8
NONRATT023194.2	ENSRNOT00000079641	ENSRNOG00000014461	Galns	-90
NONRATT023194.2	ENSRNOT00000028187	ENSRNOG00000020777	Zfp382	-90.7
NONRATT023194.2	ENSRNOT00000010238	ENSRNOG00000007508	Lrtm2	-90
NONRATT023194.2	ENSRNOT00000002410	ENSRNOG00000001770	Ehhadh	-93.4
NONRATT023194.2	ENSRNOT00000005715	ENSRNOG00000004263	Ints7	-88
NONRATT023194.2	ENSRNOT00000009202	ENSRNOG00000006893	Ppm1k	-90.7
NONRATT023194.2	ENSRNOT00000085591	ENSRNOG00000037509	Chek2	-84.8
NONRATT023194.2	ENSRNOT00000043518	ENSRNOG00000031896	Stt3a	-95.4
NONRATT023194.2	ENSRNOT00000000621	ENSRNOG00000000515	Mapk13	-95.4
NONRATT023194.2	ENSRNOT00000025933	ENSRNOG00000019080	Hsd3b7	-90.7
NONRATT023194.2	ENSRNOT00000001923	ENSRNOG00000001419	Cldn15	-90.9
NONRATT023194.2	ENSRNOT00000074626	ENSRNOG00000048043	F2r	-77.6
NONRATT023194.2	ENSRNOT00000013409	ENSRNOG00000030538	Slco1b2	-83.1
NONRATT023194.2	ENSRNOT00000065593	ENSRNOG00000031993	Prim1	-77.4
NONRATT023194.2	ENSRNOT00000035245	ENSRNOG00000021560	Cass4	-93.4
NONRATT023194.2	ENSRNOT00000024896	ENSRNOG00000018464	Lipt1	-81.6
NONRATT023194.2	ENSRNOT00000012940	ENSRNOG00000009506	Mre11a	-90.7
NONRATT023194.2	ENSRNOT00000020069	ENSRNOG00000014909	Sh2d5	-84.9
NONRATT023194.2	ENSRNOT00000089265	ENSRNOG00000012878	Atp7b	-90.7
NONRATT023194.2	ENSRNOT00000080099	ENSRNOG00000056621	AC099384.2	-81
NONRATT023194.2	ENSRNOT00000013463	ENSRNOG00000010034	Asah1	-84.1
NONRATT023194.2	ENSRNOT00000013515	ENSRNOG00000010134	Acot2	-90
NONRATT023194.2	ENSRNOT00000011344	ENSRNOG00000008336	Tnfrsf11b	-86.2
NONRATT023194.2	ENSRNOT00000001139	ENSRNOG00000000854	Ncr3	-90.7
NONRATT023194.2	ENSRNOT00000033017	ENSRNOG00000018999	Cdc14b	-88.1
NONRATT023194.2	ENSRNOT00000073220	ENSRNOG00000045795	Pddc1	-82.9
NONRATT023194.2	ENSRNOT00000023977	ENSRNOG00000017819	Cd14	-87
NONRATT023194.2	ENSRNOT00000009709	ENSRNOG00000007333	Wdr20	-86.2
NONRATT023194.2	ENSRNOT00000042289	ENSRNOG00000027867	Rexo4	-86.2
NONRATT023194.2	ENSRNOT00000002032	ENSRNOG00000001483	Wbscr16	-84.1
NONRATT023194.2	ENSRNOT00000076439	ENSRNOG00000014909	Sh2d5	-84.9
NONRATT023194.2	ENSRNOT00000026588	ENSRNOG00000019630	Hacl1	-86.2
NONRATT023194.2	ENSRNOT00000067150	ENSRNOG00000020216	Gmpr2	-93.4
NONRATT023194.2	ENSRNOT00000020182	ENSRNOG00000014940	Sfrp5	-86.2
NONRATT023194.2	ENSRNOT00000080191	ENSRNOG00000057245	Rbbp8nl	-95.4
NONRATT023194.2	ENSRNOT00000015568	ENSRNOG00000011652	Sppl2a	-89.3
NONRATT023194.2	ENSRNOT00000083287	ENSRNOG00000014903	Zfyve27	-93.4
NONRATT023194.2	ENSRNOT00000009910	ENSRNOG00000007197	Nr1h4	-88.5
NONRATT023194.2	ENSRNOT00000006195	ENSRNOG00000004660	Fzd6	-89.7
NONRATT023194.2	ENSRNOT00000010730	ENSRNOG00000008118	Sync	-93.4
NONRATT023194.2	ENSRNOT00000004244	ENSRNOG00000003176	Mixl1	-91.2
NONRATT023194.2	ENSRNOT00000077313	ENSRNOG00000052687	Megf8	-93.4
NONRATT023194.2	ENSRNOT00000026204	ENSRNOG00000019376	Zfp329	-89.6
NONRATT023194.2	ENSRNOT00000061249	ENSRNOG00000019232	RGD1311345	-95.4
NONRATT023194.2	ENSRNOT00000030559	ENSRNOG00000028185	Tstd3	-83.2
NONRATT023194.2	ENSRNOT00000029039	ENSRNOG00000007758	LOC100362350	-85
NONRATT023194.2	ENSRNOT00000026414	ENSRNOG00000019414	Tmem79	-87.5
NONRATT023194.2	ENSRNOT00000089875	ENSRNOG00000005982	C1d	-95.4
NONRATT023194.2	ENSRNOT00000048349	ENSRNOG00000007943	Gsdma	-80.6
NONRATT023194.2	ENSRNOT00000081146	ENSRNOG00000014555	Aox4	-88.9
NONRATT023194.2	ENSRNOT00000031044	ENSRNOG00000024266	Haus5	-95.4
NONRATT023194.2	ENSRNOT00000010468	ENSRNOG00000007548	Polr3f	-86.7
NONRATT023194.2	ENSRNOT00000034683	ENSRNOG00000025184	Prss35	-88.5
NONRATT023194.2	ENSRNOT00000010056	ENSRNOG00000007637	Acer2	-93.4
NONRATT023194.2	ENSRNOT00000043085	ENSRNOG00000003050	Tbc1d9b	-87.5
NONRATT023194.2	ENSRNOT00000054685	ENSRNOG00000014705	Rbm20	-93.4
NONRATT023194.2	ENSRNOT00000008892	ENSRNOG00000006806	Setmar	-80.9
NONRATT023194.2	ENSRNOT00000065791	ENSRNOG00000020420	Pklr	-88.8
NONRATT023194.2	ENSRNOT00000091442	ENSRNOG00000022402	Luzp1	-86.7
NONRATT023194.2	ENSRNOT00000075344	ENSRNOG00000046002	LOC301124	-82.3
NONRATT023194.2	ENSRNOT00000076173	ENSRNOG00000026716	Rpl9	-95.4
NONRATT023194.2	ENSRNOT00000037039	ENSRNOG00000028493	Ppp1r15b	-89.6
NONRATT023194.2	ENSRNOT00000049722	ENSRNOG00000033665	Mrgprx2	-87.8
NONRATT023194.2	ENSRNOT00000020499	ENSRNOG00000015249	RGD1562299	-93.2
NONRATT023194.2	ENSRNOT00000044541	ENSRNOG00000030363	Psma8	-90.7
NONRATT023194.2	ENSRNOT00000000125	ENSRNOG00000000113	Elac1	-90.7
NONRATT023194.2	ENSRNOT00000019991	ENSRNOG00000014712	Zfp39	-88.3
NONRATT023194.2	ENSRNOT00000022962	ENSRNOG00000016897	Rlbp1	-83.6
NONRATT023194.2	ENSRNOT00000010753	ENSRNOG00000007851	Psma3	-95.4
NONRATT023194.2	ENSRNOT00000036999	ENSRNOG00000022283	Lhfpl5	-93.4
NONRATT023194.2	ENSRNOT00000021596	ENSRNOG00000015616	Rgs14	-84.8
NONRATT023194.2	ENSRNOT00000014478	ENSRNOG00000009549	Fbxo3	-78.2
NONRATT023194.2	ENSRNOT00000090170	ENSRNOG00000029938	Pik3c2b	-95.9
NONRATT023194.2	ENSRNOT00000042606	ENSRNOG00000012594	Sugt1	-95.4
NONRATT023194.2	ENSRNOT00000031336	ENSRNOG00000021433	Arhgef39	-75.5
NONRATT023194.2	ENSRNOT00000090790	ENSRNOG00000055716	Oscar	-85.9
NONRATT023194.2	ENSRNOT00000042539	ENSRNOG00000000503	Ppard	-94.5
NONRATT023194.2	ENSRNOT00000016993	ENSRNOG00000012564	RGD1564541	-92.5
NONRATT023194.2	ENSRNOT00000016468	ENSRNOG00000012184	Urgcp	-95.2
NONRATT023194.2	ENSRNOT00000026165	ENSRNOG00000019317	Cplx3	-93.4
NONRATT023194.2	ENSRNOT00000076811	ENSRNOG00000012184	Urgcp	-94.7
NONRATT023194.2	ENSRNOT00000077803	ENSRNOG00000001073	RGD1563482	-90.7
NONRATT023194.2	ENSRNOT00000016040	ENSRNOG00000011964	Abcd4	-92.8
NONRATT023194.2	ENSRNOT00000019556	ENSRNOG00000039528	Fam32a	-95.4
NONRATT023194.2	ENSRNOT00000090536	ENSRNOG00000015616	Rgs14	-84.8
NONRATT023194.2	ENSRNOT00000080574	ENSRNOG00000060325	Lefty2	-90.7
NONRATT023194.2	ENSRNOT00000026540	ENSRNOG00000060429		-84.8
NONRATT023194.2	ENSRNOT00000002520	ENSRNOG00000001842	Mrps35	-92.1
NONRATT023194.2	ENSRNOT00000005426	ENSRNOG00000004091	Cwc25	-93.4
NONRATT023194.2	ENSRNOT00000002028	ENSRNOG00000001480	Ncf1	-86.8
NONRATT023194.2	ENSRNOT00000025241	ENSRNOG00000018590	Drg1	-86.1
NONRATT023194.2	ENSRNOT00000031549	ENSRNOG00000025808	Aars2	-85.9
NONRATT023194.2	ENSRNOT00000068360	ENSRNOG00000025269	Slc25a44	-93.4
NONRATT023194.2	ENSRNOT00000089138	ENSRNOG00000019232	RGD1311345	-95.4
NONRATT023194.2	ENSRNOT00000029184	ENSRNOG00000028548	Ccl9	-93.5
NONRATT023194.2	ENSRNOT00000049759	ENSRNOG00000015582	Me2	-90
NONRATT023194.2	ENSRNOT00000091284	ENSRNOG00000056703	Atrx	-82.8
NONRATT023194.2	ENSRNOT00000011941	ENSRNOG00000008694	Miox	-84.5
NONRATT023194.2	ENSRNOT00000008282	ENSRNOG00000006237	Gpr37l1	-93.4
NONRATT023194.2	ENSRNOT00000021833	ENSRNOG00000016010	Mul1	-85.3
NONRATT023194.2	ENSRNOT00000030462	ENSRNOG00000010345	Ssmem1	-91.8
NONRATT023194.2	ENSRNOT00000091725	ENSRNOG00000026807	LOC362863	-93.5
NONRATT023194.2	ENSRNOT00000080555	ENSRNOG00000020777	Zfp382	-95.4
NONRATT023194.2	ENSRNOT00000087612	ENSRNOG00000058003	Spon1	-93.4
NONRATT023194.2	ENSRNOT00000019127	ENSRNOG00000026295	Rbpjl	-83.8
NONRATT023194.2	ENSRNOT00000025342	ENSRNOG00000018752	Clcf1	-91.5
NONRATT023194.2	ENSRNOT00000086719	ENSRNOG00000007115	Crebl2	-90.7
NONRATT023194.2	ENSRNOT00000086042	ENSRNOG00000047905	Dus1l	-90.7
NONRATT023194.2	ENSRNOT00000085609	ENSRNOG00000054863	Usp4	-88.8
NONRATT023194.2	ENSRNOT00000086888	ENSRNOG00000003629	Nvl	-87.8
NONRATT023194.2	ENSRNOT00000082524	ENSRNOG00000022877	Poldip3	-87.5
NONRATT023194.2	ENSRNOT00000043737	ENSRNOG00000030688	Lrrc2	-87.8
NONRATT023194.2	ENSRNOT00000064828	ENSRNOG00000000082	Hltf	-82.2
NONRATT023194.2	ENSRNOT00000073746	ENSRNOG00000046493	Pnpo	-86.1
NONRATT023194.2	ENSRNOT00000066657	ENSRNOG00000013529	Stk4	-90
NONRATT023194.2	ENSRNOT00000027753	ENSRNOG00000020463	Eif1ad	-84.3
NONRATT023194.2	ENSRNOT00000090407	ENSRNOG00000060436	Vti1b	-83.2
NONRATT023194.2	ENSRNOT00000033684	ENSRNOG00000027654	Appbp2	-87.5
NONRATT023194.2	ENSRNOT00000089016	ENSRNOG00000059463	Slc39a1	-86.7
NONRATT023194.2	ENSRNOT00000031026	ENSRNOG00000024410	Blvrb	-93.4
NONRATT023194.2	ENSRNOT00000055735	ENSRNOG00000016214	Agl	-83.6
NONRATT023194.2	ENSRNOT00000081539	ENSRNOG00000054581	Tmem101	-95.4
NONRATT023194.2	ENSRNOT00000056355	ENSRNOG00000037275	Tlcd2	-90
NONRATT023194.2	ENSRNOT00000065677	ENSRNOG00000042944	Cenpw	-90.7
NONRATT023194.2	ENSRNOT00000017202	ENSRNOG00000012763	Cwf19l1	-93.4
NONRATT023194.2	ENSRNOT00000021064	ENSRNOG00000015538	Abcd2	-95.4
NONRATT023194.2	ENSRNOT00000024122	ENSRNOG00000017904	Nol7	-84.1
NONRATT023194.2	ENSRNOT00000026156	ENSRNOG00000019208	P2rx5	-89.3
NONRATT023194.2	ENSRNOT00000078439	ENSRNOG00000030688	Lrrc2	-87.8
NONRATT023194.2	ENSRNOT00000003823	ENSRNOG00000002843	Cxcl6	-93.4
NONRATT023194.2	ENSRNOT00000016679	ENSRNOG00000012475	Prr5	-88.8
NONRATT023194.2	ENSRNOT00000085488	ENSRNOG00000052167	Marveld2	-83.2
NONRATT023194.2	ENSRNOT00000027241	ENSRNOG00000020088	Klhl26	-94.5
NONRATT023194.2	ENSRNOT00000005807	ENSRNOG00000004399	Dlx4	-95.4
NONRATT023194.2	ENSRNOT00000087327	ENSRNOG00000053675	Dhh	-95.4
NONRATT023194.2	ENSRNOT00000066103	ENSRNOG00000025324	Spire1	-95.4
NONRATT023194.2	ENSRNOT00000084642	ENSRNOG00000052142	Ahsa2	-86.2
NONRATT023194.2	ENSRNOT00000035865	ENSRNOG00000025815	Cdr2l	-86.7
NONRATT023194.2	ENSRNOT00000054954	ENSRNOG00000036686	Anapc11	-93.4
NONRATT023194.2	ENSRNOT00000021917	ENSRNOG00000016279	Zfp865	-87
NONRATT023194.2	ENSRNOT00000002397	ENSRNOG00000001758	Tctex1d2	-75.8
NONRATT023194.2	ENSRNOT00000019703	ENSRNOG00000014493	Golga1	-93.4
NONRATT023194.2	ENSRNOT00000023706	ENSRNOG00000017349	Tbc1d10b	-93.4
NONRATT023194.2	ENSRNOT00000013514	ENSRNOG00000030538	Slco1b2	-83.1
NONRATT023194.2	ENSRNOT00000084017	ENSRNOG00000058790	Fam120b	-91.3
NONRATT023194.2	ENSRNOT00000075570	ENSRNOG00000046036	Rn60_1_2787.1	-93.4
NONRATT023194.2	ENSRNOT00000035047	ENSRNOG00000024543	RGD1561777	-90.7
NONRATT023194.2	ENSRNOT00000090987	ENSRNOG00000059474	Mob1a	-83.8
NONRATT023194.2	ENSRNOT00000075201	ENSRNOG00000047295	Prr22	-93.4
NONRATT023194.2	ENSRNOT00000083109	ENSRNOG00000000503	Ppard	-94.5
NONRATT001063.2	ENSRNOT00000052029	ENSRNOG00000050831	Vom2r35	-80.6
NONRATT001063.2	ENSRNOT00000082064	ENSRNOG00000060246	Klrd1	-76.4
NONRATT001063.2	ENSRNOT00000067460	ENSRNOG00000042786	Vti1a	-85.6
NONRATT001063.2	ENSRNOT00000086481	ENSRNOG00000042471	RGD1560324	-82.4
NONRATT013457.2	ENSRNOT00000067460	ENSRNOG00000042786	Vti1a	-69.9
ENSRNOT00000080510	ENSRNOT00000049437	ENSRNOG00000000378	Ctnna3	-58.3
NONRATT013693.2	ENSRNOT00000010271	ENSRNOG00000007793	Pnrc1	-103.3
NONRATT029261.2	ENSRNOT00000075279	ENSRNOG00000050843	Mut	-84.1
NONRATT009218.2	ENSRNOT00000020182	ENSRNOG00000014940	Sfrp5	-81.4
NONRATT009218.2	ENSRNOT00000065593	ENSRNOG00000031993	Prim1	-81.6
NONRATT009218.2	ENSRNOT00000060193	ENSRNOG00000039297	Mrpl52	-81.4
NONRATT009218.2	ENSRNOT00000001139	ENSRNOG00000000854	Ncr3	-81.6
NONRATT009218.2	ENSRNOT00000016993	ENSRNOG00000012564	RGD1564541	-82.2
NONRATT009218.2	ENSRNOT00000076439	ENSRNOG00000014909	Sh2d5	-81.4
NONRATT009218.2	ENSRNOT00000086719	ENSRNOG00000007115	Crebl2	-82.5
NONRATT009218.2	ENSRNOT00000020069	ENSRNOG00000014909	Sh2d5	-81.4
NONRATT009218.2	ENSRNOT00000031044	ENSRNOG00000024266	Haus5	-81.6
NONRATT009218.2	ENSRNOT00000023709	ENSRNOG00000017575	Gins2	-81
NONRATT009218.2	ENSRNOT00000036702	ENSRNOG00000024178	Cenpt	-82.6
NONRATT009218.2	ENSRNOT00000065791	ENSRNOG00000020420	Pklr	-81.4
NONRATT009218.2	ENSRNOT00000043518	ENSRNOG00000031896	Stt3a	-81.6
NONRATT009218.2	ENSRNOT00000012940	ENSRNOG00000009506	Mre11a	-79.7
NONRATT009218.2	ENSRNOT00000080574	ENSRNOG00000060325	Lefty2	-81.4
NONRATT009218.2	ENSRNOT00000025241	ENSRNOG00000018590	Drg1	-81.6
NONRATT009218.2	ENSRNOT00000073220	ENSRNOG00000045795	Pddc1	-81.4
NONRATT009218.2	ENSRNOT00000080191	ENSRNOG00000057245	Rbbp8nl	-81.4
NONRATT009218.2	ENSRNOT00000026165	ENSRNOG00000019317	Cplx3	-79.4
NONRATT009218.2	ENSRNOT00000084642	ENSRNOG00000052142	Ahsa2	-81.4
NONRATT009218.2	ENSRNOT00000006186	ENSRNOG00000004532	Fam69b	-79
NONRATT009218.2	ENSRNOT00000016714	ENSRNOG00000012020	Nsun4	-77.8
NONRATT009218.2	ENSRNOT00000042289	ENSRNOG00000027867	Rexo4	-84.7
NONRATT009218.2	ENSRNOT00000074939	ENSRNOG00000050534	Gcnt1	-81.3
NONRATT009218.2	ENSRNOT00000033684	ENSRNOG00000027654	Appbp2	-79.2
NONRATT009218.2	ENSRNOT00000028187	ENSRNOG00000020777	Zfp382	-81.5
NONRATT009218.2	ENSRNOT00000021833	ENSRNOG00000016010	Mul1	-81.4
NONRATT009218.2	ENSRNOT00000081140	ENSRNOG00000052415	Gstt2	-83.8
NONRATT008331.2	ENSRNOT00000077157	ENSRNOG00000059406	Ier5	-104.6
NONRATT013737.2	ENSRNOT00000033784	ENSRNOG00000024428	Kif20a	-94.2
NONRATT005309.2	ENSRNOT00000005129	ENSRNOG00000003865	Tmigd1	-78
NONRATT005309.2	ENSRNOT00000079643	ENSRNOG00000052273	3110040N11Rik	-81.7
NONRATT005309.2	ENSRNOT00000079826	ENSRNOG00000020374	Tmem8a	-84.1
NONRATT005309.2	ENSRNOT00000008730	ENSRNOG00000006467	Eif2b2	-81.3
NONRATT005309.2	ENSRNOT00000087355	ENSRNOG00000011962	Gin1	-74.7
NONRATT005309.2	ENSRNOT00000018259	ENSRNOG00000013521	Dhfr	-74.3
NONRATT005309.2	ENSRNOT00000020174	ENSRNOG00000014801	Exog	-84.5
NONRATT005309.2	ENSRNOT00000082023	ENSRNOG00000021702	Mcmdc2	-73.5
NONRATT005309.2	ENSRNOT00000080769	ENSRNOG00000005193	Pfas	-74.7
NONRATT005309.2	ENSRNOT00000030749	ENSRNOG00000022502	Nsrp1	-84.5
NONRATT005309.2	ENSRNOT00000012170	ENSRNOG00000009118	Pou2f3	-76.6
NONRATT005309.2	ENSRNOT00000047380	ENSRNOG00000032561	Slc52a2	-81.8
NONRATT005309.2	ENSRNOT00000091172	ENSRNOG00000059997	Brip1	-77.7
NONRATT005309.2	ENSRNOT00000014470	ENSRNOG00000010680	Med12l	-81.3
NONRATT005309.2	ENSRNOT00000014708	ENSRNOG00000012227	Stambp	-84.5
NONRATT005309.2	ENSRNOT00000022483	ENSRNOG00000016767	Ggps1	-84.5
NONRATT005309.2	ENSRNOT00000077646	ENSRNOG00000054751	Lmbrd2	-84.5
NONRATT005309.2	ENSRNOT00000089625	ENSRNOG00000001527	Cd80	-79.8
NONRATT005309.2	ENSRNOT00000085203	ENSRNOG00000003634	Zfp354a	-71.4
NONRATT005309.2	ENSRNOT00000078739	ENSRNOG00000051592	Sirt1	-84.5
NONRATT005309.2	ENSRNOT00000038953	ENSRNOG00000021365	Ybey	-77.2
NONRATT005309.2	ENSRNOT00000002396	ENSRNOG00000001757	Tm4sf19	-78.3
NONRATT005309.2	ENSRNOT00000068334	ENSRNOG00000012734	Dcun1d1	-84.5
NONRATT005309.2	ENSRNOT00000026156	ENSRNOG00000019208	P2rx5	-83.8
NONRATT005309.2	ENSRNOT00000076602	ENSRNOG00000024128	Aco2	-81.6
NONRATT005309.2	ENSRNOT00000079290	ENSRNOG00000020630	Il9r	-78.9
NONRATT005309.2	ENSRNOT00000002427	ENSRNOG00000001781	Lmln	-77.9
NONRATT005309.2	ENSRNOT00000028591	ENSRNOG00000021056	Kcnj14	-84.5
NONRATT005309.2	ENSRNOT00000055158	ENSRNOG00000013713	LOC499240	-79.5
NONRATT005309.2	ENSRNOT00000080727	ENSRNOG00000023712	Stox1	-78.9
NONRATT005309.2	ENSRNOT00000017005	ENSRNOG00000011879	Nfat5	-78.5
NONRATT005309.2	ENSRNOT00000025385	ENSRNOG00000018781	Map1s	-81.7
NONRATT005309.2	ENSRNOT00000072099	ENSRNOG00000048712	Ccdc137	-74.4
NONRATT005309.2	ENSRNOT00000019247	ENSRNOG00000014214	Rpl27a	-77.1
NONRATT005309.2	ENSRNOT00000083109	ENSRNOG00000000503	Ppard	-79.2
NONRATT005309.2	ENSRNOT00000084486	ENSRNOG00000059640	Ccl28	-70.4
NONRATT005309.2	ENSRNOT00000007544	ENSRNOG00000005618	Fmc1	-81.3
NONRATT005309.2	ENSRNOT00000055735	ENSRNOG00000016214	Agl	-84.5
NONRATT005309.2	ENSRNOT00000084766	ENSRNOG00000051548	Lmod1	-78.9
NONRATT005309.2	ENSRNOT00000080101	ENSRNOG00000016767	Ggps1	-84.5
NONRATT005309.2	ENSRNOT00000090908	ENSRNOG00000022778	Pphln1	-74.3
NONRATT005309.2	ENSRNOT00000028047	ENSRNOG00000020658	Aarsd1	-80.4
NONRATT005309.2	ENSRNOT00000073596	ENSRNOG00000050828	Vkorc1	-84.1
NONRATT005309.2	ENSRNOT00000007202	ENSRNOG00000005378	Gna15	-72.4
NONRATT005309.2	ENSRNOT00000082893	ENSRNOG00000052275	H2afv	-84.5
NONRATT005309.2	ENSRNOT00000004223	ENSRNOG00000003132	Mip	-84.5
NONRATT005309.2	ENSRNOT00000067796	ENSRNOG00000030572	Smc5	-84.1
NONRATT005309.2	ENSRNOT00000058095	ENSRNOG00000038166	Ptgr2	-84.4
NONRATT005309.2	ENSRNOT00000090387	ENSRNOG00000016767	Ggps1	-84.5
NONRATT005309.2	ENSRNOT00000082614	ENSRNOG00000059640	Ccl28	-70.4
NONRATT005309.2	ENSRNOT00000026914	ENSRNOG00000019840	Mdp1	-75.8
NONRATT005309.2	ENSRNOT00000029572	ENSRNOG00000024960	Smco1	-82.7
NONRATT005309.2	ENSRNOT00000052408	ENSRNOG00000049104	LOC100911256	-84.4
NONRATT005309.2	ENSRNOT00000077803	ENSRNOG00000001073	RGD1563482	-79.2
NONRATT005309.2	ENSRNOT00000031614	ENSRNOG00000028176	Elmod2	-78.5
NONRATT005309.2	ENSRNOT00000019117	ENSRNOG00000014231	Pnoc	-84.5
NONRATT005309.2	ENSRNOT00000020793	ENSRNOG00000015459	Heatr3	-84.5
ENSRNOT00000081622	ENSRNOT00000019117	ENSRNOG00000014231	Pnoc	-79.4
ENSRNOT00000081622	ENSRNOT00000007202	ENSRNOG00000005378	Gna15	-73.9
ENSRNOT00000081622	ENSRNOT00000052408	ENSRNOG00000049104	LOC100911256	-80.4
ENSRNOT00000081622	ENSRNOT00000028591	ENSRNOG00000021056	Kcnj14	-75.1
ENSRNOT00000081622	ENSRNOT00000008730	ENSRNOG00000006467	Eif2b2	-78.8
ENSRNOT00000081622	ENSRNOT00000028047	ENSRNOG00000020658	Aarsd1	-75.1
ENSRNOT00000081622	ENSRNOT00000079643	ENSRNOG00000052273	3110040N11Rik	-75.6
ENSRNOT00000081622	ENSRNOT00000089841	ENSRNOG00000003745	Atf3	-75.3
ENSRNOT00000081622	ENSRNOT00000084766	ENSRNOG00000051548	Lmod1	-78.5
ENSRNOT00000081622	ENSRNOT00000085203	ENSRNOG00000003634	Zfp354a	-74.5
ENSRNOT00000081622	ENSRNOT00000083109	ENSRNOG00000000503	Ppard	-74.9
ENSRNOT00000081622	ENSRNOT00000007544	ENSRNOG00000005618	Fmc1	-83.4
ENSRNOT00000081622	ENSRNOT00000091172	ENSRNOG00000059997	Brip1	-74.5
ENSRNOT00000081622	ENSRNOT00000022483	ENSRNOG00000016767	Ggps1	-76.8
ENSRNOT00000081622	ENSRNOT00000004223	ENSRNOG00000003132	Mip	-74.8
ENSRNOT00000081622	ENSRNOT00000077803	ENSRNOG00000001073	RGD1563482	-77.8
ENSRNOT00000081622	ENSRNOT00000018259	ENSRNOG00000013521	Dhfr	-75.1
ENSRNOT00000081622	ENSRNOT00000083490	ENSRNOG00000009719	C2cd2l	-76.8
ENSRNOT00000081622	ENSRNOT00000020174	ENSRNOG00000014801	Exog	-78.6
ENSRNOT00000081622	ENSRNOT00000073596	ENSRNOG00000050828	Vkorc1	-71.3
ENSRNOT00000081622	ENSRNOT00000017005	ENSRNOG00000011879	Nfat5	-71.5
ENSRNOT00000081622	ENSRNOT00000014708	ENSRNOG00000012227	Stambp	-74.8
ENSRNOT00000081622	ENSRNOT00000076602	ENSRNOG00000024128	Aco2	-71.4
ENSRNOT00000081622	ENSRNOT00000014414	ENSRNOG00000010839	Krt222	-81.3
ENSRNOT00000081622	ENSRNOT00000084486	ENSRNOG00000059640	Ccl28	-72.3
ENSRNOT00000081622	ENSRNOT00000058095	ENSRNOG00000038166	Ptgr2	-76.1
ENSRNOT00000081622	ENSRNOT00000055158	ENSRNOG00000013713	LOC499240	-79.9
ENSRNOT00000081622	ENSRNOT00000020793	ENSRNOG00000015459	Heatr3	-81.8
ENSRNOT00000081622	ENSRNOT00000031614	ENSRNOG00000028176	Elmod2	-74.6
ENSRNOT00000081622	ENSRNOT00000026914	ENSRNOG00000019840	Mdp1	-73.9
ENSRNOT00000081622	ENSRNOT00000072099	ENSRNOG00000048712	Ccdc137	-72.9
ENSRNOT00000081622	ENSRNOT00000090387	ENSRNOG00000016767	Ggps1	-76.8
ENSRNOT00000081622	ENSRNOT00000082614	ENSRNOG00000059640	Ccl28	-72.3
ENSRNOT00000081622	ENSRNOT00000038953	ENSRNOG00000021365	Ybey	-79
ENSRNOT00000081622	ENSRNOT00000025385	ENSRNOG00000018781	Map1s	-75.7
ENSRNOT00000081622	ENSRNOT00000079826	ENSRNOG00000020374	Tmem8a	-70.7
ENSRNOT00000081622	ENSRNOT00000002396	ENSRNOG00000001757	Tm4sf19	-74.6
ENSRNOT00000081622	ENSRNOT00000077646	ENSRNOG00000054751	Lmbrd2	-74.4
ENSRNOT00000081622	ENSRNOT00000068334	ENSRNOG00000012734	Dcun1d1	-78.5
ENSRNOT00000081622	ENSRNOT00000078739	ENSRNOG00000051592	Sirt1	-74.4
ENSRNOT00000081622	ENSRNOT00000080101	ENSRNOG00000016767	Ggps1	-76.8
ENSRNOT00000081622	ENSRNOT00000067796	ENSRNOG00000030572	Smc5	-70.7
ENSRNOT00000081622	ENSRNOT00000029572	ENSRNOG00000024960	Smco1	-74.4
ENSRNOT00000081622	ENSRNOT00000080769	ENSRNOG00000005193	Pfas	-70.8
ENSRNOT00000081622	ENSRNOT00000079290	ENSRNOG00000020630	Il9r	-79.9
ENSRNOT00000081622	ENSRNOT00000082893	ENSRNOG00000052275	H2afv	-79.7
ENSRNOT00000081622	ENSRNOT00000055735	ENSRNOG00000016214	Agl	-75.1
ENSRNOT00000081622	ENSRNOT00000014470	ENSRNOG00000010680	Med12l	-78.1
NONRATT011950.2	ENSRNOT00000044198	ENSRNOG00000049498	Nat2	-95.8
NONRATT011950.2	ENSRNOT00000018854	ENSRNOG00000014055	Nat1	-95.8
NONRATT022923.2	ENSRNOT00000083109	ENSRNOG00000000503	Ppard	-79.2
NONRATT022923.2	ENSRNOT00000031614	ENSRNOG00000028176	Elmod2	-74.6
NONRATT022923.2	ENSRNOT00000077646	ENSRNOG00000054751	Lmbrd2	-84.5
NONRATT022923.2	ENSRNOT00000020174	ENSRNOG00000014801	Exog	-84.5
NONRATT022923.2	ENSRNOT00000080727	ENSRNOG00000023712	Stox1	-79.7
NONRATT022923.2	ENSRNOT00000038953	ENSRNOG00000021365	Ybey	-78.1
NONRATT022923.2	ENSRNOT00000089841	ENSRNOG00000003745	Atf3	-80.5
NONRATT022923.2	ENSRNOT00000028047	ENSRNOG00000020658	Aarsd1	-80.4
NONRATT022923.2	ENSRNOT00000082893	ENSRNOG00000052275	H2afv	-84.5
NONRATT022923.2	ENSRNOT00000008730	ENSRNOG00000006467	Eif2b2	-84.1
NONRATT022923.2	ENSRNOT00000029572	ENSRNOG00000024960	Smco1	-82.7
NONRATT022923.2	ENSRNOT00000086131	ENSRNOG00000055344	Trnau1ap	-69.3
NONRATT022923.2	ENSRNOT00000084766	ENSRNOG00000051548	Lmod1	-80
NONRATT022923.2	ENSRNOT00000033493	ENSRNOG00000006699	Mlh3	-69.9
NONRATT022923.2	ENSRNOT00000014708	ENSRNOG00000012227	Stambp	-84.5
NONRATT022923.2	ENSRNOT00000030749	ENSRNOG00000022502	Nsrp1	-84.5
NONRATT022923.2	ENSRNOT00000005129	ENSRNOG00000003865	Tmigd1	-80.5
NONRATT022923.2	ENSRNOT00000002427	ENSRNOG00000001781	Lmln	-80.3
NONRATT022923.2	ENSRNOT00000073596	ENSRNOG00000050828	Vkorc1	-78
NONRATT022923.2	ENSRNOT00000091172	ENSRNOG00000059997	Brip1	-77.7
NONRATT004745.2	ENSRNOT00000003369	ENSRNOG00000002474	Tom1l1	-91.2
NONRATT005770.2	ENSRNOT00000030749	ENSRNOG00000022502	Nsrp1	-81.5
NONRATT005770.2	ENSRNOT00000008730	ENSRNOG00000006467	Eif2b2	-78.3
NONRATT005770.2	ENSRNOT00000079826	ENSRNOG00000020374	Tmem8a	-80.8
NONRATT005770.2	ENSRNOT00000047380	ENSRNOG00000032561	Slc52a2	-78.8
NONRATT005770.2	ENSRNOT00000089841	ENSRNOG00000003745	Atf3	-74.1
NONRATT005770.2	ENSRNOT00000025385	ENSRNOG00000018781	Map1s	-81.5
NONRATT005770.2	ENSRNOT00000005129	ENSRNOG00000003865	Tmigd1	-75.1
NONRATT005770.2	ENSRNOT00000019117	ENSRNOG00000014231	Pnoc	-81.4
NONRATT005770.2	ENSRNOT00000022483	ENSRNOG00000016767	Ggps1	-81.5
NONRATT005770.2	ENSRNOT00000038953	ENSRNOG00000021365	Ybey	-81
NONRATT005770.2	ENSRNOT00000072099	ENSRNOG00000048712	Ccdc137	-74.2
NONRATT005770.2	ENSRNOT00000007544	ENSRNOG00000005618	Fmc1	-78.3
NONRATT005770.2	ENSRNOT00000052408	ENSRNOG00000049104	LOC100911256	-77.2
NONRATT005770.2	ENSRNOT00000091172	ENSRNOG00000059997	Brip1	-74.9
NONRATT005770.2	ENSRNOT00000014708	ENSRNOG00000012227	Stambp	-81.5
NONRATT005770.2	ENSRNOT00000058095	ENSRNOG00000038166	Ptgr2	-77.2
NONRATT005770.2	ENSRNOT00000087355	ENSRNOG00000011962	Gin1	-71.7
NONRATT005770.2	ENSRNOT00000067796	ENSRNOG00000030572	Smc5	-80.8
NONRATT005770.2	ENSRNOT00000002396	ENSRNOG00000001757	Tm4sf19	-72.6
NONRATT005770.2	ENSRNOT00000084766	ENSRNOG00000051548	Lmod1	-70.1
NONRATT005770.2	ENSRNOT00000014470	ENSRNOG00000010680	Med12l	-78.3
NONRATT005770.2	ENSRNOT00000082614	ENSRNOG00000059640	Ccl28	-71.9
NONRATT005770.2	ENSRNOT00000082893	ENSRNOG00000052275	H2afv	-81.5
NONRATT005770.2	ENSRNOT00000090387	ENSRNOG00000016767	Ggps1	-81.5
NONRATT005770.2	ENSRNOT00000090908	ENSRNOG00000022778	Pphln1	-78.8
NONRATT005770.2	ENSRNOT00000084486	ENSRNOG00000059640	Ccl28	-71.9
NONRATT005770.2	ENSRNOT00000007202	ENSRNOG00000005378	Gna15	-74.7
NONRATT005770.2	ENSRNOT00000073596	ENSRNOG00000050828	Vkorc1	-80.8
NONRATT005770.2	ENSRNOT00000028591	ENSRNOG00000021056	Kcnj14	-81.4
NONRATT005770.2	ENSRNOT00000020793	ENSRNOG00000015459	Heatr3	-81.5
NONRATT005770.2	ENSRNOT00000019247	ENSRNOG00000014214	Rpl27a	-74.2
NONRATT005770.2	ENSRNOT00000083490	ENSRNOG00000009719	C2cd2l	-72.2
NONRATT005770.2	ENSRNOT00000079643	ENSRNOG00000052273	3110040N11Rik	-81.5
NONRATT005770.2	ENSRNOT00000014414	ENSRNOG00000010839	Krt222	-81.5
NONRATT005770.2	ENSRNOT00000002427	ENSRNOG00000001781	Lmln	-75.1
NONRATT005770.2	ENSRNOT00000031614	ENSRNOG00000028176	Elmod2	-78.7
NONRATT005770.2	ENSRNOT00000068405	ENSRNOG00000013692	LOC499602	-66.5
NONRATT005770.2	ENSRNOT00000082023	ENSRNOG00000021702	Mcmdc2	-73.2
NONRATT005770.2	ENSRNOT00000079290	ENSRNOG00000020630	Il9r	-71.5
NONRATT005770.2	ENSRNOT00000076602	ENSRNOG00000024128	Aco2	-80.8
NONRATT005770.2	ENSRNOT00000080769	ENSRNOG00000005193	Pfas	-74.7
NONRATT005770.2	ENSRNOT00000083109	ENSRNOG00000000503	Ppard	-78.8
NONRATT005770.2	ENSRNOT00000017005	ENSRNOG00000011879	Nfat5	-78.5
NONRATT005770.2	ENSRNOT00000026156	ENSRNOG00000019208	P2rx5	-80.7
NONRATT005770.2	ENSRNOT00000028047	ENSRNOG00000020658	Aarsd1	-79.7
NONRATT005770.2	ENSRNOT00000068334	ENSRNOG00000012734	Dcun1d1	-81.5
NONRATT005770.2	ENSRNOT00000077646	ENSRNOG00000054751	Lmbrd2	-81.5
NONRATT005770.2	ENSRNOT00000080101	ENSRNOG00000016767	Ggps1	-81.5
NONRATT005770.2	ENSRNOT00000020174	ENSRNOG00000014801	Exog	-81.5
NONRATT005770.2	ENSRNOT00000077803	ENSRNOG00000001073	RGD1563482	-71.7
NONRATT005770.2	ENSRNOT00000004223	ENSRNOG00000003132	Mip	-81.5
NONRATT005770.2	ENSRNOT00000055735	ENSRNOG00000016214	Agl	-81.4
NONRATT005770.2	ENSRNOT00000078739	ENSRNOG00000051592	Sirt1	-81.5
NONRATT005770.2	ENSRNOT00000089625	ENSRNOG00000001527	Cd80	-79.8
NONRATT005770.2	ENSRNOT00000029572	ENSRNOG00000024960	Smco1	-78.9
NONRATT005770.2	ENSRNOT00000006521	ENSRNOG00000004711	Mta1	-69
NONRATT005770.2	ENSRNOT00000085203	ENSRNOG00000003634	Zfp354a	-73.8
NONRATT019663.2	ENSRNOT00000009090	ENSRNOG00000025736	Tcf23	-81.9
NONRATT019663.2	ENSRNOT00000079875	ENSRNOG00000052506	Ak3	-88.5
NONRATT019663.2	ENSRNOT00000015821	ENSRNOG00000011663	Rnf7	-90
NONRATT019663.2	ENSRNOT00000001498	ENSRNOG00000001134	Rfc5	-90
NONRATT019663.2	ENSRNOT00000001937	ENSRNOG00000001426	Prkrip1	-84.8
NONRATT019663.2	ENSRNOT00000029723	ENSRNOG00000042201	Efcab2	-90
NONRATT019663.2	ENSRNOT00000025733	ENSRNOG00000019044	Adam30	-90
NONRATT019663.2	ENSRNOT00000025649	ENSRNOG00000018901	Rab14	-84.4
NONRATT019663.2	ENSRNOT00000044085	ENSRNOG00000025222	Pcid2	-91.2
NONRATT019663.2	ENSRNOT00000071269	ENSRNOG00000048606	Vma21	-84.4
NONRATT019663.2	ENSRNOT00000004638	ENSRNOG00000003457	Ccdc64b	-84.4
NONRATT019663.2	ENSRNOT00000085986	ENSRNOG00000007629	Sf3a3	-84.7
NONRATT019663.2	ENSRNOT00000065462	ENSRNOG00000043204	Harbi1	-84.4
NONRATT019663.2	ENSRNOT00000001640	ENSRNOG00000001225	Fam207a	-77.7
NONRATT019663.2	ENSRNOT00000018936	ENSRNOG00000014049	Riok1	-86.5
NONRATT019663.2	ENSRNOT00000091485	ENSRNOG00000026762	RT1-DOa	-82.7
NONRATT019663.2	ENSRNOT00000021322	ENSRNOG00000015787	P3h4	-76.3
NONRATT019663.2	ENSRNOT00000015057	ENSRNOG00000011071	Nt5e	-90
NONRATT019663.2	ENSRNOT00000071453	ENSRNOG00000048861	LOC498122	-84.4
NONRATT019663.2	ENSRNOT00000078870	ENSRNOG00000029466	RGD1562608	-88.7
NONRATT019663.2	ENSRNOT00000024835	ENSRNOG00000018330	Fam83f	-81.3
NONRATT019663.2	ENSRNOT00000079678	ENSRNOG00000011573	Csad	-91.2
NONRATT019663.2	ENSRNOT00000002476	ENSRNOG00000001811	Fgfr1op2	-82.4
NONRATT019663.2	ENSRNOT00000026613	ENSRNOG00000019653	Csrnp2	-81.7
NONRATT019663.2	ENSRNOT00000076585	ENSRNOG00000015787	P3h4	-76.4
NONRATT019663.2	ENSRNOT00000029223	ENSRNOG00000005153	LOC690422	-79.6
NONRATT019663.2	ENSRNOT00000007598	ENSRNOG00000005749	Foxred2	-81
NONRATT019663.2	ENSRNOT00000076823	ENSRNOG00000024128	Aco2	-90
NONRATT019663.2	ENSRNOT00000068020	ENSRNOG00000008064	Naga	-91.2
NONRATT019663.2	ENSRNOT00000012942	ENSRNOG00000009620	Cybrd1	-81.4
NONRATT019663.2	ENSRNOT00000026817	ENSRNOG00000019817	Ddx28	-82.2
NONRATT019663.2	ENSRNOT00000089591	ENSRNOG00000011975	Crtc3	-84.4
NONRATT019663.2	ENSRNOT00000083643	ENSRNOG00000051408	Magt1	-91.2
NONRATT019663.2	ENSRNOT00000000443	ENSRNOG00000000394	Srgn	-90
NONRATT019663.2	ENSRNOT00000052224	ENSRNOG00000025408	Duxbl1	-74.7
NONRATT019663.2	ENSRNOT00000051239	ENSRNOG00000032703	Rasgrp3	-90
NONRATT019663.2	ENSRNOT00000017712	ENSRNOG00000013110	Nudt2	-84.4
NONRATT019663.2	ENSRNOT00000042777	ENSRNOG00000050586	Stfa2l3	-75.7
NONRATT019663.2	ENSRNOT00000001570	ENSRNOG00000001187	Oasl	-86.1
NONRATT019663.2	ENSRNOT00000074582	ENSRNOG00000048138	Zfp566	-89.1
NONRATT019663.2	ENSRNOT00000037444	ENSRNOG00000021555	Mis18a	-84.4
NONRATT019663.2	ENSRNOT00000082774	ENSRNOG00000049115	Ccr5	-84.4
NONRATT019663.2	ENSRNOT00000076178	ENSRNOG00000030118	Msn	-91.2
NONRATT019663.2	ENSRNOT00000031905	ENSRNOG00000024450	Poc1b	-77
NONRATT019663.2	ENSRNOT00000081893	ENSRNOG00000013166	Wnt4	-90
NONRATT019663.2	ENSRNOT00000084417	ENSRNOG00000014049	Riok1	-86.5
NONRATT019663.2	ENSRNOT00000012606	ENSRNOG00000009076	Ttpal	-77.6
NONRATT019663.2	ENSRNOT00000060149	ENSRNOG00000039278	Mcart1	-82.4
NONRATT019663.2	ENSRNOT00000017340	ENSRNOG00000012965	Themis2	-78.3
NONRATT019663.2	ENSRNOT00000019630	ENSRNOG00000014628	Pomk	-81.6
NONRATT019663.2	ENSRNOT00000029230	ENSRNOG00000026488	Gltpd2	-90
NONRATT019663.2	ENSRNOT00000026878	ENSRNOG00000019830	Hsd17b1	-95.1
NONRATT019663.2	ENSRNOT00000006307	ENSRNOG00000042427	Gskip	-86.6
NONRATT019663.2	ENSRNOT00000082233	ENSRNOG00000000841	Ddx39b	-86.3
NONRATT019663.2	ENSRNOT00000009440	ENSRNOG00000006965	Aff4	-84.8
NONRATT019663.2	ENSRNOT00000026588	ENSRNOG00000019630	Hacl1	-79.6
NONRATT019663.2	ENSRNOT00000043230	ENSRNOG00000002255	Fam162a	-90
NONRATT019663.2	ENSRNOT00000013058	ENSRNOG00000009348	Nos3	-91.2
NONRATT019663.2	ENSRNOT00000055822	ENSRNOG00000004320	Tgm4	-91.2
NONRATT019663.2	ENSRNOT00000057716	ENSRNOG00000001339	Psmd9	-84.4
NONRATT019663.2	ENSRNOT00000001579	ENSRNOG00000001189	Sik1	-86.4
NONRATT019663.2	ENSRNOT00000075870	ENSRNOG00000002314	LOC103689943	-85.3
NONRATT019663.2	ENSRNOT00000091063	ENSRNOG00000006523	Atl2	-90
NONRATT019663.2	ENSRNOT00000022452	ENSRNOG00000016683	Zfp668	-82.7
NONRATT019663.2	ENSRNOT00000014738	ENSRNOG00000010985	Zfp410	-84.3
NONRATT019663.2	ENSRNOT00000077427	ENSRNOG00000019318	Syt3	-91.2
NONRATT019663.2	ENSRNOT00000013356	ENSRNOG00000010071	RGD1560010	-82.2
NONRATT019663.2	ENSRNOT00000015767	ENSRNOG00000022268	Pnpla3	-91.2
NONRATT019663.2	ENSRNOT00000061735	ENSRNOG00000018574	Qsox2	-90
NONRATT019663.2	ENSRNOT00000036993	ENSRNOG00000012436	Adh6	-90
NONRATT019663.2	ENSRNOT00000067558	ENSRNOG00000014218	Tmem25	-82.4
NONRATT019663.2	ENSRNOT00000055249	ENSRNOG00000000417	Numa1	-86.8
NONRATT019663.2	ENSRNOT00000010300	ENSRNOG00000007504	Actr10	-79.7
NONRATT019663.2	ENSRNOT00000073596	ENSRNOG00000050828	Vkorc1	-86.1
NONRATT019663.2	ENSRNOT00000026280	ENSRNOG00000019212	Tpp1	-91.2
NONRATT019663.2	ENSRNOT00000045157	ENSRNOG00000031162	Ccl24	-82.2
NONRATT019663.2	ENSRNOT00000029879	ENSRNOG00000027091	Kctd18	-91.2
NONRATT019663.2	ENSRNOT00000083539	ENSRNOG00000025423	Map3k13	-91.2
NONRATT019663.2	ENSRNOT00000021271	ENSRNOG00000015746	Kcng4	-78.4
NONRATT019663.2	ENSRNOT00000020407	ENSRNOG00000014584	Odf2	-82.3
NONRATT019663.2	ENSRNOT00000041039	ENSRNOG00000039057	Klf8	-78.9
NONRATT019663.2	ENSRNOT00000003128	ENSRNOG00000002254	Tmem33	-84.7
NONRATT019663.2	ENSRNOT00000013533	ENSRNOG00000010169	Atpaf1	-91.2
NONRATT019663.2	ENSRNOT00000009404	ENSRNOG00000006462	Ero1l	-91.2
NONRATT019663.2	ENSRNOT00000061123	ENSRNOG00000039829	Rpp14	-91.2
NONRATT019663.2	ENSRNOT00000065533	ENSRNOG00000019031	Neu4	-90
NONRATT019663.2	ENSRNOT00000078128	ENSRNOG00000058940	Rab11fip1	-88.6
NONRATT019663.2	ENSRNOT00000044413	ENSRNOG00000034134	Cpm	-90
NONRATT019663.2	ENSRNOT00000006374	ENSRNOG00000038720	Cdkl1	-91.2
NONRATT019663.2	ENSRNOT00000080769	ENSRNOG00000005193	Pfas	-73.1
NONRATT019663.2	ENSRNOT00000012434	ENSRNOG00000009250	Pts	-87.3
NONRATT019663.2	ENSRNOT00000019204	ENSRNOG00000014331	Zfp717	-83.9
NONRATT019663.2	ENSRNOT00000027785	ENSRNOG00000020444	Hcn3	-82.2
NONRATT019663.2	ENSRNOT00000024256	ENSRNOG00000017975	Dnajb13	-83.9
NONRATT019663.2	ENSRNOT00000085295	ENSRNOG00000059322	N4bp2l1	-82.4
NONRATT019663.2	ENSRNOT00000091362	ENSRNOG00000000457	Tap1	-84.4
NONRATT019663.2	ENSRNOT00000001536	ENSRNOG00000001161	Gatc	-82.2
NONRATT019663.2	ENSRNOT00000078383	ENSRNOG00000055408	Gcat	-91.2
NONRATT019663.2	ENSRNOT00000068418	ENSRNOG00000017181	Malt1	-83.9
NONRATT019663.2	ENSRNOT00000056048	ENSRNOG00000007262	Ccdc134	-89.1
NONRATT019663.2	ENSRNOT00000090457	ENSRNOG00000058793	AABR07027511.1	-84.4
NONRATT019663.2	ENSRNOT00000076490	ENSRNOG00000037919	Chic1	-82.3
NONRATT019663.2	ENSRNOT00000087230	ENSRNOG00000026110	Scml4	-90
NONRATT019663.2	ENSRNOT00000048407	ENSRNOG00000012818	Ksr1	-86.6
NONRATT019663.2	ENSRNOT00000028174	ENSRNOG00000020751	Rdm1	-91.2
NONRATT019663.2	ENSRNOT00000014541	ENSRNOG00000010794	Dennd3	-78.5
NONRATT019663.2	ENSRNOT00000043448	ENSRNOG00000033101	Myo18a	-78.5
NONRATT019663.2	ENSRNOT00000022514	ENSRNOG00000042029	Efs	-82.8
NONRATT019663.2	ENSRNOT00000016205	ENSRNOG00000011573	Csad	-91.2
NONRATT019663.2	ENSRNOT00000026742	ENSRNOG00000019727	Dph3	-90
NONRATT019663.2	ENSRNOT00000038994	ENSRNOG00000003622	Cybb	-90
NONRATT019663.2	ENSRNOT00000010869	ENSRNOG00000008022	Apaf1	-91.2
NONRATT019663.2	ENSRNOT00000026156	ENSRNOG00000019208	P2rx5	-81.1
NONRATT019663.2	ENSRNOT00000088607	ENSRNOG00000011228	Layn	-82.8
NONRATT019663.2	ENSRNOT00000091816	ENSRNOG00000016632	Dsg3	-91.2
NONRATT019663.2	ENSRNOT00000011061	ENSRNOG00000008065	Wwc1	-85.1
NONRATT019663.2	ENSRNOT00000015210	ENSRNOG00000011321	Rftn1	-84.4
NONRATT019663.2	ENSRNOT00000007309	ENSRNOG00000005491	Best3	-90
NONRATT019663.2	ENSRNOT00000077636	ENSRNOG00000052061	Ppef2	-78.3
NONRATT019663.2	ENSRNOT00000086078	ENSRNOG00000022893	Rimbp2	-80.8
NONRATT019663.2	ENSRNOT00000076137	ENSRNOG00000049137	Zfp35	-78.5
NONRATT019663.2	ENSRNOT00000001392	ENSRNOG00000001050	Eif2ak1	-90
NONRATT019663.2	ENSRNOT00000015452	ENSRNOG00000011560	Mtmr9	-91.2
NONRATT019663.2	ENSRNOT00000064905	ENSRNOG00000026110	Scml4	-90
NONRATT019663.2	ENSRNOT00000081424	ENSRNOG00000027787	Cdc6	-90
NONRATT019663.2	ENSRNOT00000064635	ENSRNOG00000010855	Mrp63	-90
NONRATT019663.2	ENSRNOT00000011747	ENSRNOG00000008619	Agtrap	-85.6
NONRATT019663.2	ENSRNOT00000088191	ENSRNOG00000059765	Asic1	-86.8
NONRATT019663.2	ENSRNOT00000085585	ENSRNOG00000011820	Acpp	-78.3
NONRATT019663.2	ENSRNOT00000057175	ENSRNOG00000000308	Zbtb24	-90
NONRATT019663.2	ENSRNOT00000022726	ENSRNOG00000016448	Eef2k	-75.8
NONRATT019663.2	ENSRNOT00000003397	ENSRNOG00000002509	Gnl3l	-82.3
NONRATT019663.2	ENSRNOT00000091323	ENSRNOG00000057141	AABR07035641.1	-85.2
NONRATT019663.2	ENSRNOT00000091702	ENSRNOG00000059801	Lima1	-80.8
NONRATT019663.2	ENSRNOT00000083110	ENSRNOG00000056011	AC139950.1	-91.2
NONRATT019663.2	ENSRNOT00000014063	ENSRNOG00000010572	Pus7	-85.5
NONRATT019663.2	ENSRNOT00000076133	ENSRNOG00000021719	Slfn5	-81.5
NONRATT019663.2	ENSRNOT00000024465	ENSRNOG00000017938	Btaf1	-78.8
NONRATT019663.2	ENSRNOT00000086038	ENSRNOG00000004158	Hdac9	-75.3
NONRATT019663.2	ENSRNOT00000031904	ENSRNOG00000027434	Fitm2	-83.1
NONRATT019663.2	ENSRNOT00000005611	ENSRNOG00000004027	Aldh9a1	-70.4
NONRATT019663.2	ENSRNOT00000016669	ENSRNOG00000012358	Pcyt1b	-77.9
NONRATT019663.2	ENSRNOT00000077803	ENSRNOG00000001073	RGD1563482	-90
NONRATT019663.2	ENSRNOT00000080651	ENSRNOG00000003261	Usp9x	-91.2
NONRATT019663.2	ENSRNOT00000024827	ENSRNOG00000018326	Pgls	-85.8
NONRATT019663.2	ENSRNOT00000078341	ENSRNOG00000002265	Casr	-81.4
NONRATT019663.2	ENSRNOT00000025970	ENSRNOG00000019165	Mrpl51	-85.1
NONRATT019663.2	ENSRNOT00000089584	ENSRNOG00000020482	Nfatc4	-86
NONRATT019663.2	ENSRNOT00000028907	ENSRNOG00000025895	Sdpr	-82.1
NONRATT019663.2	ENSRNOT00000028781	ENSRNOG00000021200	Hfe2	-84.4
NONRATT019663.2	ENSRNOT00000007490	ENSRNOG00000005408	LOC100911674	-90
NONRATT019663.2	ENSRNOT00000077225	ENSRNOG00000014265	Tnfrsf19	-83.1
NONRATT019663.2	ENSRNOT00000009649	ENSRNOG00000007203	Psmc6	-91.2
NONRATT019663.2	ENSRNOT00000087383	ENSRNOG00000004555	Sec14l4	-81.4
NONRATT019663.2	ENSRNOT00000070958	ENSRNOG00000003298	Cd247	-85.2
NONRATT019663.2	ENSRNOT00000034266	ENSRNOG00000016825	Cd3eap	-84.4
NONRATT019663.2	ENSRNOT00000038228	ENSRNOG00000027787	Cdc6	-90
NONRATT019663.2	ENSRNOT00000074824	ENSRNOG00000049019	Tmem170a	-89.5
NONRATT019663.2	ENSRNOT00000077165	ENSRNOG00000060320	Lin28a	-83.6
NONRATT019663.2	ENSRNOT00000058574	ENSRNOG00000038445	Rnf225	-84.7
NONRATT019663.2	ENSRNOT00000004403	ENSRNOG00000003298	Cd247	-85.2
NONRATT019663.2	ENSRNOT00000001238	ENSRNOG00000000934	Piwil1	-84.9
NONRATT019663.2	ENSRNOT00000027345	ENSRNOG00000020167	Reep5	-89.5
NONRATT019663.2	ENSRNOT00000039827	ENSRNOG00000022971	LOC102555919	-84.4
NONRATT019663.2	ENSRNOT00000022749	ENSRNOG00000016953	Chst4	-76.3
NONRATT019663.2	ENSRNOT00000054742	ENSRNOG00000024016	Cyp2c6v1	-90
NONRATT019663.2	ENSRNOT00000026580	ENSRNOG00000019629	Lamp1	-91.2
NONRATT019663.2	ENSRNOT00000039000	ENSRNOG00000022939	Gpkow	-78.6
NONRATT019663.2	ENSRNOT00000002755	ENSRNOG00000002011	Gnrhr	-77.8
NONRATT019663.2	ENSRNOT00000017607	ENSRNOG00000013171	Grm2	-82.5
NONRATT019663.2	ENSRNOT00000054974	ENSRNOG00000036699	RGD1306926	-90
NONRATT019663.2	ENSRNOT00000033964	ENSRNOG00000023312	Lonrf2	-85.9
NONRATT019663.2	ENSRNOT00000022724	ENSRNOG00000016926	Plekhs1	-89.5
NONRATT019663.2	ENSRNOT00000083899	ENSRNOG00000031916	Timeless	-82.6
NONRATT019663.2	ENSRNOT00000006874	ENSRNOG00000005006	Ndufaf1	-84.7
NONRATT019663.2	ENSRNOT00000071779	ENSRNOG00000050089	RGD1563334	-75.6
NONRATT019663.2	ENSRNOT00000038207	ENSRNOG00000042289	Plcxd2	-80.9
NONRATT019663.2	ENSRNOT00000089386	ENSRNOG00000051408	Magt1	-91.2
NONRATT019663.2	ENSRNOT00000067694	ENSRNOG00000018144	Depdc5	-84.4
NONRATT019663.2	ENSRNOT00000084707	ENSRNOG00000012037	Galnt7	-82.2
NONRATT019663.2	ENSRNOT00000008726	ENSRNOG00000006658	RGD1563015	-84.4
NONRATT019663.2	ENSRNOT00000055103	ENSRNOG00000036760	Tmc5	-79.3
NONRATT019663.2	ENSRNOT00000077378	ENSRNOG00000031162	Ccl24	-82.2
NONRATT019663.2	ENSRNOT00000023829	ENSRNOG00000017625	Htr2b	-82.4
NONRATT019663.2	ENSRNOT00000024286	ENSRNOG00000018009	Rab8b	-84.4
NONRATT019663.2	ENSRNOT00000081542	ENSRNOG00000059312	AABR07046231.1	-79
NONRATT019663.2	ENSRNOT00000035017	ENSRNOG00000025406	Iqgap2	-76.1
NONRATT019663.2	ENSRNOT00000009221	ENSRNOG00000007023	Galm	-91.2
NONRATT019663.2	ENSRNOT00000027196	ENSRNOG00000020076	RGD1311783	-84.4
NONRATT019663.2	ENSRNOT00000089393	ENSRNOG00000052023	AABR07002885.1	-76.7
NONRATT019663.2	ENSRNOT00000089660	ENSRNOG00000026061	RGD1566226	-90
NONRATT019663.2	ENSRNOT00000031018	ENSRNOG00000014935	Peo1	-81.2
NONRATT019663.2	ENSRNOT00000000246	ENSRNOG00000000230	Lmf1	-85.2
NONRATT019663.2	ENSRNOT00000073221	ENSRNOG00000045524	Slc39a3	-93.9
NONRATT019663.2	ENSRNOT00000071381	ENSRNOG00000047867	Klhdc8b	-85.3
NONRATT019663.2	ENSRNOT00000013279	ENSRNOG00000009826	Bche	-71.4
NONRATT019663.2	ENSRNOT00000003836	ENSRNOG00000002866	Rassf6	-82.7
NONRATT019663.2	ENSRNOT00000018882	ENSRNOG00000037695	Sgpp2	-75
NONRATT019663.2	ENSRNOT00000042757	ENSRNOG00000029064	Zcchc4	-76.7
NONRATT019663.2	ENSRNOT00000019335	ENSRNOG00000014409	Myl7	-82.2
NONRATT019663.2	ENSRNOT00000047179	ENSRNOG00000018967	Wdr59	-75.4
NONRATT019663.2	ENSRNOT00000023411	ENSRNOG00000017253	Ccdc107	-78.2
NONRATT019663.2	ENSRNOT00000042270	ENSRNOG00000001811	Fgfr1op2	-82.4
NONRATT019663.2	ENSRNOT00000076318	ENSRNOG00000014083	Iqsec3	-90
NONRATT019663.2	ENSRNOT00000087328	ENSRNOG00000054724	Pycrl	-78.5
NONRATT019663.2	ENSRNOT00000091712	ENSRNOG00000015150	Spg7	-91.2
NONRATT019663.2	ENSRNOT00000004150	ENSRNOG00000003111	Ovca2	-80.5
NONRATT019663.2	ENSRNOT00000030016	ENSRNOG00000028662	Zfp69	-82.9
NONRATT019663.2	ENSRNOT00000038550	ENSRNOG00000006925	Zfp786	-79.2
NONRATT019663.2	ENSRNOT00000016389	ENSRNOG00000012264	Alkbh1	-91.2
NONRATT019663.2	ENSRNOT00000064932	ENSRNOG00000039859	Dnmt1	-82.7
NONRATT019663.2	ENSRNOT00000087449	ENSRNOG00000000956	Rasl11a	-88.3
NONRATT019663.2	ENSRNOT00000001600	ENSRNOG00000028814	Oasl2	-87
NONRATT019663.2	ENSRNOT00000019987	ENSRNOG00000036866	Acer3	-79.4
NONRATT019663.2	ENSRNOT00000007588	ENSRNOG00000026702	Amica1	-80.4
NONRATT019663.2	ENSRNOT00000083069	ENSRNOG00000047620	Golph3l	-76.2
NONRATT019663.2	ENSRNOT00000003441	ENSRNOG00000002549	Htr5b	-90.7
NONRATT019663.2	ENSRNOT00000086082	ENSRNOG00000058940	Rab11fip1	-88.6
NONRATT019663.2	ENSRNOT00000027612	ENSRNOG00000020377	Cideb	-81.7
NONRATT019663.2	ENSRNOT00000031044	ENSRNOG00000024266	Haus5	-81.1
NONRATT019663.2	ENSRNOT00000087197	ENSRNOG00000010169	Atpaf1	-91.2
NONRATT019663.2	ENSRNOT00000012864	ENSRNOG00000009599	Rwdd2a	-90
NONRATT019663.2	ENSRNOT00000065644	ENSRNOG00000009783	Camk2g	-81.4
NONRATT019663.2	ENSRNOT00000024347	ENSRNOG00000001285	Atp2a2	-84.4
NONRATT019663.2	ENSRNOT00000070807	ENSRNOG00000047080	Gng4	-91.2
NONRATT019663.2	ENSRNOT00000022097	ENSRNOG00000038365	Plekha2	-91.2
NONRATT019663.2	ENSRNOT00000006116	ENSRNOG00000004555	Sec14l4	-81.4
NONRATT019663.2	ENSRNOT00000008140	ENSRNOG00000006131	Mettl2b	-84.5
NONRATT019663.2	ENSRNOT00000076602	ENSRNOG00000024128	Aco2	-90
NONRATT019663.2	ENSRNOT00000038365	ENSRNOG00000025360	Exd1	-75.8
NONRATT019663.2	ENSRNOT00000065771	ENSRNOG00000013610	Chrna5	-90
NONRATT019663.2	ENSRNOT00000001938	ENSRNOG00000001427	Orai2	-84.4
NONRATT019663.2	ENSRNOT00000015021	ENSRNOG00000010798	Blk	-82.2
NONRATT019663.2	ENSRNOT00000016148	ENSRNOG00000011885	Rhpn2	-90
NONRATT019663.2	ENSRNOT00000032568	ENSRNOG00000027979	LOC500354	-82.3
NONRATT019663.2	ENSRNOT00000089523	ENSRNOG00000054385	Rhebl1	-80.5
NONRATT004367.2	ENSRNOT00000087102	ENSRNOG00000060550	Epn2	-95.7
NONRATT028353.2	ENSRNOT00000077646	ENSRNOG00000054751	Lmbrd2	-79.5
NONRATT028353.2	ENSRNOT00000072511	ENSRNOG00000049426	Mmab	-81.8
NONRATT028353.2	ENSRNOT00000002987	ENSRNOG00000002194	Coq2	-85
NONRATT028353.2	ENSRNOT00000073746	ENSRNOG00000046493	Pnpo	-86.3
NONRATT028353.2	ENSRNOT00000080191	ENSRNOG00000057245	Rbbp8nl	-89.7
NONRATT028353.2	ENSRNOT00000013463	ENSRNOG00000010034	Asah1	-81.5
NONRATT028353.2	ENSRNOT00000087355	ENSRNOG00000011962	Gin1	-74
NONRATT028353.2	ENSRNOT00000002028	ENSRNOG00000001480	Ncf1	-81.8
NONRATT028353.2	ENSRNOT00000031614	ENSRNOG00000028176	Elmod2	-77.5
NONRATT028353.2	ENSRNOT00000016993	ENSRNOG00000012564	RGD1564541	-86.8
NONRATT028353.2	ENSRNOT00000067150	ENSRNOG00000020216	Gmpr2	-89.7
NONRATT028353.2	ENSRNOT00000026414	ENSRNOG00000019414	Tmem79	-87.6
NONRATT028353.2	ENSRNOT00000020182	ENSRNOG00000014940	Sfrp5	-80.5
NONRATT028353.2	ENSRNOT00000019127	ENSRNOG00000026295	Rbpjl	-79.6
NONRATT028353.2	ENSRNOT00000016040	ENSRNOG00000011964	Abcd4	-87.1
NONRATT028353.2	ENSRNOT00000077313	ENSRNOG00000052687	Megf8	-89.5
NONRATT028353.2	ENSRNOT00000024896	ENSRNOG00000018464	Lipt1	-76.6
NONRATT028353.2	ENSRNOT00000081539	ENSRNOG00000054581	Tmem101	-89.7
NONRATT028353.2	ENSRNOT00000075570	ENSRNOG00000046036	Rn60_1_2787.1	-89.7
NONRATT028353.2	ENSRNOT00000042539	ENSRNOG00000000503	Ppard	-90.6
NONRATT028353.2	ENSRNOT00000058095	ENSRNOG00000038166	Ptgr2	-78.8
NONRATT028353.2	ENSRNOT00000020793	ENSRNOG00000015459	Heatr3	-76.7
NONRATT028353.2	ENSRNOT00000000125	ENSRNOG00000000113	Elac1	-84.3
NONRATT028353.2	ENSRNOT00000010238	ENSRNOG00000007508	Lrtm2	-85.2
NONRATT028353.2	ENSRNOT00000002779	ENSRNOG00000002032	Ifngr2	-85.4
NONRATT028353.2	ENSRNOT00000014708	ENSRNOG00000012227	Stambp	-76.6
NONRATT028353.2	ENSRNOT00000079643	ENSRNOG00000052273	3110040N11Rik	-81.5
NONRATT028353.2	ENSRNOT00000068360	ENSRNOG00000025269	Slc25a44	-89.7
NONRATT028353.2	ENSRNOT00000028047	ENSRNOG00000020658	Aarsd1	-76.4
NONRATT028353.2	ENSRNOT00000025385	ENSRNOG00000018781	Map1s	-74.6
NONRATT028353.2	ENSRNOT00000079826	ENSRNOG00000020374	Tmem8a	-76.1
NONRATT028353.2	ENSRNOT00000025933	ENSRNOG00000019080	Hsd3b7	-85
NONRATT028353.2	ENSRNOT00000037039	ENSRNOG00000028493	Ppp1r15b	-83.2
NONRATT028353.2	ENSRNOT00000013515	ENSRNOG00000010134	Acot2	-85
NONRATT028353.2	ENSRNOT00000038953	ENSRNOG00000021365	Ybey	-83.4
NONRATT028353.2	ENSRNOT00000087612	ENSRNOG00000058003	Spon1	-89.7
NONRATT028353.2	ENSRNOT00000026540	ENSRNOG00000060429		-80.9
NONRATT028353.2	ENSRNOT00000014470	ENSRNOG00000010680	Med12l	-80.3
NONRATT028353.2	ENSRNOT00000083287	ENSRNOG00000014903	Zfyve27	-89.7
NONRATT028353.2	ENSRNOT00000030559	ENSRNOG00000028185	Tstd3	-75.3
NONRATT028353.2	ENSRNOT00000030462	ENSRNOG00000010345	Ssmem1	-87.9
NONRATT028353.2	ENSRNOT00000009122	ENSRNOG00000006399	Synj2bp	-89.6
NONRATT028353.2	ENSRNOT00000085591	ENSRNOG00000037509	Chek2	-81.5
NONRATT028353.2	ENSRNOT00000023709	ENSRNOG00000017575	Gins2	-80.4
NONRATT028353.2	ENSRNOT00000075344	ENSRNOG00000046002	LOC301124	-83.4
NONRATT028353.2	ENSRNOT00000029572	ENSRNOG00000024960	Smco1	-76.7
NONRATT028353.2	ENSRNOT00000015016	ENSRNOG00000011304	LOC100360397	-76.6
NONRATT028353.2	ENSRNOT00000002397	ENSRNOG00000001758	Tctex1d2	-75.3
NONRATT028353.2	ENSRNOT00000020174	ENSRNOG00000014801	Exog	-79.2
NONRATT028353.2	ENSRNOT00000076173	ENSRNOG00000026716	Rpl9	-89.7
NONRATT028353.2	ENSRNOT00000015890	ENSRNOG00000011598	Slc15a1	-84.5
NONRATT028353.2	ENSRNOT00000001923	ENSRNOG00000001419	Cldn15	-85.3
NONRATT028353.2	ENSRNOT00000005426	ENSRNOG00000004091	Cwc25	-89.7
NONRATT028353.2	ENSRNOT00000083144	ENSRNOG00000060052	AABR07063516.1	-85
NONRATT028353.2	ENSRNOT00000084642	ENSRNOG00000052142	Ahsa2	-80.5
NONRATT028353.2	ENSRNOT00000006521	ENSRNOG00000004711	Mta1	-69.5
NONRATT028353.2	ENSRNOT00000068334	ENSRNOG00000012734	Dcun1d1	-76.7
NONRATT028353.2	ENSRNOT00000080099	ENSRNOG00000056621	AC099384.2	-79.6
NONRATT028353.2	ENSRNOT00000034683	ENSRNOG00000025184	Prss35	-88.9
NONRATT028353.2	ENSRNOT00000021064	ENSRNOG00000015538	Abcd2	-85.4
NONRATT028353.2	ENSRNOT00000090908	ENSRNOG00000022778	Pphln1	-77.9
NONRATT028353.2	ENSRNOT00000068666	ENSRNOG00000019196	Xpnpep3	-87.8
NONRATT028353.2	ENSRNOT00000090987	ENSRNOG00000059474	Mob1a	-78.8
NONRATT028353.2	ENSRNOT00000022713	ENSRNOG00000022054	Paqr7	-80
NONRATT028353.2	ENSRNOT00000009709	ENSRNOG00000007333	Wdr20	-80.5
NONRATT028353.2	ENSRNOT00000019991	ENSRNOG00000014712	Zfp39	-82.6
NONRATT028353.2	ENSRNOT00000019703	ENSRNOG00000014493	Golga1	-89.7
NONRATT028353.2	ENSRNOT00000090536	ENSRNOG00000015616	Rgs14	-80.2
NONRATT028353.2	ENSRNOT00000065593	ENSRNOG00000031993	Prim1	-77.6
NONRATT028353.2	ENSRNOT00000030485	ENSRNOG00000027088	Ube2k	-94.3
NONRATT028353.2	ENSRNOT00000026168	ENSRNOG00000019352	Emc6	-80.5
NONRATT028353.2	ENSRNOT00000035245	ENSRNOG00000021560	Cass4	-89.7
NONRATT028353.2	ENSRNOT00000026588	ENSRNOG00000019630	Hacl1	-80.5
NONRATT028353.2	ENSRNOT00000031026	ENSRNOG00000024410	Blvrb	-89.5
NONRATT028353.2	ENSRNOT00000081140	ENSRNOG00000052415	Gstt2	-89.7
NONRATT028353.2	ENSRNOT00000024976	ENSRNOG00000018476	Fuom	-89.7
NONRATT028353.2	ENSRNOT00000016679	ENSRNOG00000012475	Prr5	-84
NONRATT028353.2	ENSRNOT00000006195	ENSRNOG00000004660	Fzd6	-89.5
NONRATT028353.2	ENSRNOT00000037739	ENSRNOG00000027332	Gemin6	-82.6
NONRATT028353.2	ENSRNOT00000035047	ENSRNOG00000024543	RGD1561777	-85
NONRATT028353.2	ENSRNOT00000014414	ENSRNOG00000010839	Krt222	-80.3
NONRATT028353.2	ENSRNOT00000025241	ENSRNOG00000018590	Drg1	-87.2
NONRATT028353.2	ENSRNOT00000021764	ENSRNOG00000015895	B4galt6	-76.3
NONRATT028353.2	ENSRNOT00000004244	ENSRNOG00000003176	Mixl1	-94.3
NONRATT028353.2	ENSRNOT00000010056	ENSRNOG00000007637	Acer2	-89.7
NONRATT028353.2	ENSRNOT00000004350	ENSRNOG00000003247	Sde2	-86.6
NONRATT028353.2	ENSRNOT00000002465	ENSRNOG00000001807	Sspn	-88.3
NONRATT028353.2	ENSRNOT00000007544	ENSRNOG00000005618	Fmc1	-80.3
NONRATT028353.2	ENSRNOT00000031549	ENSRNOG00000025808	Aars2	-81.6
NONRATT028353.2	ENSRNOT00000061249	ENSRNOG00000019232	RGD1311345	-89.7
NONRATT028353.2	ENSRNOT00000073220	ENSRNOG00000045795	Pddc1	-79.6
NONRATT028353.2	ENSRNOT00000076439	ENSRNOG00000014909	Sh2d5	-75.3
NONRATT028353.2	ENSRNOT00000085812	ENSRNOG00000009172	Cpvl	-89.7
NONRATT028353.2	ENSRNOT00000054685	ENSRNOG00000014705	Rbm20	-89.5
NONRATT028353.2	ENSRNOT00000080555	ENSRNOG00000020777	Zfp382	-89.7
NONRATT028353.2	ENSRNOT00000021917	ENSRNOG00000016279	Zfp865	-78.7
NONRATT028353.2	ENSRNOT00000004223	ENSRNOG00000003132	Mip	-80.9
NONRATT028353.2	ENSRNOT00000002520	ENSRNOG00000001842	Mrps35	-89.1
NONRATT028353.2	ENSRNOT00000077803	ENSRNOG00000001073	RGD1563482	-84.3
NONRATT028353.2	ENSRNOT00000080574	ENSRNOG00000060325	Lefty2	-85
NONRATT028353.2	ENSRNOT00000091172	ENSRNOG00000059997	Brip1	-83
NONRATT028353.2	ENSRNOT00000017202	ENSRNOG00000012763	Cwf19l1	-89.5
NONRATT028353.2	ENSRNOT00000026165	ENSRNOG00000019317	Cplx3	-89.7
NONRATT028353.2	ENSRNOT00000022483	ENSRNOG00000016767	Ggps1	-79.7
NONRATT028353.2	ENSRNOT00000003823	ENSRNOG00000002843	Cxcl6	-89.5
NONRATT028353.2	ENSRNOT00000044541	ENSRNOG00000030363	Psma8	-84.3
NONRATT028353.2	ENSRNOT00000049759	ENSRNOG00000015582	Me2	-84.3
NONRATT028353.2	ENSRNOT00000065677	ENSRNOG00000042944	Cenpw	-82.6
NONRATT028353.2	ENSRNOT00000034998	ENSRNOG00000024743	L3mbtl2	-82.8
NONRATT028353.2	ENSRNOT00000065791	ENSRNOG00000020420	Pklr	-83.1
NONRATT028353.2	ENSRNOT00000080101	ENSRNOG00000016767	Ggps1	-79.7
NONRATT028353.2	ENSRNOT00000013514	ENSRNOG00000030538	Slco1b2	-77.4
NONRATT028353.2	ENSRNOT00000014478	ENSRNOG00000009549	Fbxo3	-80
NONRATT028353.2	ENSRNOT00000086888	ENSRNOG00000003629	Nvl	-88.9
NONRATT028353.2	ENSRNOT00000043737	ENSRNOG00000030688	Lrrc2	-89.6
NONRATT028353.2	ENSRNOT00000024465	ENSRNOG00000017938	Btaf1	-82.3
NONRATT028353.2	ENSRNOT00000002032	ENSRNOG00000001483	Wbscr16	-75.3
NONRATT028353.2	ENSRNOT00000021833	ENSRNOG00000016010	Mul1	-79.6
NONRATT028353.2	ENSRNOT00000017005	ENSRNOG00000011879	Nfat5	-75.2
NONRATT028353.2	ENSRNOT00000060937	ENSRNOG00000008368	Nanog	-83.8
NONRATT028353.2	ENSRNOT00000089138	ENSRNOG00000019232	RGD1311345	-89.7
NONRATT028353.2	ENSRNOT00000072653	ENSRNOG00000050059	AABR07035776.1	-88.9
NONRATT028353.2	ENSRNOT00000002410	ENSRNOG00000001770	Ehhadh	-89.7
NONRATT028353.2	ENSRNOT00000036999	ENSRNOG00000022283	Lhfpl5	-89.7
NONRATT028353.2	ENSRNOT00000026204	ENSRNOG00000019376	Zfp329	-83.9
NONRATT028353.2	ENSRNOT00000020499	ENSRNOG00000015249	RGD1562299	-94.3
NONRATT028353.2	ENSRNOT00000028187	ENSRNOG00000020777	Zfp382	-85
NONRATT028353.2	ENSRNOT00000060193	ENSRNOG00000039297	Mrpl52	-82.6
NONRATT028353.2	ENSRNOT00000085203	ENSRNOG00000003634	Zfp354a	-76.6
NONRATT028353.2	ENSRNOT00000086042	ENSRNOG00000047905	Dus1l	-85
NONRATT028353.2	ENSRNOT00000075201	ENSRNOG00000047295	Prr22	-89.5
NONRATT028353.2	ENSRNOT00000009904	ENSRNOG00000007310	Klrb1b	-89.7
NONRATT028353.2	ENSRNOT00000025342	ENSRNOG00000018752	Clcf1	-87.8
NONRATT028353.2	ENSRNOT00000009202	ENSRNOG00000006893	Ppm1k	-85
NONRATT028353.2	ENSRNOT00000005715	ENSRNOG00000004263	Ints7	-86.5
NONRATT028353.2	ENSRNOT00000024054	ENSRNOG00000017693	Slc2a5	-87.3
NONRATT028353.2	ENSRNOT00000001139	ENSRNOG00000000854	Ncr3	-85
NONRATT028353.2	ENSRNOT00000029184	ENSRNOG00000028548	Ccl9	-87.8
NONRATT028353.2	ENSRNOT00000078439	ENSRNOG00000030688	Lrrc2	-89.6
NONRATT028353.2	ENSRNOT00000013001	ENSRNOG00000009815	Pnma2	-89.7
NONRATT028353.2	ENSRNOT00000031904	ENSRNOG00000027434	Fitm2	-87.8
NONRATT028353.2	ENSRNOT00000043518	ENSRNOG00000031896	Stt3a	-89.7
NONRATT028353.2	ENSRNOT00000087327	ENSRNOG00000053675	Dhh	-89
NONRATT028353.2	ENSRNOT00000007598	ENSRNOG00000005749	Foxred2	-81.5
NONRATT028353.2	ENSRNOT00000030749	ENSRNOG00000022502	Nsrp1	-76.7
NONRATT028353.2	ENSRNOT00000008730	ENSRNOG00000006467	Eif2b2	-80.5
NONRATT028353.2	ENSRNOT00000073596	ENSRNOG00000050828	Vkorc1	-76.1
NONRATT028353.2	ENSRNOT00000023706	ENSRNOG00000017349	Tbc1d10b	-89.7
NONRATT028353.2	ENSRNOT00000089625	ENSRNOG00000001527	Cd80	-80.1
NONRATT028353.2	ENSRNOT00000015568	ENSRNOG00000011652	Sppl2a	-84.3
NONRATT028353.2	ENSRNOT00000074632	ENSRNOG00000048258	Cisd2	-87.1
NONRATT028353.2	ENSRNOT00000031044	ENSRNOG00000024266	Haus5	-89.7
[truncated: 142,266 more rows]
